# Supplementary material for: Aqueous hydroboration of alkynes via nonclassical generation of N-heterocyclic carbenes
Source: Royal Society of Chemistry journal article supplement (doi:10.1039/d3gc01232h), 2023-01-01
Supplement: d3gc01232h1.pdf [file d3gc01232h1.pdf]

## *Supporting Information*

### **Aqueous Hydroboration of Alkynes via Nonclassical Generation of N-Heterocyclic Carbenes**

Sheng Tao,<sup>a</sup> Yang Wang,<sup>b</sup> Qianxiu Pan,<sup>a</sup> Jixing Zhao,<sup>a</sup> Qingqing Bu,<sup>a</sup> Fei Chen,<sup>a</sup> Jichang Liu,<sup>a,c</sup> Bin Dai,<sup>a,\*</sup> Donghui Wei,<sup>d,\*</sup> Ning Liu<sup>a,\*</sup>

<sup>a</sup>School of Chemistry and Chemical Engineering/State Key Laboratory Incubation Base for Green Processing of Chemical Engineering, Shihezi University, Shihezi, Xinjiang 832003, China

<sup>b</sup>Department of Material and Chemical Engineering, Zhengzhou University of Light Industry, Zhengzhou, 450002, China

<sup>c</sup>School of Chemical Engineering, East China University of Science and Technology, Shanghai 200237, China

<sup>d</sup>College of Chemistry, Zhengzhou University, Zhengzhou, 450001, China

\*E-mail for Bin Dai: db\_tea@shzu.edu.cn

\*E-mail for Donghui Wei: donghuiwei@zzu.edu.cn

\*E-mail for Ning Liu: ningliu@shzu.edu.cn

Number of Pages: 119

Number of Figures: 92

Number of Tables: 3

## List of Contents

|                                                            |          |
|------------------------------------------------------------|----------|
| 1. General Information.....                                | S3       |
| 2. General Procedure for the Hydroboration of Alkynes..... | S4       |
| 3. Optimization of reaction conditions.....                | S5-S6    |
| 4. Characterization Data for Catalysts.....                | S7-S9    |
| 5. Characterization Data for M.....                        | S10      |
| 6. Characterization Data for Hydroborated Products.....    | S11-S19  |
| 7. Characterization Data for Functionalized Products.....  | S20-S21  |
| 8. References.....                                         | S22-S23  |
| 9. NMR Spectra for Catalysts.....                          | S24-S29  |
| 10. NMR Spectra for M.....                                 | S30-S31  |
| 11. NMR Spectra for Hydroborated Products.....             | S32-S65  |
| 12. NMR Spectra for Functionalized Products.....           | S66-S68  |
| 13. Control Experiment.....                                | S69      |
| 14. Details on the IR Investigations.....                  | S70      |
| 15. X-Ray Data for M.....                                  | S71-S72  |
| 16. HRMS Spectra for diboration product.....               | S73      |
| 17. DFT Computational Results.....                         | S74-S119 |

## 1. General Information

All organic solvents, bases, reagents, and metal salt were purchased from commercial suppliers and were used without further purification, unless otherwise noted. All reactions were performed under air atmosphere, unless otherwise noted. All reaction tubes in experiments used the Schlenk tubes. The NMR spectra were recorded on a Bruker Avance III HD 400 spectrometer using TMS as internal standard (400 MHz for  $^1\text{H}$  NMR, 100 MHz for  $^{13}\text{C}$  NMR, MHz for  $^{19}\text{F}$  NMR and 128  $^{11}\text{B}$  NMR). Mass spectroscopy data were collected on a Bruker solanX 70 FT-MS and a Waters UPLC G2-XS Qtof. Single crystal structure determination was conducted on a Bruker D8 Venture X ray diffractometer equipped with a PHOTON II CPAD detector. FT-IR spectra were recorded on a Tianjin Gangdong FTIR-650 spectrometer. The catalysts **C1**, **C2**, **C3**, and **C4** were purchased from commercial suppliers.

## 2. General Procedure for the Hydroboration of Alkynes

**Method A:** A mixture of alkyne (1.0 mmol), diboron reagent (1.2 mmol) and **C6** (0.01 mmol) in THF (1 ml) and MeOH (1 ml) in a 50 ml reaction tube was stirred for 12 h at 60 °C. The reaction mixture was added to brine (100 ml) and extracted three times with dichloromethane ( $3 \times 15$  ml). The desired hydroboration of alkynes were isolated by short chromatography.

**Method B:** A mixture of alkyne (1.0 mmol), diboron reagent (1.2 mmol) and **C6** (0.05 mmol) in water (2 ml) in a 50 ml reaction tube was stirred for 12 h at 50 °C. The reaction mixture was added to brine (100 ml) and extracted three times with dichloromethane ( $3 \times 15$  ml). The desired hydroboration of alkynes were isolated by short chromatography.

**Method C:** A mixture of alkyne (1.0 mmol), diboron reagent (1.2 mmol) and **C6** (0.05 mmol) in water (2 ml) and THF (100  $\mu$ l) in a 50 ml reaction tube was stirred for 12 h at 50 °C. The reaction mixture was added to brine (100 ml) and extracted three times with dichloromethane ( $3 \times 15$  ml). The desired hydroboration of alkynes were isolated by short chromatography.

### 3. Optimization of reaction conditions

**Table S1.** Optimization of hydroboration of terminal alkynes in water

$\text{1a} + \text{1a'} \xrightarrow{\text{H}_2\text{O}} \text{2a}$

| Entry | Cat.                | Temperature/°C | Time/h | Yield/% | <i>E:Z</i> ratio |
|-------|---------------------|----------------|--------|---------|------------------|
| 1     | <b>C6</b> (1 mol%)  | 80             | 12     | 84      | > 99:1           |
| 2     | <b>C6</b> (2 mol%)  | 80             | 12     | 86      | > 99:1           |
| 3     | <b>C6</b> (4 mol%)  | 80             | 12     | 88      | > 99:1           |
| 4     | <b>C6</b> (5 mol%)  | 80             | 12     | 94      | > 99:1           |
| 5     | <b>C6</b> (10 mol%) | 80             | 12     | 95      | > 99:1           |
| 6     | <b>C6</b> (5 mol%)  | 70             | 12     | 93      | > 99:1           |
| 7     | <b>C6</b> (5 mol%)  | 60             | 12     | 91      | > 99:1           |
| 8     | <b>C6</b> (5 mol%)  | 50             | 12     | 90      | > 99:1           |
| 9     | <b>C6</b> (5 mol%)  | 40             | 12     | 61      | > 99:1           |
| 10    | <b>C6</b> (5 mol%)  | rt             | 12     | trace   |                  |
| 11    | <b>C7</b> (5 mol%)  | 50             | 12     | 89      | > 99:1           |
| 12    | <b>C8</b> (5 mol%)  | 50             | 12     | 79      | > 99:1           |
| 13    | <b>C9</b> (5 mol%)  | 50             | 12     | 86      | > 99:1           |
| 14    | <b>C10</b> (5 mol%) | 50             | 12     | 32      | > 99:1           |
| 15    | <b>C5</b> (5 mol%)  | 50             | 12     | 0       |                  |
| 16    | <b>C6</b> (5 mol%)  | 50             | 10     | 84      | > 99:1           |
| 17    | <b>C6</b> (5 mol%)  | 50             | 8      | 79      | > 99:1           |
| 18    | <b>C6</b> (5 mol%)  | 50             | 5      | 66      | > 99:1           |

<sup>a</sup>Conditions: **1a** (1.0 mmol), **1a'** (1.2 mmol, 1.2 equiv), cat. (as shown in Table), H<sub>2</sub>O (2 mL), temperature and time as shown in Table, isolated yield determined by column chromatography. *E:Z* ratio determined by <sup>1</sup>H NMR.

**Table S2.** Effect of THF/MeOH volume ratio on boration of alkyne

| Entry | THF/mL | MeOH/mL | THF: MeOH (v:v) | Yield/% |
|-------|--------|---------|-----------------|---------|
| 1     | 0      | 2       | 0: 2            | 86.3    |
| 2     | 0.2    | 1.8     | 1: 9            | 88.7    |
| 3     | 0.5    | 1.5     | 1: 3            | 87.6    |
| 4     | 0.8    | 1.2     | 2: 3            | 90.3    |
| 5     | 1      | 1       | 1: 1            | 93.1    |
| 6     | 1.2    | 0.8     | 3: 2            | 87.9    |
| 7     | 1.5    | 0.5     | 3: 1            | 80.1    |
| 8     | 1.8    | 0.2     | 9: 1            | trace   |
| 9     | 2      | 0       | 2: 0            | 0       |

Conditions: **1a** (1.0 mmol), **1a'** (1.2 mmol), catalysts (0.01 mmol, 1 mol%), THF (as shown in Table) and MeOH (as shown in Table), 60 °C, 12 h, isolated yield determined by column chromatography.

## 4. Characterization Data for Catalysts

### 3-propyl-1-(pyridin-2-yl)-1*H*-benzo[*d*]imidazol-3-ium (C5)

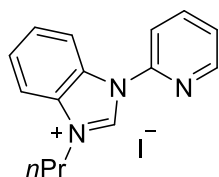

**C5** was synthesized by previously reported methods.<sup>1</sup> A mixture of 2-bromopyridine (0.5 mmol), benzimidazole (1.0 mmol), the CuI (0.1 mmol), *N,N,N',N'*-tetramethylethane-1,2-diamine (0.2 mmol), and K<sub>2</sub>CO<sub>3</sub> (1.5 mmol) in DMSO (2 mL) was combined under nitrogen. The reaction mixture was stirred at room temperature for 30 min and then heated to 110 °C for 48 h. The resultant 2-substituent-pyridine (0.5 mmol), and 1-iodopropane (1 mL) was heated to 110 °C for 8 h under air. Purification by flash chromatography (DCM:MeOH = 30:1): a yellowish solid (144 mg, 79%), mp = 157-158 °C; <sup>1</sup>H NMR (400 MHz, DMSO-*d*<sub>6</sub>): δ 10.61 (s, 1H), 8.76 (d, *J* = 4.8 Hz, 1H), 8.47-8.44 (m, 1H), 8.30-8.25 (m, 2H), 8.14 (d, *J* = 8.4 Hz, 1H), 7.76-7.69 (m, 3H), 4.61 (t, *J* = 7.6 Hz, 2H), 2.05 (sext, *J* = 7.6 Hz, 2H), 1.00 (t, *J* = 7.6 Hz, 3H), ppm; <sup>13</sup>C NMR (100 MHz, DMSO-*d*<sub>6</sub>): δ 149.80, 147.87, 142.56, 140.98, 132.10, 129.90, 128.16, 127.58, 125.49, 117.56, 116.48, 114.63, 49.29, 22.51, 11.32, ppm.

### *N*-propyl-*N*-(2-(pyridin-2-ylamino)phenyl)formamide (C6)

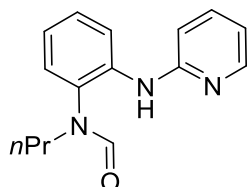

**C6** was synthesized by previously reported methods.<sup>2</sup> 3-propyl-1-(pyridin-2-yl)-1*H*-benzo[*d*]imidazol-3-ium iodide (1.0 mmol), KO<sup>*t*</sup>Bu (1.2 equiv.) and THF (9 ml) and water (1 ml) in a 50 ml reaction tube was stirred for 2 h at room temperature. The reaction mixture was added to brine (100 ml) and extracted three times with dichloromethane (3×15 ml). Purification by flash chromatography (petroleum ether:EtOAc = 2:1): a white solid (118 mg, 92%), mp = 117-118 °C; mixture of two rotamers (**a/b** = 7/3); <sup>1</sup>H NMR (400 MHz, CDCl<sub>3</sub>): δ 8.33-8.16 (m, **a**-2H and **b**-2H), 8.08 (d, *J* = 8.4 Hz, **a**-1H), 7.76 (d, *J* = 8.0 Hz, **b**-1H), 7.52 (t, *J* = 5.6 Hz, **a**-1H), 7.45 (t, *J* = 5.6 Hz, **b**-1H), 7.37-7.28 (m, **a**-1H and **b**-1H), 7.22-6.90 (m, **a**-5H and **b**-5H), 3.63-3.57 (m, **a**-2H and **b**-2H), 1.58-1.49 (m, **a**-2H), 1.49-1.41 (m, **b**-2H), 0.85 (t, *J* = 7.2 Hz, **a**-3H), 0.80 (t, *J* = 7.2 Hz, **b**-3H), ppm; <sup>13</sup>C NMR (100 MHz, CDCl<sub>3</sub>): δ 163.63-**a**, 162.73-**b**, 156.02-**b**, 155.23-**a**, 148.27-**b**, 148.07-**a**, 138.13-**b**, 137.75-**a**, 137.63-**a**, 137.46-**b**, 130.73-**b**, 130.06-**b**, 129.72-**a**, 129.24-**a**, 128.55-**a**, 127.69-**b**, 124.05-**b**, 123.61-**a**, 122.34-**a**, 120.87-**b**, 115.85-**a**, 115.06-**b**, 110.36-**a**, 109.06-**b**, 52.30-**b**, 46.55-**a**, 21.92-**b**, 20.87-**a**, 11.32-**a**, 10.80-**b**, ppm.

***N*-(2-(phenylamino)phenyl)-*N*-propylformamide (C7)**

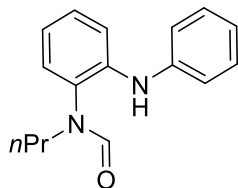

**C7** was synthesized by previously reported methods.<sup>2</sup> 1-phenyl-3-propyl-1*H*-benzo[*d*]imidazol-3-ium iodide (1.0 mmol), KO<sup>t</sup>Bu (1.2 equiv.) and THF (9 ml) and water (1 ml) in a 50 ml reaction tube was stirred for 2 h at room temperature. The reaction mixture was added to brine (100 ml) and extracted three times with dichloromethane (3×15 ml). Purification by flash chromatography (petroleum ether:EtOAc = 2:1): a white solid (241 mg, 95%), mp = 104-106 °C; mixture of two rotamers (**a/b** = 7/3); <sup>1</sup>H NMR (400 MHz, CDCl<sub>3</sub>): δ 8.34 (s, **b**-1H), 8.20 (s, **a**-1H), 7.35-6.89 (m, **a**-9H and **b**-9H), 5.88 (s, **b**-1H), 5.76 (s, **a**-1H), 3.65-3.61 (m, **a**-2H and **b**-2H), 1.65-1.43 (m, **a**-2H and **b**-2H), 0.90 (t, *J* = 7.2 Hz, **a**-3H), 0.85 (t, *J* = 7.2 Hz, **b**-3H), ppm; <sup>13</sup>C NMR (100 MHz, CDCl<sub>3</sub>): δ 163.71-**a**, 162.44-**b**, 143.43-**b**, 141.62-**a**, 140.94-**a**, 140.33-**b**, 130.04-**b**, 129.52-**a**, 129.34-**b**, 129.30-**a**, 128.52-**a**, 127.41-**b**, 122.47-**a**, 122.29-**b**, 120.70-**b**, 120.50-**b**, 120.44-**b**, 119.63-**a**, 117.84-**a**, 116.65-**a**, 52.59-**b**, 46.40-**a**, 21.96-**b**, 21.00-**a**, 11.38-**a**, 10.89-**b**, ppm; HRMS (ESI) calcd for C<sub>16</sub>H<sub>18</sub>N<sub>2</sub>O [M + Na]<sup>+</sup> 277.1317, found 277.1311.

***N*-isopropyl-*N*-(2-(pyridin-2-ylamino)phenyl)formamide (C8)**

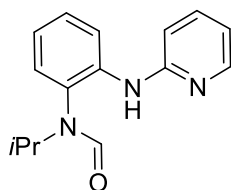

**C8** was synthesized by previously reported methods.<sup>2</sup> 3-isopropyl-1-(pyridin-2-yl)-1*H*-benzo[*d*]imidazol-3-ium iodide (1.0 mmol), KO<sup>t</sup>Bu (1.2 equiv.) and THF (9 ml) and water (1 ml) in a 50 ml reaction tube was stirred for 2 h at room temperature. The reaction mixture was added to brine (100 ml) and extracted three times with dichloromethane (3×15 ml). Purification by flash chromatography (petroleum ether:EtOAc = 5:1): a white solid (235 mg, 92%); mp = 100-101 °C; mixture of two rotamers (**a/b** = 7/3); <sup>1</sup>H NMR (400 MHz, CDCl<sub>3</sub>): δ 8.47 (s, **b**-1H), 8.23 (d, *J* = 4.0 Hz, **a**-1H), 8.18 (s, **a**-1H), 8.16 (s, **b**-1H), 8.10 (s, **a**-1H), 7.79 (d, *J* = 8.0 Hz, **b**-1H), 7.53-7.32 (m, **a**-2H and **b**-2H), 7.18-6.60 (m, **a**-5H and **b**-5H), 4.75-4.65 (m, **a**-1H), 4.11-4.01 (m, **b**-1H), 1.35-1.72 (m, **a**-6H and **b**-6H), ppm; <sup>13</sup>C NMR (100 MHz, CDCl<sub>3</sub>): δ 163.83-**a**, 162.75-**b**, 155.89-**b**, 155.04-**a**, 148.31-**b**, 148.07-**a**, 139.80-**a**, 138.20-**b**, 137.71-**a**, 137.64-**b**, 131.33-**a**, 129.60-**a**, 129.32-**b**, 129.19-**b**, 128.90-**b**, 127.25-**b**, 123.67-**b**, 123.25-**b**, 121.70-**a**, 120.29-**a**, 115.88-**a**, 115.09-**b**, 110.38-**a**, 108.93-**b**, 52.42-**b**, 46.91-**a**, 23.53-**b**, 21.39-**a**, ppm; HRMS (ESI) calcd for C<sub>13</sub>H<sub>13</sub>N<sub>3</sub>O [M + H]<sup>+</sup> 256.1450, found 256.1446.

***N*-methyl-*N*-(2-(pyridin-2-ylamino)phenyl)formamide (C9)**

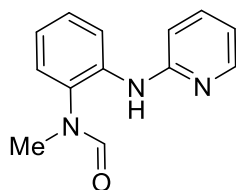

**C9** was synthesized by previously reported methods.<sup>2</sup> 3-methyl-1-(pyridin-2-yl)-1*H*-benzo[*d*]imidazol-3-ium iodide (1.0 mmol), KO<sup>*t*</sup>Bu (1.2 equiv.) and THF (9 ml) and water (1 ml) in a 50 ml reaction tube was stirred for 2 h at room temperature. The reaction mixture was added to brine (100 ml) and extracted three times with dichloromethane (3×15 ml). Purification by flash chromatography (petroleum ether:EtOAc = 5:1): a white solid (164 mg, 72%); mp = 113-115 °C; mixture of two rotamers (**a/b** = 17/3); <sup>1</sup>H NMR (400 MHz, CDCl<sub>3</sub>): δ 8.38-8.24 (m, **a**-2H and **b**-2H), 8.10 (d, *J* = 9.2 Hz, **a**-1H), 7.85 (d, *J* = 9.2 Hz, **b**-1H), 7.61-7.52 (m, **a**-1H and **b**-1H), 7.45-7.37 (m, **a**-1H and **b**-1H), 7.32-6.78 (m, **a**-5H and **b**-5H), 3.37 (s, **b**-3H), 3.26 (s, **a**-3H), ppm; <sup>13</sup>C NMR (100 MHz, CDCl<sub>3</sub>): δ 163.72-**a**, 162.73-**b**, 156.03-**b**, 155.48-**a**, 148.20-**b**, 148.04-**a**, 137.74-**a**, 137.66-**a**, 136.71-**b**, 132.16-**b**, 129.12-**a**, 128.53-**b**, 128.31-**a**, 126.93-**b**, 124.06-**b**, 123.54-**b**, 122.84-**a**, 121.63-**a**, 115.73-**b**, 115.16-**a**, 110.26-**a**, 109.42-**b**, 37.37-**b**, 32.73-**a**, ppm; HRMS (ESI) calcd for C<sub>15</sub>H<sub>17</sub>N<sub>3</sub>O [M + H]<sup>+</sup> 228.1137, found 228.1135.

***N*-propyl-*N*-(2-(pyridin-2-ylamino)vinyl)formamide (C10)**

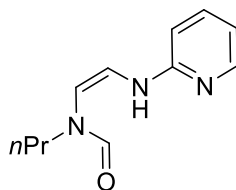

**C10** was synthesized by previously reported methods.<sup>2</sup> 3-propyl-1-(pyridin-2-yl)-1*H*-imidazol-3-ium iodide (1.0 mmol), KO<sup>*t*</sup>Bu (1.2 equiv.) and THF (9 ml) and water (1 ml) in a 50 ml reaction tube was stirred for 2 h at room temperature. The reaction mixture was added to brine (100 ml) and extracted three times with dichloromethane (3×15 ml). Purification by flash chromatography (petroleum ether:EtOAc = 5:1): a colorless liquid (178 mg, 87%); mixture of two rotamers (**a/b** = 6/3); <sup>1</sup>H NMR (400 MHz, CDCl<sub>3</sub>): δ 8.23 (d, *J* = 11.6 Hz, **b**-1H), 8.15 (d, *J* = 4.8 Hz, **a**-1H), 8.13 (s, **b**-1H), 8.07 (s, **a**-1H), 7.52 (d, *J* = 9.6 Hz, **a**-1H and **b**-1H), 7.46-7.40 (m, **a**-1H and **b**-1H), 7.36 (dd, *J* = 11.6 Hz, *J* = 6.4 Hz, **b**-1H), 6.90 (dd, *J* = 9.6 Hz, *J* = 6.8 Hz, **a**-1H), 6.80 (d, *J* = 8.4 Hz, **b**-1H), 6.72-6.67 (m, **a**-2H and **b**-2H), 6.59 (d, *J* = 8.4 Hz, **a**-1H), 5.14 (d, *J* = 6.4 Hz, **b**-1H), 4.89 (d, *J* = 7.2 Hz, **a**-1H), 3.41 (t, *J* = 7.6 Hz, **b**-2H), 3.32 (t, *J* = 6.8 Hz, **a**-2H), 1.67-1.56 (m, **a**-2H and **b**-2H), 0.90 (t, *J* = 7.2 Hz, **b**-3H), 0.88 (t, *J* = 7.6 Hz, **a**-3H), ppm; <sup>13</sup>C NMR (100 MHz, CDCl<sub>3</sub>): δ 164.09-**b**, 160.99-**a**, 153.89-**b**, 153.79-**a**, 147.89-**a**, 147.71-**b**, 137.62-**b**, 137.55-**a**, 125.13-**b**, 120.12-**a**, 115.38-**b**, 115.14-**a**, 109.89-**b**, 109.72-**a**, 103.08-**b**, 103.02-**a**, 52.09-**a**, 46.28-**b**, 22.09-**a**, 20.73-**b**, 11.31-**b**, 10.75-**a**, ppm; HRMS (ESI) calcd for C<sub>11</sub>H<sub>15</sub>N<sub>3</sub>O [M + H]<sup>+</sup> 206.1293, found 206.1296.

## 5. Characterization Data for M

**4',4',5',5'-tetramethyl-5-propyl-5a-(4,4,5,5-tetramethyl-1,3,2-dioxaborolan-2-yl)-5,5a-dihydro-6λ<sup>4</sup>,7λ<sup>4</sup>-spiro[benzo[4',5']imidazo[2',1':3,4][1,4,2]diazaborolo[1,5-*a*]pyridine-6,2'-[1,3,2]dioxaborolane] (M)**

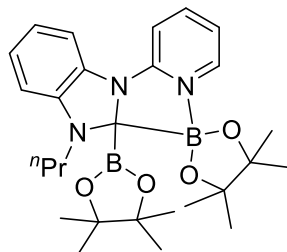

*N*-propyl-*N*-(2-(pyridin-2-ylamino)phenyl)formamide **C6** (0.5 mmol), bis(pinacolato)diboron (1.2 equiv.) and THF (2 mL) in a 50 ml reaction tube was stirred for 12 h at room temperature. Then the reaction mixture was washed with ethyl acetate, and a yellow solid was collected and dried: (156 mg, 64%); mp = 119-120 °C; Recrystallization from dichloromethane/hexane in nitrogen atmosphere gave a yellow crystal suitable for X-ray crystallographic analysis; <sup>1</sup>H NMR (400 MHz, CDCl<sub>3</sub>): δ 8.13 (d, *J* = 5.2 Hz, 1H), 7.59 (t, *J* = 8.4 Hz, 1H), 7.14 (t, *J* = 8.8 Hz, 2H), 6.91 (t, *J* = 8.8 Hz, 1H), 6.83 (t, *J* = 6.0 Hz, 1H), 6.51 (t, *J* = 6.8 Hz, 1H), 6.32 (d, *J* = 8.4 Hz, 1H), 3.27 (t, *J* = 8.4 Hz, 2H), 1.70-1.62 (m, 2H), 1.23 (s, 24H), 0.90 (t, *J* = 7.2 Hz, 3H), ppm; <sup>13</sup>C NMR (100 MHz, CDCl<sub>3</sub>): δ 159.86, 149.44, 141.66, 139.47, 135.58, 126.07, 117.37, 115.24, 114.47, 110.09, 105.33, 81.72, 48.75, 26.06, 25.83, 24.58, 22.30, 11.55, <sup>11</sup>B NMR (128 MHz, CDCl<sub>3</sub>): δ 22.02, 20.89, ppm; HRMS (ESI) calcd for C<sub>27</sub>H<sub>40</sub>B<sub>2</sub>N<sub>3</sub>O<sub>4</sub> [M + H]<sup>+</sup> 493.3283, found 493.3277.

## 6. Characterization Data for Hydroborated Products

### (*E*)-4,4,5,5-tetramethyl-2-styryl-1,3,2-dioxaborolane (2a)<sup>3</sup>

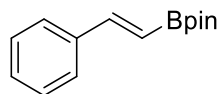

Purification by flash chromatography (petroleum ether:EtOAc = 50:1): a colorless oil (214mg, 93%); <sup>1</sup>H NMR (400 MHz, CDCl<sub>3</sub>): δ 7.49 (d, *J* = 8.4 Hz, 2H), 7.40 (d, *J* = 18.4 Hz, 1H), 7.38-7.27 (m, 3H), 6.17 (d, *J* = 18.4 Hz, 1H), 1.32 (s, 12H), ppm; <sup>13</sup>C NMR (100 MHz, CDCl<sub>3</sub>): δ 149.53, 137.49, 128.91, 128.58, 127.08, 83.37, 24.83, ppm.

### (*E*)-4,4,5,5-tetramethyl-2-(4-methylstyryl)-1,3,2-dioxaborolane (2b)<sup>3</sup>

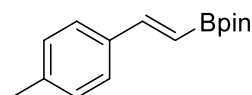

Purification by flash chromatography (petroleum ether:EtOAc = 50:1): a colorless oil (222 mg, 91%); <sup>1</sup>H NMR (400 MHz, CDCl<sub>3</sub>): δ 7.40-7.35 (m, 3H), 7.14 (d, *J* = 8.0 Hz, 2H), 6.11 (d, *J* = 18.4 Hz, 1H), 2.34 (s, 3H), 1.31 (s, 12H), ppm; <sup>13</sup>C NMR (100 MHz, CDCl<sub>3</sub>): δ 149.52, 138.95, 134.84, 129.32, 127.05, 83.27, 24.85, 21.35, ppm.

### (*E*)-4,4,5,5-tetramethyl-2-(3-methylstyryl)-1,3,2-dioxaborolane (2c)<sup>3</sup>

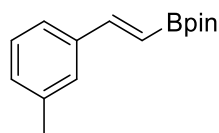

Purification by flash chromatography (petroleum ether:EtOAc = 50:1): a colorless oil (201 mg, 83%); <sup>1</sup>H NMR (400 MHz, CDCl<sub>3</sub>): δ 7.37 (d, *J* = 18.4 Hz, 1H), 7.29 (d, *J* = 5.6 Hz, 2H), 7.23 (t, *J* = 8.0 Hz, 1H), 7.11 (d, *J* = 7.2 Hz, 1H), 6.15 (d, *J* = 18.4 Hz, 1H), 2.35 (s, 3H), 1.31 (s, 12H), ppm; <sup>13</sup>C NMR (100 MHz, CDCl<sub>3</sub>): δ 148.65, 137.06, 136.44, 128.68, 127.43, 126.76, 123.22, 82.29, 23.79, 20.37, ppm.

### (*E*)-4,4,5,5-tetramethyl-2-(2-methylstyryl)-1,3,2-dioxaborolane (2d)<sup>4</sup>

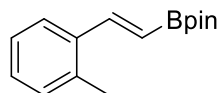

Purification by flash chromatography (petroleum ether:EtOAc = 50:1): a colorless oil (214mg, 88%); <sup>1</sup>H NMR (400 MHz, CDCl<sub>3</sub>): δ 7.65 (d, *J* = 18.4 Hz, 1H), 7.57-7.55 (m, 1H), 7.20-7.14 (m, 3H), 6.09 (d, *J* = 18.4 Hz, 1H), 2.43 (s, 3H), 1.32 (s, 12H), ppm; <sup>13</sup>C NMR (100 MHz, CDCl<sub>3</sub>): δ 147.14, 136.72, 136.31, 130.41, 128.58, 126.12, 125.79, 83.31, 24.84, 19.84, ppm.

**(E)-2-(4-ethylstyryl)-4,4,5,5-tetramethyl-1,3,2-dioxaborolane (2e)<sup>5</sup>**

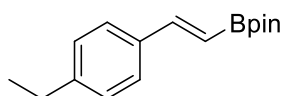

Purification by flash chromatography (petroleum ether:EtOAc = 50:1): a colorless oil (228 mg, 88%); <sup>1</sup>H NMR (400 MHz, CDCl<sub>3</sub>): δ 7.43-7.37 (m, 3H), 7.17 (d, *J* = 8.0 Hz, 2H), 6.12 (d, *J* = 18.4 Hz, 1H), 2.64 (q, *J* = 7.6 Hz, 2H), 1.32 (s, 12H), 1.23 (t, *J* = 7.6 Hz, 3H), ppm; <sup>13</sup>C NMR (100 MHz, CDCl<sub>3</sub>): δ 149.52, 145.31, 135.07, 128.11, 127.12, 83.28, 28.71, 24.83, 15.42, ppm.

**(E)-4,4,5,5-tetramethyl-2-(4-pentylstyryl)-1,3,2-dioxaborolane (2f)<sup>6</sup>**

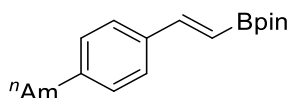

Purification by flash chromatography (petroleum ether:EtOAc = 50:1): a colorless oil (268 mg, 89%); <sup>1</sup>H NMR (400 MHz, CDCl<sub>3</sub>): δ 7.41 (d, *J* = 7.6 Hz, 2H), 7.38 (s, 1H), 7.15 (d, *J* = 8.0 Hz, 2H), 6.12 (d, *J* = 18.4 Hz, 1H), 2.60 (t, *J* = 8.0 Hz, 2H), 1.65-1.58 (m, 2H), 1.32 (s, 16H), 0.90 (t, *J* = 6.8 Hz, 3H), ppm; <sup>13</sup>C NMR (100 MHz, CDCl<sub>3</sub>): δ 149.57, 144.04, 135.05, 128.66, 127.05, 83.24, 35.78, 31.52, 31.03, 24.84, 22.57, 14.05, ppm.

**(E)-2-(4-(tert-butyl)styryl)-4,4,5,5-tetramethyl-1,3,2-dioxaborolane (2g)<sup>7</sup>**

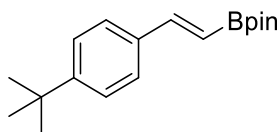

Purification by flash chromatography (petroleum ether:EtOAc = 50:1): a light yellow solid (257 mg, 90%); <sup>1</sup>H NMR (400 MHz, CDCl<sub>3</sub>): δ 7.44-7.35 (m, 5H), 6.12 (d, *J* = 18.4 Hz, 1H), 1.31 (s, 21H), ppm; <sup>13</sup>C NMR (100 MHz, CDCl<sub>3</sub>): δ 152.11, 149.44, 134.84, 126.88, 125.53, 83.26, 34.71, 31.30, 24.87, ppm.

**(E)-2-(4-methoxystyryl)-4,4,5,5-tetramethyl-1,3,2-dioxaborolane (2h)<sup>3</sup>**

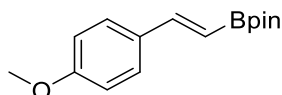

Purification by flash chromatography (petroleum ether:EtOAc = 50:1): a colorless oil (228 mg, 88%); <sup>1</sup>H NMR (400 MHz, CDCl<sub>3</sub>): δ 7.41 (d, *J* = 8.4 Hz, 2H), 7.35 (d, *J* = 18.4 Hz, 1H), 6.83 (d, *J* = 8.8 Hz, 2H), 6.00 (d, *J* = 18.4 Hz, 1H), 3.75 (s, 3H), 1.29 (s, 12H), ppm; <sup>13</sup>C NMR (100 MHz, CDCl<sub>3</sub>): δ 160.32, 149.10, 130.36, 128.44, 113.97, 83.14, 55.15, 24.80, ppm.

**(E)-2-(3-methoxystyryl)-4,4,5,5-tetramethyl-1,3,2-dioxaborolane (2i)<sup>8</sup>**

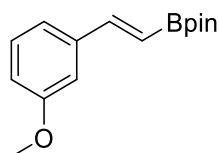

Purification by flash chromatography (petroleum ether:EtOAc = 50:1): a colorless oil (208 mg, 80%);  $^1\text{H}$  NMR (400 MHz,  $\text{CDCl}_3$ ):  $\delta$  7.37 (d,  $J$  = 18.4 Hz, 1H), 7.25 (t,  $J$  = 8.0 Hz, 1H), 7.08 (d,  $J$  = 7.6 Hz, 1H), 7.03 (s, 1H), 6.84 (dd,  $J$  = 8.4 Hz,  $J$  = 2.4 Hz, 1H), 6.16 (d,  $J$  = 18.4 Hz, 1H), 3.80 (s, 3H), 1.31 (s, 12H), ppm;  $^{13}\text{C}$  NMR (100 MHz,  $\text{CDCl}_3$ ):  $\delta$  159.79, 149.39, 138.95, 129.55, 119.83, 114.81, 111.96, 83.38, 55.17, 24.83, ppm.

**(E)-2-(2-methoxystyryl)-4,4,5,5-tetramethyl-1,3,2-dioxaborolane (2j)<sup>8</sup>**

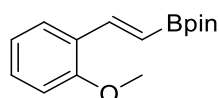

Purification by flash chromatography (petroleum ether:EtOAc = 50:1): a colorless oil (223 mg, 86%);  $^1\text{H}$  NMR (400 MHz,  $\text{CDCl}_3$ ):  $\delta$  7.77 (d,  $J$  = 18.4 Hz, 1H), 7.55 (d,  $J$  = 7.6 Hz, 1H), 7.29-7.24 (m, 1H), 6.93 (t,  $J$  = 7.2 Hz, 1H), 6.86 (d,  $J$  = 8.4 Hz, 1H), 6.17 (d,  $J$  = 18.4 Hz, 1H), 3.85 (s, 3H), 1.31 (s, 12H), ppm;  $^{13}\text{C}$  NMR (100 MHz,  $\text{CDCl}_3$ ):  $\delta$  157.35, 144.10, 129.98, 127.10, 126.60, 120.57, 110.88, 83.22, 55.36, 24.84, ppm.

**(E)-2-(4-fluorostyryl)-4,4,5,5-tetramethyl-1,3,2-dioxaborolane (2k)<sup>3</sup>**

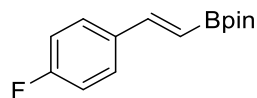

Purification by flash chromatography (petroleum ether:EtOAc = 50:1): a colorless oil (235 mg, 95%);  $^1\text{H}$  NMR (400 MHz,  $\text{CDCl}_3$ ):  $\delta$  7.45 (dd,  $J$  = 8.8 Hz,  $J$  = 5.6 Hz, 2H), 7.34 (d,  $J$  = 18.8 Hz, 1H), 7.02 (t,  $J$  = 8.8 Hz, 2H), 6.07 (d,  $J$  = 18.4 Hz, 1H), 1.31 (s, 12H), ppm;  $^{13}\text{C}$  NMR (100 MHz,  $\text{CDCl}_3$ ):  $\delta$  163.2 (d,  $J$  = 247.0 Hz), 148.17, 133.75, 128.72 (d,  $J$  = 8.0 Hz), 115.57 (d,  $J$  = 21.0 Hz), 83.41, 24.82, ppm;  $^{19}\text{F}$  NMR (376 MHz,  $\text{CDCl}_3$ ):  $\delta$  -112.41, ppm.

**(E)-2-(3-fluorostyryl)-4,4,5,5-tetramethyl-1,3,2-dioxaborolane (2l)<sup>9</sup>**

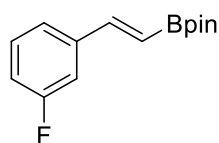

Purification by flash chromatography (petroleum ether:EtOAc = 50:1): a colorless oil (212 mg, 85%);  $^1\text{H}$  NMR (400 MHz,  $\text{CDCl}_3$ ):  $\delta$  7.40 (d,  $J$  = 18.4 Hz, 1H), 7.32-7.24 (m, 2H), 7.19 (d,  $J$  = 10.0 Hz, 1H), 6.99 (t,  $J$  = 7.6 Hz, 1H), 6.19 (d,  $J$  = 18.4 Hz, 1H), 1.33 (s, 12H), ppm;  $^{13}\text{C}$  NMR (100 MHz,  $\text{CDCl}_3$ ):  $\delta$  163.05 (d,  $J$  = 244.0 Hz), 147.99 (d,  $J$  = 2.0 Hz), 139.88 (d,  $J$  = 8.0 Hz), 129.99 (d,  $J$  = 8.0 Hz), 122.96 (d,  $J$  = 3.0 Hz), 115.60 (d,  $J$  = 22.0 Hz), 113.22 (d,  $J$  = 21.0 Hz), 83.37, 24.74, ppm.

ppm;  $^{19}\text{F}$  NMR (376 MHz,  $\text{CDCl}_3$ ):  $\delta$  -113.22, ppm.

**(E)-2-(2-fluorostyryl)-4,4,5,5-tetramethyl-1,3,2-dioxaborolane (2m)<sup>3</sup>**

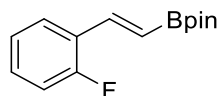

Purification by flash chromatography (petroleum ether:EtOAc = 50:1): a colorless oil (220 mg, 89%);  $^1\text{H}$  NMR (400 MHz,  $\text{CDCl}_3$ ):  $\delta$  7.61-7.54 (m, 2H), 7.28-7.23 (m, 1H), 7.11 (t,  $J$  = 7.2 Hz, 1H), 7.03 (t,  $J$  = 8.0 Hz, 1H), 6.24 (d,  $J$  = 18.8 Hz, 1H), 1.31 (s, 12H), ppm;  $^{13}\text{C}$  NMR (100 MHz,  $\text{CDCl}_3$ ):  $\delta$  160.73 (d,  $J$  = 250.0 Hz), 141.32 (d,  $J$  = 4.0 Hz), 130.19 (d,  $J$  = 9.0 Hz), 127.41 (d,  $J$  = 3.0 Hz), 125.40 (d,  $J$  = 12.0 Hz), 124.11 (d,  $J$  = 4.0 Hz), 115.83 (d,  $J$  = 22.0 Hz), 83.46, 24.82, ppm;  $^{19}\text{F}$  NMR (376 MHz,  $\text{CDCl}_3$ ):  $\delta$  -117.65, ppm.

**(E)-2-(4-chlorostyryl)-4,4,5,5-tetramethyl-1,3,2-dioxaborolane (2n)<sup>3</sup>**

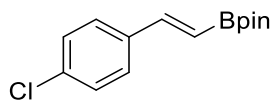

Purification by flash chromatography (petroleum ether:EtOAc = 50:1): a white solid (244 mg, 92%);  $^1\text{H}$  NMR (400 MHz,  $\text{CDCl}_3$ ):  $\delta$  7.40 (d,  $J$  = 8.4 Hz, 2H), 7.33 (d,  $J$  = 18.4 Hz, 1H), 7.30 (d,  $J$  = 8.4 Hz, 2H), 6.13 (d,  $J$  = 18.4 Hz, 1H), 1.31 (s, 12H), ppm;  $^{13}\text{C}$  NMR (100 MHz,  $\text{CDCl}_3$ ):  $\delta$  148.03, 135.98, 134.62, 128.81, 128.24, 83.47, 24.82, ppm.

**(E)-2-(3-chlorostyryl)-4,4,5,5-tetramethyl-1,3,2-dioxaborolane (2o)<sup>10</sup>**

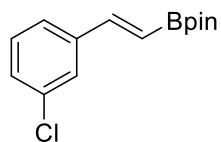

Purification by flash chromatography (petroleum ether:EtOAc = 50:1): a colorless oil (213 mg, 81%);  $^1\text{H}$  NMR (400 MHz,  $\text{CDCl}_3$ ):  $\delta$  7.35 (s, 1H), 7.24-7.14 (m, 4H), 6.04 (d,  $J$  = 18.4 Hz, 1H), 1.21 (s, 12H), ppm;  $^{13}\text{C}$  NMR (100 MHz,  $\text{CDCl}_3$ ):  $\delta$  147.77, 139.36, 134.56, 129.79, 128.71, 126.90, 125.17, 83.40, 24.79, ppm.

**(E)-2-(2-chlorostyryl)-4,4,5,5-tetramethyl-1,3,2-dioxaborolane (2p)<sup>11</sup>**

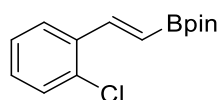

Purification by flash chromatography (petroleum ether:EtOAc = 50:1): a colorless oil (226 mg, 85%);  $^1\text{H}$  NMR (400 MHz,  $\text{CDCl}_3$ ):  $\delta$  7.70 (d,  $J$  = 18.4 Hz, 1H), 7.55 (dd,  $J$  = 7.2 Hz,  $J$  = 2.0 Hz, 1H), 7.27 (dd,  $J$  = 7.6 Hz,  $J$  = 1.6 Hz, 1H), 7.18-7.11 (m, 2H), 6.09 (d,  $J$  = 18.0 Hz, 1H), 1.24 (s, 12H), ppm;  $^{13}\text{C}$  NMR (100 MHz,  $\text{CDCl}_3$ ):  $\delta$  144.97, 135.63, 133.86, 129.80, 129.68, 127.03, 126.86, 83.50, 24.83, ppm.

**(E)-2-(4-bromostyryl)-4,4,5,5-tetramethyl-1,3,2-dioxaborolane (2q)<sup>3</sup>**

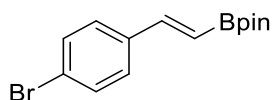

Purification by flash chromatography (petroleum ether:EtOAc = 50:1): a white solid (263 mg, 85%); <sup>1</sup>H NMR (400 MHz, CDCl<sub>3</sub>): δ 7.46 (d, *J* = 8.4 Hz, 2H), 7.35-7.29 (m, 3H), 6.15 (d, *J* = 18.4 Hz, 1H), 1.31 (s, 12H), ppm; <sup>13</sup>C NMR (100 MHz, CDCl<sub>3</sub>): δ 148.08, 136.41, 131.77, 128.52, 122.91, 83.49, 24.82, ppm.

**(E)-4,4,5,5-tetramethyl-2-(4-(trifluoromethyl)styryl)-1,3,2-dioxaborolane (2r)<sup>3</sup>**

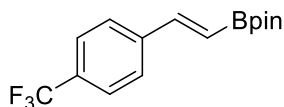

Purification by flash chromatography (petroleum ether:EtOAc = 50:1): a colorless oil (273 mg, 92%); <sup>1</sup>H NMR (400 MHz, CDCl<sub>3</sub>): δ 7.58 (dd, *J* = 8.4 Hz, *J* = 8.4 Hz, 4H), 7.40 (d, *J* = 18.4 Hz, 1H), 6.26 (d, *J* = 18.4 Hz, 1H), 1.32 (s, 12H), ppm; <sup>13</sup>C NMR (100 MHz, CDCl<sub>3</sub>): δ 147.68, 140.80, 130.47 (d, *J* = 32.0 Hz), 127.16, 125.53 (q, *J* = 4.0 Hz), 122.79-122.67 (m), 83.62, 24.82, ppm; <sup>19</sup>F NMR (376 MHz, CDCl<sub>3</sub>): δ -62.64, ppm.

**(E)-2-(2-(4,4,5,5-tetramethyl-1,3,2-dioxaborolan-2-yl)vinyl)pyridine (2s)<sup>9, 12</sup>**

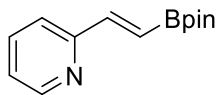

Purification by flash chromatography (petroleum ether:EtOAc = 20:1): a colorless oil (194 mg, 84%); <sup>1</sup>H NMR (400 MHz, CDCl<sub>3</sub>): δ 8.59 (d, *J* = 4.4 Hz, 1H), 7.64 (t, *J* = 18.4 Hz, 1H), 7.45 (d, *J* = 18.4 Hz, 1H), 7.39 (d, *J* = 7.6 Hz, 1H), 7.16 (t, *J* = 4.8 Hz, 1H), 6.62 (d, *J* = 18.4 Hz, 1H), 1.30 (s, 12H), ppm; <sup>13</sup>C NMR (100 MHz, CDCl<sub>3</sub>): δ 155.44, 149.72, 148.75, 136.48, 123.08, 122.23, 83.48, 24.80, ppm.

**(E)-2-(4-ethynylstyryl)-4,4,5,5-tetramethyl-1,3,2-dioxaborolane (2t)<sup>13</sup>**

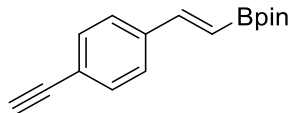

Purification by flash chromatography (petroleum ether:EtOAc = 20:1): a white solid (187 mg, 74%); <sup>1</sup>H NMR (400 MHz, CDCl<sub>3</sub>): δ 7.42 (dd, *J* = 11.6 Hz, *J* = 8.8 Hz, 4H), 7.35 (d, *J* = 18.4 Hz, 1H), 6.16 (d, *J* = 18.4 Hz, 1H), 3.12 (s, 1H), 1.28 (s, 12H), ppm; <sup>13</sup>C NMR (100 MHz, CDCl<sub>3</sub>): δ 148.40, 137.81, 132.35, 126.90, 122.45, 83.57, 83.40, 78.47, 24.81, ppm.

**(E)-2-(2-cyclopropylvinyl)-4,4,5,5-tetramethyl-1,3,2-dioxaborolane (2u)<sup>8</sup>**

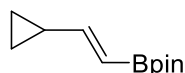

Purification by flash chromatography (petroleum ether:EtOAc = 50:1): a colorless oil (165 mg, 91%);  $^1\text{H}$  NMR (400 MHz,  $\text{CDCl}_3$ ):  $\delta$  6.04 (dd,  $J = 18.0$  Hz,  $J = 9.6$  Hz, 1H), 5.46 (d,  $J = 17.6$  Hz, 1H), 1.53-1.45 (m, 1H), 1.23 (s, 12H), 0.77 (dd,  $J = 13.6$  Hz,  $J = 4.0$  Hz, 2H), 0.51 (dd,  $J = 10.8$  Hz,  $J = 4.4$  Hz, 2H), ppm;  $^{13}\text{C}$  NMR (100 MHz,  $\text{CDCl}_3$ ):  $\delta$  158.53, 82.89, 24.74, 17.00, 7.87, ppm.

**(E)-2-(3-(benzyloxy)prop-1-en-1-yl)-4,4,5,5-tetramethyl-1,3,2-dioxaborolane (2v)<sup>14</sup>**

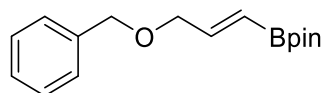

Purification by flash chromatography (petroleum ether:EtOAc = 50:1): a colorless oil (215 mg, 78%);  $^1\text{H}$  NMR (400 MHz,  $\text{CDCl}_3$ ):  $\delta$  7.35-7.26 (m, 5H), 6.68 (dt,  $J = 18.0$  Hz,  $J = 4.8$  Hz, 1H), 5.76 (d,  $J = 18.4$  Hz, 1H), 4.54 (s, 2H), 4.11 (d,  $J = 4.8$  Hz, 2H), 1.27 (s, 12H), ppm;  $^{13}\text{C}$  NMR (100 MHz,  $\text{CDCl}_3$ ):  $\delta$  149.16, 138.29, 128.36, 127.62, 127.57, 83.29, 72.33, 71.70, 24.79, ppm.

**N-(1-(naphthalen-1-yl)ethyl)-3-(4,4,5,5-tetramethyl-1,3,2-dioxaborolan-2-yl)prop-2-en-1-amine (2w)<sup>8</sup>**

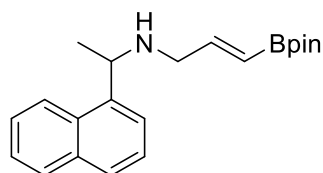

Purification by flash chromatography (petroleum ether:EtOAc = 5:1): a colorless oil (261 mg, 77%);  $^1\text{H}$  NMR (400 MHz,  $\text{CDCl}_3$ ):  $\delta$  8.18 (d,  $J = 8.0$  Hz, 1H), 7.86 (d,  $J = 7.6$  Hz, 1H), 7.74 (d,  $J = 8.4$  Hz, 1H), 7.67 (d,  $J = 6.8$  Hz, 1H), 7.52-7.45 (m, 3H), 6.72 (dt,  $J = 18.4$  Hz,  $J = 5.2$  Hz, 1H), 5.63 (d,  $J = 18.0$  Hz, 1H), 4.67 (q,  $J = 6.4$  Hz, 1H), 3.35-3.25 (m, 2H), 1.70 (s, 1H), 1.49 (d,  $J = 6.8$  Hz, 3H), 1.27 (s, 12H), ppm;  $^{13}\text{C}$  NMR (100 MHz,  $\text{CDCl}_3$ ):  $\delta$  151.93, 141.00, 133.99, 131.34, 128.95, 127.20, 125.74, 125.29, 123.01, 122.78, 83.19, 53.08, 51.41, 24.80, 24.79, 23.68, ppm.

**(E)-4,4,5,5-tetramethyl-2-(2-(phenanthren-9-yl)vinyl)-1,3,2-dioxaborolane (2x)<sup>15</sup>**

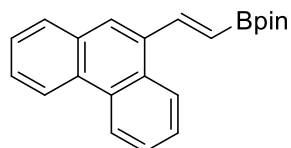

Purification by flash chromatography (petroleum ether:EtOAc = 50:1): a colorless oil (261 mg, 79%);  $^1\text{H}$  NMR (400 MHz,  $\text{CDCl}_3$ ):  $\delta$  8.72 (d,  $J = 8.4$  Hz, 1H), 8.65 (d,  $J = 8.0$  Hz, 1H), 8.28 (d,  $J = 7.6$  Hz, 1H), 8.20 (d,  $J = 18.4$  Hz, 1H), 7.95 (s, 1H), 7.89 (d,  $J = 7.6$  Hz, 1H), 7.69-7.56 (m, 4H), 6.34 (d,  $J = 18.0$  Hz, 1H), 1.37 (s, 12H), ppm;  $^{13}\text{C}$  NMR (100 MHz,  $\text{CDCl}_3$ ):  $\delta$  147.21, 134.61, 131.64, 130.62, 130.34, 130.29, 129.05, 126.90, 126.78, 126.67, 126.53, 125.37, 124.70, 123.04, 122.52, 83.49, 24.91, ppm.

**(E)-4,4,5,5-tetramethyl-2-(2-(naphthalen-1-yl)vinyl)-1,3,2-dioxaborolane (2y)<sup>12</sup>**

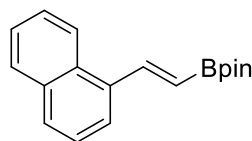

Purification by flash chromatography (petroleum ether:EtOAc = 50:1): a colorless oil (238 mg, 85%); <sup>1</sup>H NMR (400 MHz, CDCl<sub>3</sub>): δ 8.26 (d, *J* = 8.4 Hz, 1H), 8.21 (d, *J* = 18.4 Hz, 1H), 7.85-7.79 (m, 2H), 7.73 (d, *J* = 7.2 Hz, 1H), 7.53-7.54 (m, 3H), 6.26 (d, *J* = 18.4 Hz, 1H), 1.34 (s, 12H), ppm; <sup>13</sup>C NMR (100 MHz, CDCl<sub>3</sub>): δ 146.48, 135.39, 133.65, 131.14, 129.06, 128.53, 126.20, 125.83, 125.62, 124.11, 123.81, 83.45, 24.91, ppm.

**(E)-4,4,5,5-tetramethyl-2-(2-(thiophen-2-yl)vinyl)-1,3,2-dioxaborolane (2z)<sup>8</sup>**

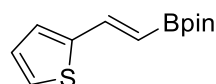

Purification by flash chromatography (petroleum ether:EtOAc = 50:1): a yellow oil (128 mg, 54%); <sup>1</sup>H NMR (400 MHz, CDCl<sub>3</sub>): δ 7.47 (d, *J* = 18.0 Hz, 1H), 7.24 (d, *J* = 5.2 Hz, 1H), 7.08 (d, *J* = 3.2 Hz, 1H), 6.98 (dd, *J* = 5.2 Hz, *J* = 3.6 Hz, 1H), 5.91 (d, *J* = 18.0 Hz, 1H), 1.30 (s, 12H), ppm; <sup>13</sup>C NMR (100 MHz, CDCl<sub>3</sub>): δ 143.97, 141.83, 127.72, 127.64, 126.32, 83.40, 24.82, ppm.

**(E)-2-(2-cyclohexylvinyl)-4,4,5,5-tetramethyl-1,3,2-dioxaborolane (2aa)<sup>11</sup>**

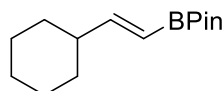

Purification by flash chromatography (petroleum ether:EtOAc = 50:1): a colorless oil (210 mg, 89%); <sup>1</sup>H NMR (400 MHz, CDCl<sub>3</sub>): δ 6.58 (dd, *J* = 18.4 Hz, *J* = 6.4 Hz, 1H), 5.38 (dd, *J* = 18.0 Hz, *J* = 1.6 Hz, 1H), 2.04-2.00 (m, 1H), 1.76-1.70 (m, 4H), 1.67-1.62 (m, 1H), 1.27 (s, 12H), 1.25-1.04 (m, 5H), ppm; <sup>13</sup>C NMR (100 MHz, CDCl<sub>3</sub>): δ 159.88, 82.99, 43.26, 31.93, 26.18, 25.98, 24.80, ppm.

**(Z)-4,4,5,5-tetramethyl-2-(1-phenylprop-1-en-2-yl)-1,3,2-dioxaborolane (2bb)<sup>7</sup>**

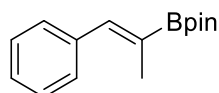

Purification by flash chromatography (petroleum ether:EtOAc = 50:1): a colorless oil (185 mg, 76%); <sup>1</sup>H NMR (400 MHz, CDCl<sub>3</sub>): δ 7.40-7.32 (m, 4H), 7.26-7.22 (m, 2H), 1.99 (s, 3H), 1.32 (s, 12H), ppm; <sup>13</sup>C NMR (100 MHz, CDCl<sub>3</sub>): δ 141.34, 136.92, 128.39, 127.01, 126.06, 82.49, 23.83, 14.87, ppm.

**(Z)-2-(1,2-diphenylvinyl)-4,4,5,5-tetramethyl-1,3,2-dioxaborolane (2cc)<sup>16</sup>**

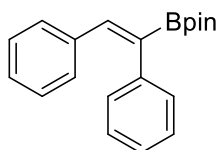

Purification by flash chromatography (petroleum ether: EtOAc = 50:1): a white solid (162 mg, 53%); <sup>1</sup>H NMR (400 MHz, CDCl<sub>3</sub>): δ 7.36 (s, 1H), 7.28-7.24 (m, 2H), 7.22-7.20 (m, 1H), 7.18-7.15 (m, 2H), 7.12-7.10 (m, 3H), 7.07-7.04 (m, 2H), 1.31 (s, 12H), ppm; <sup>13</sup>C NMR (100 MHz, CDCl<sub>3</sub>): δ 143.20, 140.47, 137.02, 129.98, 128.88, 128.27, 127.87, 127.61, 126.28, 83.82, 24.82, ppm.

**1,3-diphenyl-3-(4,4,5,5-tetramethyl-1,3,2-dioxaborolan-2-yl)propan-1-one (2dd)<sup>17</sup>**

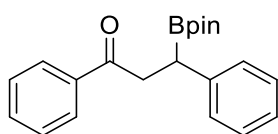

Purification by flash chromatography (petroleum ether: EtOAc = 10:1): a white solid (289 mg, 86%); <sup>1</sup>H NMR (400 MHz, CDCl<sub>3</sub>): δ 7.96 (d, *J* = 7.6 Hz, 2H), 7.53 (t, *J* = 7.6 Hz, 1H), 7.43 (t, *J* = 7.6 Hz, 2H), 7.32-7.24 (m, 4H), 7.16 (t, *J* = 5.4 Hz, 1H), 3.59-3.39 (m, 2H), 2.82-2.76 (m, 1H), 1.24 (s, 6H), 1.16 (s, 6H), ppm; <sup>13</sup>C NMR (100 MHz, CDCl<sub>3</sub>): δ 199.70, 141.98, 136.82, 132.94, 128.54, 128.51, 128.41, 128.07, 125.62, 83.40, 43.29, 24.60, 24.56, ppm.

**(E)-4,4,6-trimethyl-2-styryl-1,3,2-dioxaborinane (2ee)<sup>18</sup>**

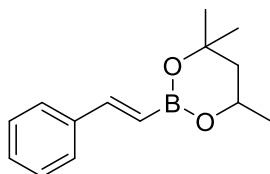

Purification by flash chromatography (petroleum ether:EtOAc = 50:1): a colorless oil (217 mg, 94%); <sup>1</sup>H NMR (400 MHz, CDCl<sub>3</sub>): δ 7.40 (d, *J* = 7.2 Hz, 2H), 7.25-7.14 (m, 4H), 6.03 (d, *J* = 18.4 Hz, 1H), 4.23-4.15 (m, 1H), 1.73 (dd, *J* = 14.0 Hz, *J* = 2.8 Hz, 1H), 1.47 (t, *J* = 13.6 Hz, 1H), 1.27-1.23 (m, 9H), ppm; <sup>13</sup>C NMR (100 MHz, CDCl<sub>3</sub>): δ 145.45, 136.98, 127.41, 127.25, 125.92, 69.85, 63.80, 44.98, 30.25, 27.13, 22.17, ppm.

**(E)-5,5-dimethyl-2-styryl-1,3,2-dioxaborinane (2ff)<sup>19</sup>**

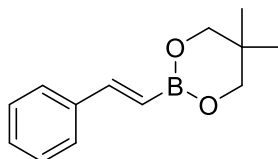

Purification by flash chromatography (petroleum ether:EtOAc = 50:1): a colorless oil (189 mg, 88%); <sup>1</sup>H NMR (400 MHz, CDCl<sub>3</sub>): δ 7.49 (d, *J* = 7.6 Hz, 2H), 7.39-7.22 (m, 4H), 6.14 (d, *J* =

18.0 Hz, 1H), 3.66 (s, 4H), 0.96 (s, 6H), ppm;  $^{13}\text{C}$  NMR (100 MHz,  $\text{CDCl}_3$ ):  $\delta$  146.04, 136.74, 127.45, 125.90, 119.86 (br), 71.01, 30.68, 20.74, ppm.

## 7. Characterization Data for Functionalized Products

### Cinnarizine (3a)

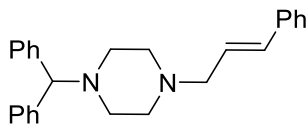

**3a** was synthesized by previously reported methods.<sup>20</sup> A mixture of **2a** (1 mmol), NaIO<sub>4</sub> (3 mmol) and 2N HCl (1 mL) in THF (4 mL) and H<sub>2</sub>O (1 mL) was combined under air. The reaction mixture was stirred at room temperature for 12 h. Then the reaction mixture was extracted with saturated saline and ethyl acetate. The organic liquid layer was collected for rotary evaporation to obtain a white solid boric acid crude product. Without purification, it was directly mixed with 1-benzhydrylpiperazine (1 mmol) and paraformaldehyde (1 mmol), heated to 90 °C in 1,2-dioxane and stirred for 24 h. Purification by flash chromatography (petroleum ether:EtOAc = 5:1): a white solid (287 mg, 78%); <sup>1</sup>H NMR (400 MHz, CDCl<sub>3</sub>): δ 7.40 (d, *J* = 7.2 Hz, 4H), 7.34 (d, *J* = 7.2 Hz, 2H), 7.29-7.21 (m, 7H), 7.19-7.15 (m, 2H), 6.49 (d, *J* = 15.6 Hz, 1H), 6.30-6.22 (m, 1H), 4.23 (s, 1H), 3.15 (d, *J* = 6.8 Hz, 2H), 2.53 (s, 8H), ppm; <sup>13</sup>C NMR (100 MHz, CDCl<sub>3</sub>): δ 142.80, 137.03, 133.04, 128.60, 128.50, 128.00, 127.49, 126.94, 126.68, 126.36, 76.24, 61.10, 53.53, 51.93, ppm.

### (*E*)-(2-iodovinyl)benzene (3b)

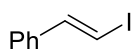

**3b** was synthesized by previously reported methods.<sup>21</sup> A mixture of **2a** (1 mmol), I<sub>2</sub> (2 mmol) and NaOH (3 mmol) in THF (4 mL) was combined under air. The reaction mixture was stirred at room temperature for 2 h. Purification by flash chromatography (petroleum ether): a yellow oil (216 mg, 94%); <sup>1</sup>H NMR (400 MHz, CDCl<sub>3</sub>): δ 7.43 (d, *J* = 14.8 Hz, 1H), 7.35-7.28 (m, 5H), 6.83 (d, *J* = 14.8 Hz, 1H), ppm; <sup>13</sup>C NMR (100 MHz, CDCl<sub>3</sub>): δ 145.03, 137.72, 128.74, 128.40, 126.02, 76.63, ppm.

### (*E*)-5,5-dimethyl-2-styryl-1,3,2-dioxaborinane (2ff)

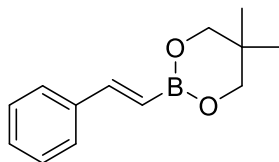

**2ff** was synthesized by previously reported methods.<sup>22</sup> A mixture of **2a** (1 mmol) and B<sub>2</sub>nep<sub>2</sub> (2 mmol) in MeOH (2 mL) was combined in sealed tube. The reaction mixture was stirred at 90 °C for 16 h. Purification by flash chromatography (petroleum ether:EtOAc = 50:1): a colorless oil (140 mg, 65%).

### (1*E*,3*E*)-1,4-diphenylbuta-1,3-diene (3c)

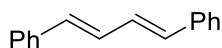

**3c** was synthesized by previously reported methods.<sup>23</sup> A mixture of **2a** (1 mmol) and Cu(OAc)<sub>2</sub> (1 mmol) in DMF (2 mL) and EtOH (1 mL) was combined under air. The reaction mixture was stirred at room temperature for 16 h. Purification by flash chromatography (petroleum ether:EtOAc = 50:1): a white solid (91 mg, 44%); <sup>1</sup>H NMR (400 MHz, CDCl<sub>3</sub>): δ 7.44 (d, *J* = 7.2 Hz, 4H), 7.33 (t, *J* = 7.6 Hz, 4H), 7.23 (t, *J* = 7.6 Hz, 2H), 6.98-6.92 (m, 2H), 6.71-6.64 (m, 2H), ppm; <sup>13</sup>C NMR (100 MHz, CDCl<sub>3</sub>): δ 137.40, 132.85, 129.28, 128.69, 127.59, 126.41, ppm.

## 8. References

1. (a) L. Wang, N. Liu, B. Dai and H. Hu, Selective C–N Bond-Forming Reaction of 2,6-Dibromopyridine with Amines. *Eur. J. Org. Chem.*, 2014, **2014**, 6493-6500; (b) F. Chen, D. Chen, L. Shi, N. Liu and B. Dai, "Fiddler crab-type" imidazolium salt as remote substituents tuning organocatalyst for the cycloaddition of epoxides with carbon dioxide. *J. CO<sub>2</sub> Util.*, 2016, **16**, 391-398.
2. Y.-B. Wang, B.-Y. Liu, Q. Bu, B. Dai and N. Liu, In Situ Ring-Closing Strategy for Direct Synthesis of N-Heterocyclic Carbene Nickel Complexes and Their Application in Coupling of Allylic Alcohols with Aryl Boronic Acids. *Adv. Synth. Catal.*, 2020, **362**, 2930-2940.
3. Y. Wang, R. Guan, P. Sivaguru, X. Cong and X. Bi, Silver-Catalyzed anti-Markovnikov Hydroboration of C–C Multiple Bonds. *Org. Lett.*, 2019, **21**, 4035-4038.
4. X. Qiu, Y. Li, L. Zhou, P. Chen, F. Li, Y. Zhang and Y. Ling, Nickel(II)-Catalyzed Borylation of Alkenyl Methyl Ethers via C–O Bond Cleavage. *Org. Lett.*, 2020, **22**, 6424-6428.
5. A. Bismuto, S. P. Thomas and M. J. Cowley, Aluminum Hydride Catalyzed Hydroboration of Alkynes. *Angew. Chem. Int. Ed.*, 2016, **55**, 15356-15359.
6. N. N. H. Ton, B. K. Mai and T. V. Nguyen, Tropylium-Promoted Hydroboration Reactions: Mechanistic Insights Via Experimental and Computational Studies. *J. Org. Chem.*, 2021, **86**, 9117-9133.
7. M. Fleige, J. Möbus, T. vom Stein, F. Glorius and D. W. Stephan, Lewis acid catalysis: catalytic hydroboration of alkynes initiated by Piers' borane. *Chem. Commun.*, 2016, **52**, 10830-10833.
8. W.-H. Li, J. Yang, H. Jing, J. Zhang, Y. Wang, J. Li, J. Zhao, D. Wang and Y. Li, Creating High Regioselectivity by Electronic Metal–Support Interaction of a Single-Atomic-Site Catalyst. *J. Am. Chem. Soc.*, 2021, **143**, 15453-15461.
9. J. Zhao, Z. Niu, H. Fu and Y. Li, Ligand-free hydroboration of alkynes catalyzed by heterogeneous copper powder with high efficiency. *Chem. Commun.*, 2014, **50**, 2058-2060.
10. M. Haberberger and S. Enthaler, Straightforward Iron-Catalyzed Synthesis of Vinylboronates by the Hydroboration of Alkynes. *Chem. Asian J.*, 2013, **8**, 50-54.
11. M. Magre, B. Maity, A. Falconnet, L. Cavallo and M. Rueping, Magnesium-Catalyzed Hydroboration of Terminal and Internal Alkynes. *Angew. Chem. Int. Ed.*, 2019, **58**, 7025-7029.
12. W. Lu and Z. Shen, Direct Synthesis of Alkenylboronates from Alkenes and Pinacol Diboron via Copper Catalysis. *Org. Lett.*, 2019, **21**, 142-146.
13. S. Mandal, S. Mandal and K. Geetharani, Zinc-Catalysed Hydroboration of Terminal and Internal Alkynes. *Chem. Asian J.*, 2019, **14**, 4553-4556.
14. J. I. Martínez, J. J. Smith, H. B. Hepburn and H. W. Lam, Chain Walking of Allylrhodium Species Towards Esters During Rhodium-Catalyzed Nucleophilic Allylations of Imines. *Angew. Chem. Int. Ed.*, 2016, **55**, 1108-1112.
15. R. Mamidala, V. K. Pandey and A. Rit, AgSbF<sub>6</sub>-Catalyzed anti-Markovnikov hydroboration of terminal alkynes. *Chem. Commun.*, 2019, **55**, 989-992.
16. H.-J. Lee, Y. Yonekura, N. Kim, J.-i. Yoshida and H. Kim, Regioselective Synthesis of  $\alpha$ -Functional Stilbenes via Precise Control of Rapid cis–trans Isomerization in Flow. *Org. Lett.*, 2021, **23**, 2904-2910.
17. J. D. Grayson and B. M. Partridge, Mild Cu-Catalyzed Oxidation of Benzylic Boronic Esters to

- Ketones. *ACS Catal.*, 2019, **9**, 4296-4301.
18. N. PraveenGanesh, S. d'Hond and P. Y. Chavant, Methylpentanediolborane: Easy Access to New Air- and Chromatography-Stable, Highly Functionalized Vinylboronates. *J. Org. Chem.*, 2007, **72**, 4510-4514.
  19. P. R. Blakemore, S. P. Marsden and H. D. Vater, Reagent-Controlled Asymmetric Homologation of Boronic Esters by Enantioenriched Main-Group Chiral Carbenoids. *Org. Lett.*, 2006, **8**, 773-776.
  20. (a) Y. Ma, B. R. P. Reddy and X. Bi, Coupling of Trifluoroacetaldehyde N-Triftosylhydrazone with Organoboronic Acids for the Synthesis of gem-Difluoroalkenes. *Org. Lett.*, 2019, **21**, 9860-9863;  
(b) B. Wang, L. Gao, H. Yang and G. Zheng, Regio- and Stereoselective Syn-Boronation of Terminal Alkynes Catalyzed by Copper Nanospheres on Graphene Nanosheets. *ACS Appl. Mater. Interfaces*, 2021, **13**, 47530-47540.
  21. C. Morrill and R. H. Grubbs, Synthesis of Functionalized Vinyl Boronates via Ruthenium-Catalyzed Olefin Cross-Metathesis and Subsequent Conversion to Vinyl Halides. *J. Org. Chem.*, 2003, **68**, 6031-6034.
  22. P. Dominguez-Molano, G. Bru, O. Salvado, R. J. Maza, J. J. Carbó and E. Fernández, Transborylation of alkenylboranes with diboranes. *Chem. Commun.*, 2021, **57**, 13361-13364.
  23. X. Shi, S. Li and L. Wu, H<sub>2</sub>-Acceptorless Dehydrogenative Boration and Transfer Boration of Alkenes Enabled by Zirconium Catalyst. *Angew. Chem. Int. Ed.*, 2019, **58**, 16167-16171.

## 9. NMR Spectra for Catalysts

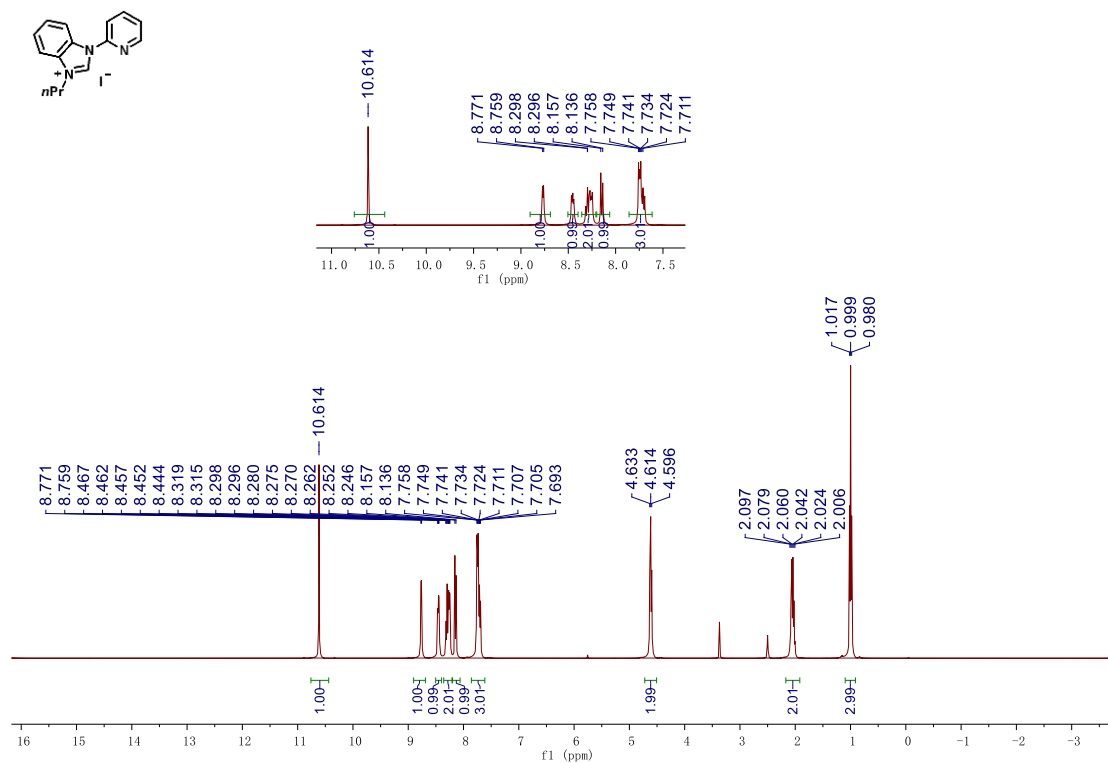

**Figure S1.** <sup>1</sup>H NMR (400 MHz, DMSO-*d*<sub>6</sub>) spectrum of compound **C5**.

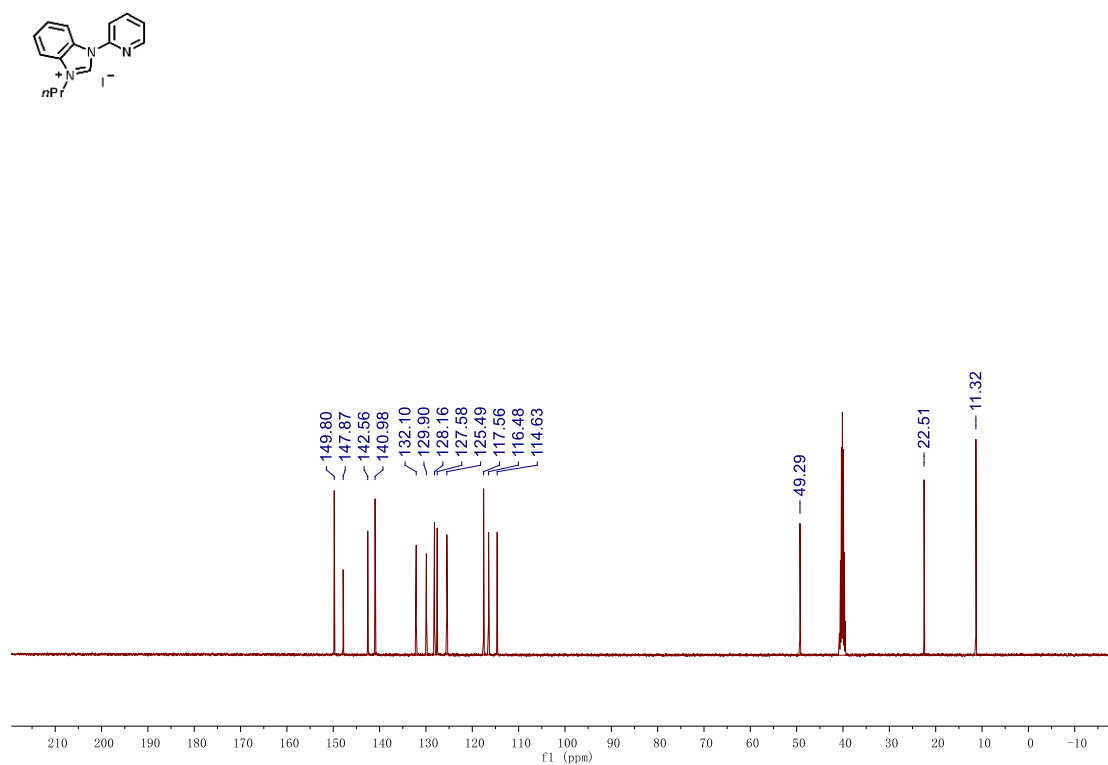

**Figure S2.** <sup>13</sup>C NMR (100 MHz, DMSO-*d*<sub>6</sub>) spectrum of compound **C5**.

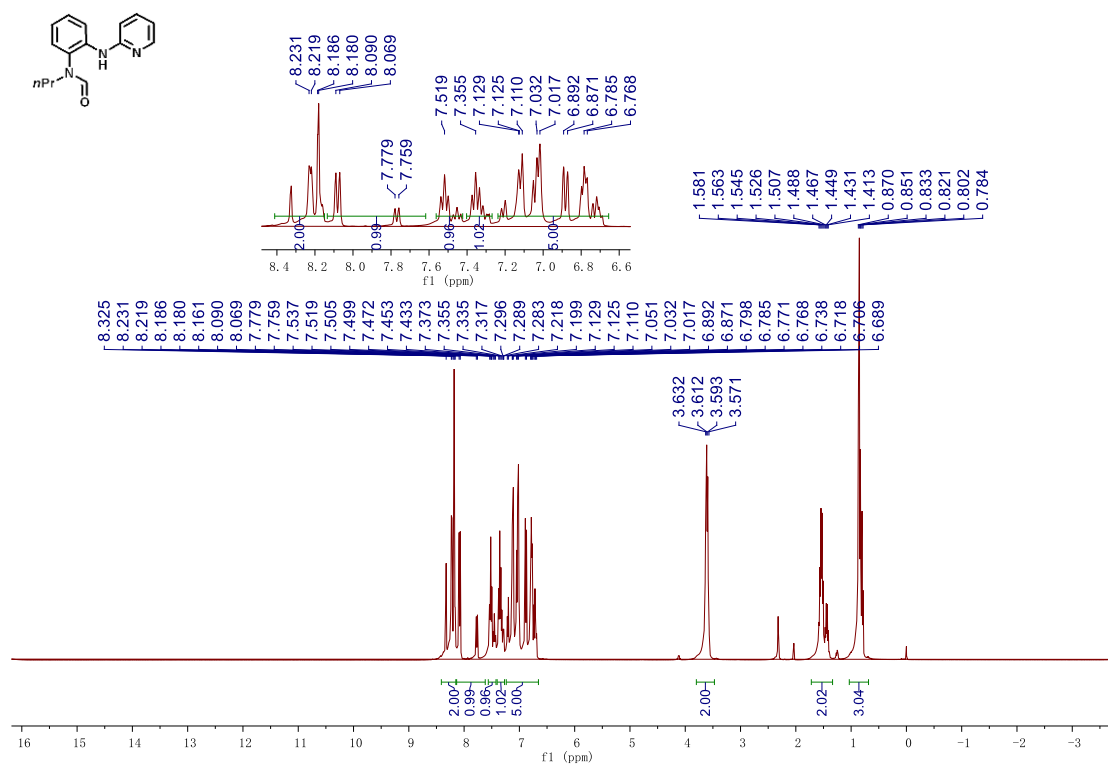

**Figure S3.** <sup>1</sup>H NMR (400 MHz, CDCl<sub>3</sub>) spectrum of compound **C6**.

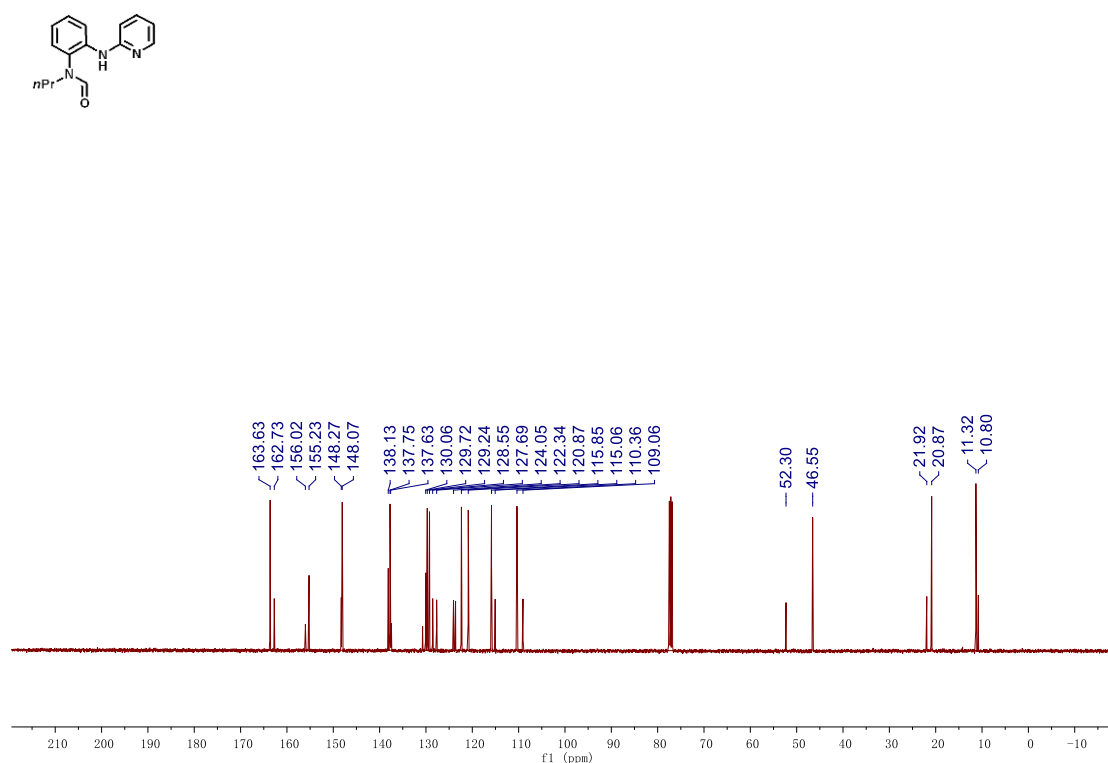

**Figure S4.** <sup>13</sup>C NMR (100 MHz, CDCl<sub>3</sub>) spectrum of compound **C6**.

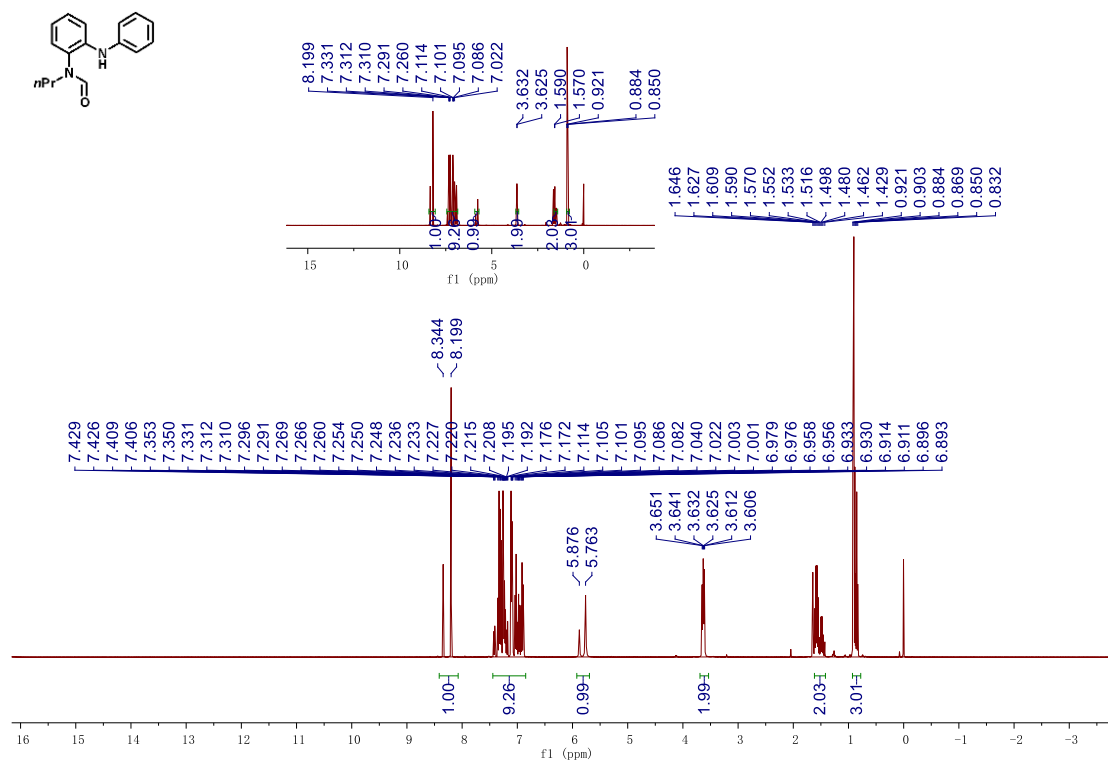

**Figure S5.** <sup>1</sup>H NMR (400 MHz, CDCl<sub>3</sub>) spectrum of compound **C7**.

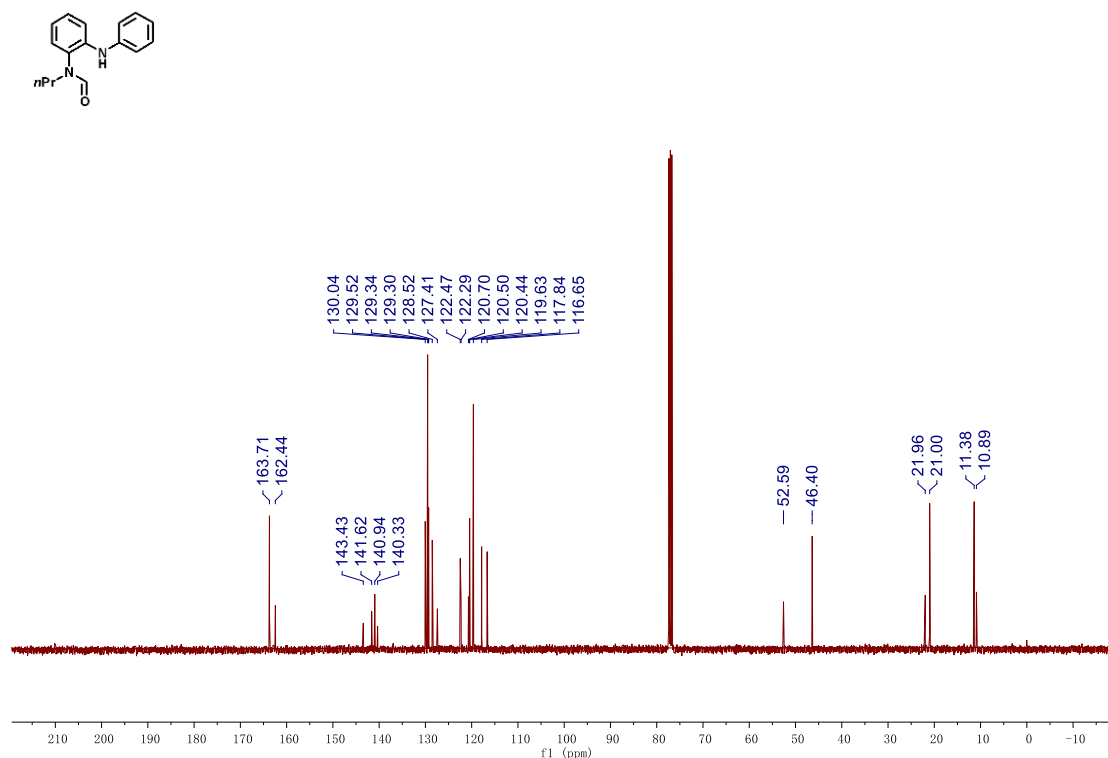

**Figure S6.** <sup>13</sup>C NMR (100 MHz, CDCl<sub>3</sub>) spectrum of compound **C7**.

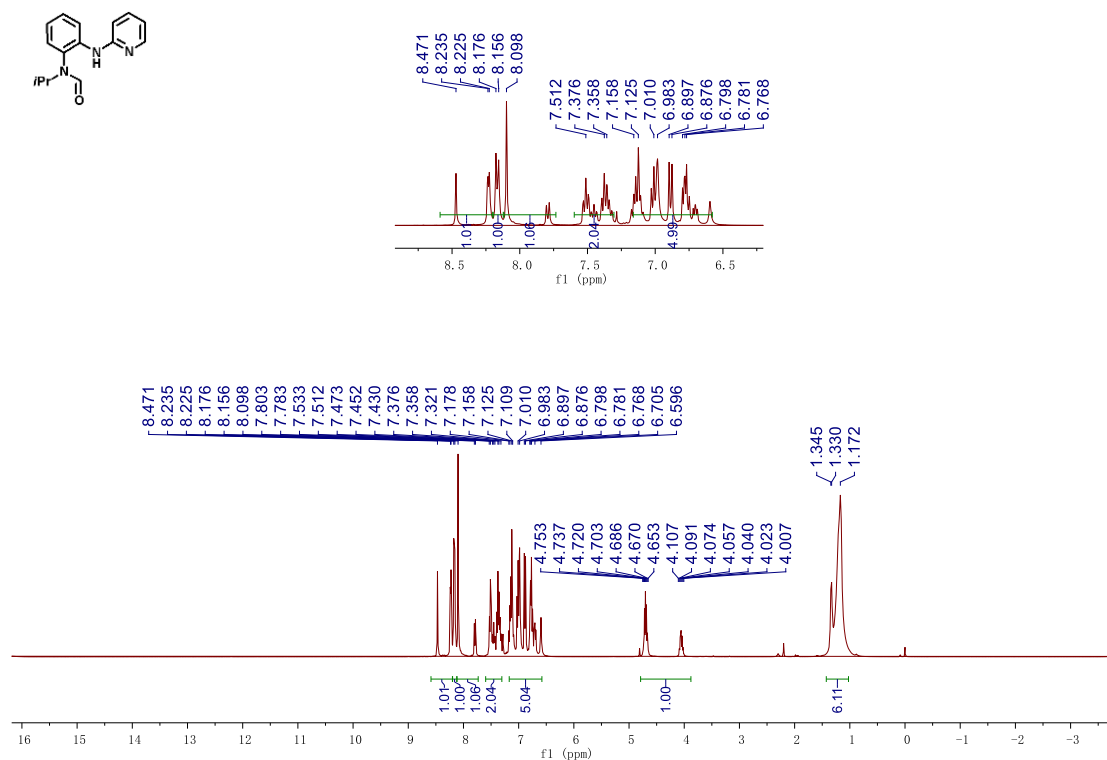

**Figure S7.** <sup>1</sup>H NMR (400 MHz, CDCl<sub>3</sub>) spectrum of compound C8.

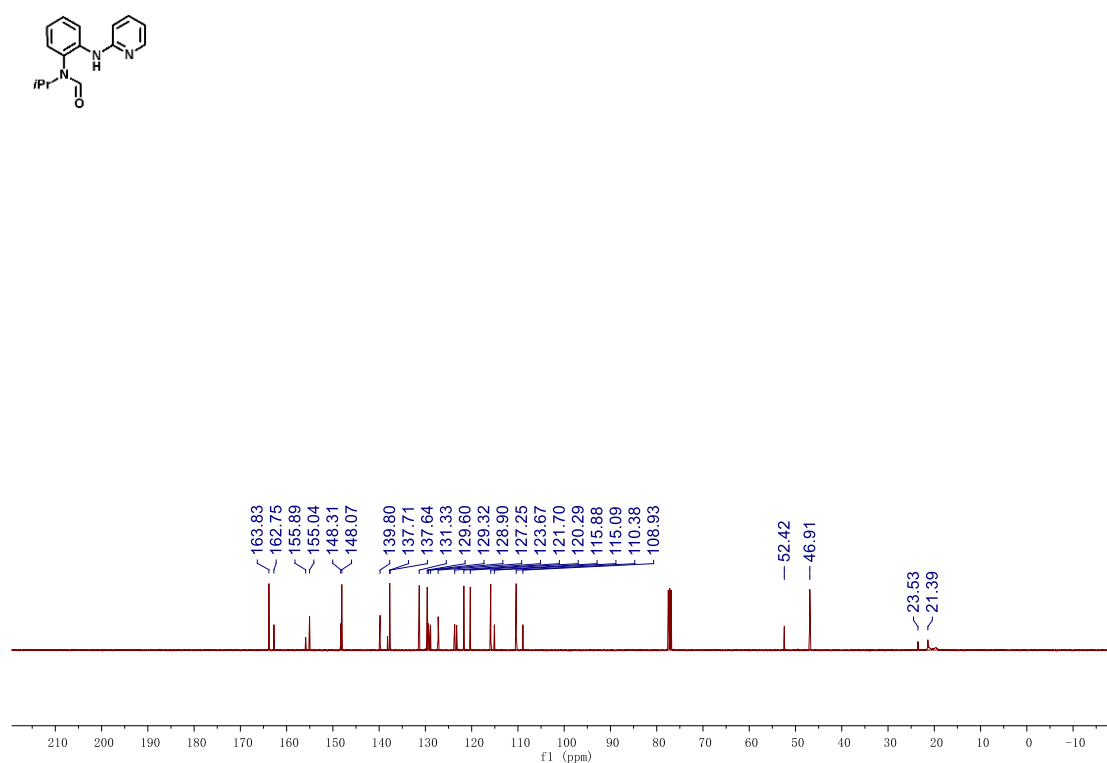

**Figure S8.** <sup>13</sup>C NMR (100 MHz, CDCl<sub>3</sub>) spectrum of compound C8.

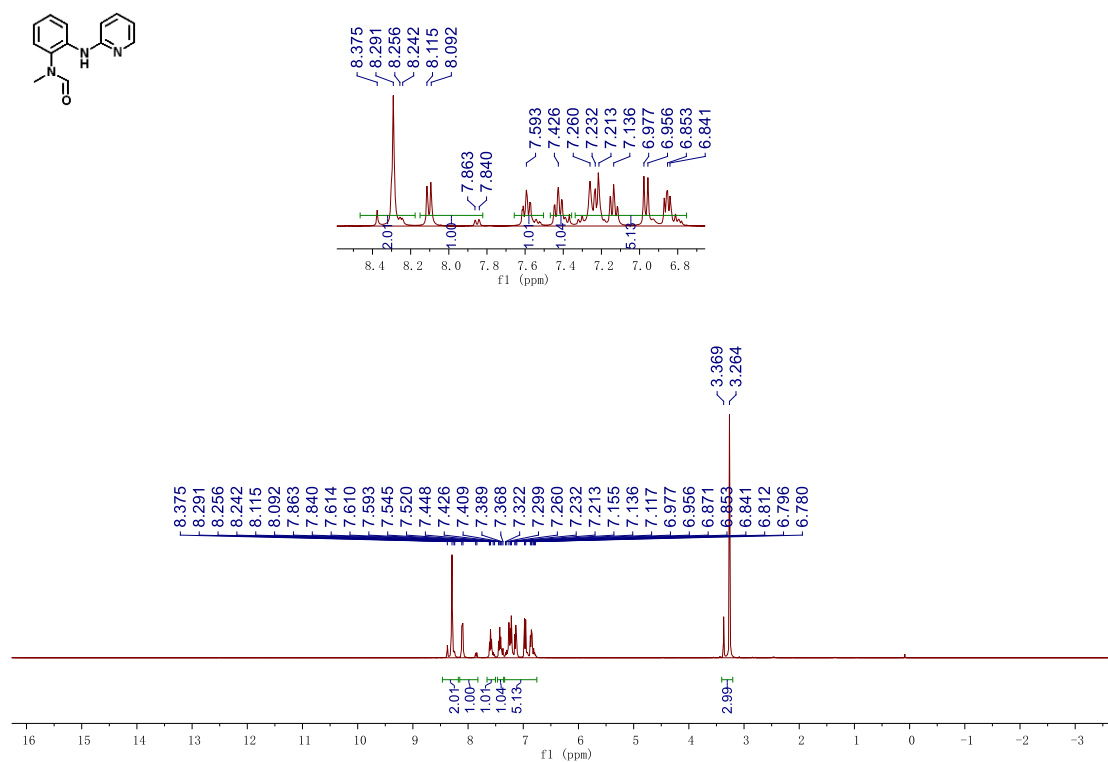

**Figure S9.** <sup>1</sup>H NMR (400 MHz, CDCl<sub>3</sub>) spectrum of compound **C9**.

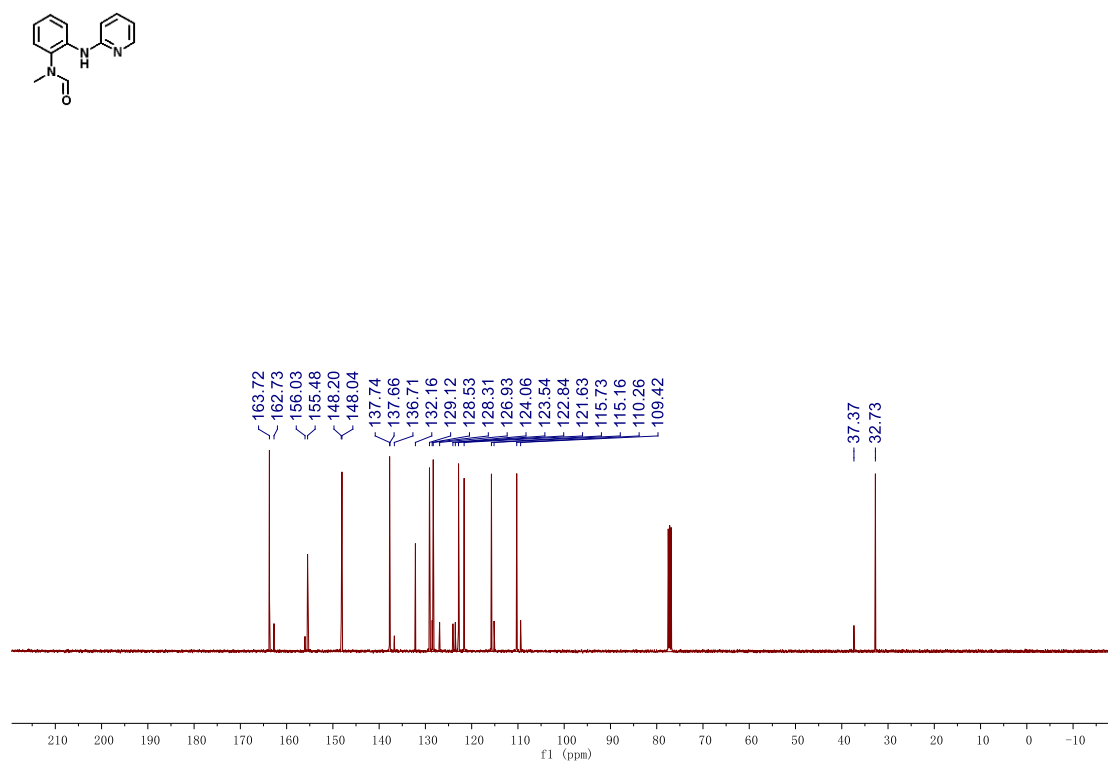

**Figure S10.** <sup>13</sup>C NMR (100 MHz, CDCl<sub>3</sub>) spectrum of compound **C9**.

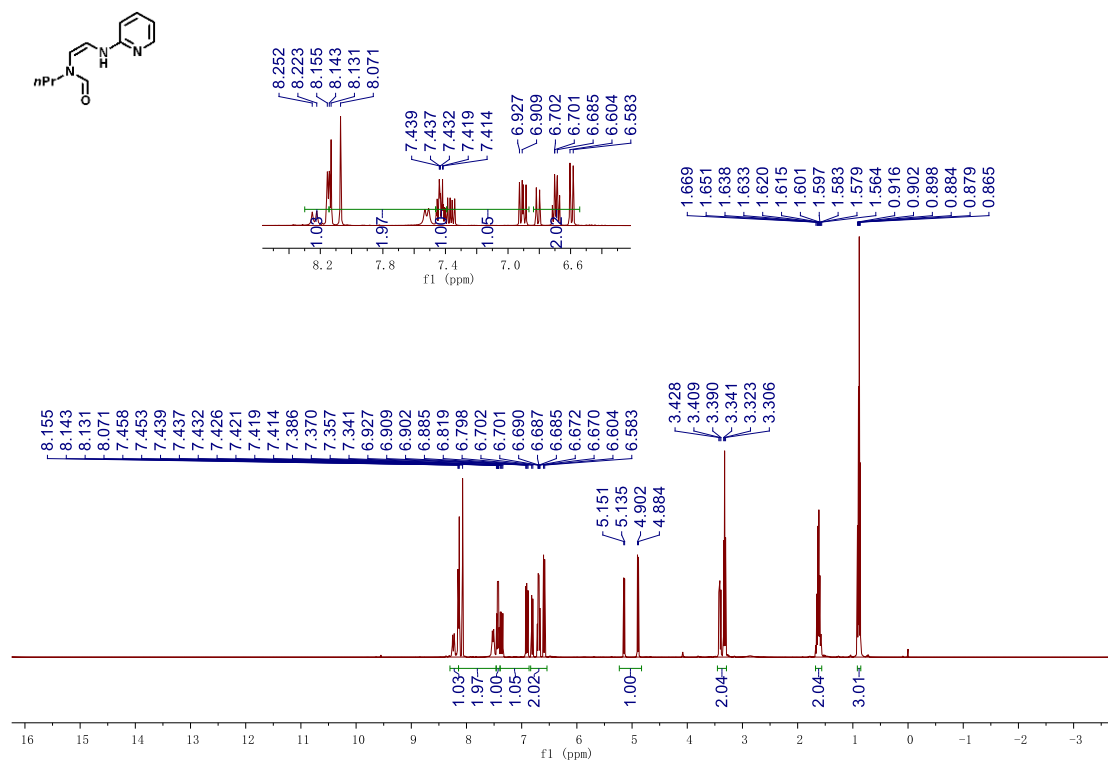

**Figure S11.** <sup>1</sup>H NMR (400 MHz, CDCl<sub>3</sub>) spectrum of compound C10.

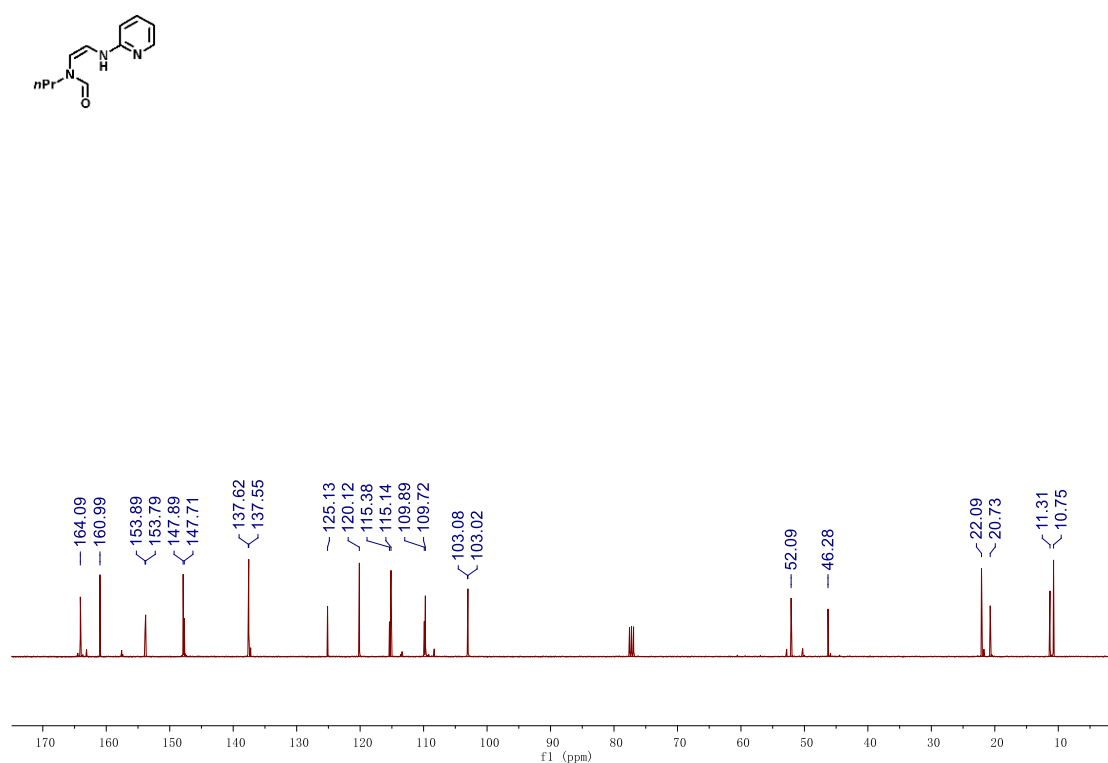

**Figure S12.** <sup>13</sup>C NMR (100 MHz, CDCl<sub>3</sub>) spectrum of compound C10.

Chemical structure of compound **1** is shown in the top left corner. The structure is a bis(oxazoline) derivative with a central boron atom bonded to two phenyl groups and two oxazoline rings. The oxazoline rings are substituted with a tert-butyl group and a phenyl group.

<sup>1</sup>H NMR spectrum (400 MHz, CDCl<sub>3</sub>) is shown in the top right. The x-axis is labeled 'f1 (ppm)' and ranges from 8.0 to 5.0. The spectrum shows several multiplets and doublets, with peak labels: 8.136, 8.123, 7.612, 7.594, 7.573, 7.158, 7.139, 7.117, 6.913, 6.826, 6.534, 6.513, 6.496, 6.328, and 6.307. Integration values are provided below the peaks: 1.00, 1.00, 2.05, 0.88, 1.02, 0.96, 1.00, and 1.00.

<sup>13</sup>C NMR spectrum (100 MHz, CDCl<sub>3</sub>) is shown in the bottom right. The x-axis is labeled 'f1 (ppm)' and ranges from 16 to -3. The spectrum shows a large peak at 1.702 ppm and several smaller peaks at 1.683, 1.684, 1.650, 1.644, 1.624, 1.228, 1.217, 0.921, 0.902, and 0.884. Integration values are provided below the peaks: 1.00, 1.00, 2.05, 0.88, 1.02, 0.96, 1.00, 2.00, 1.96, 24.04, and 3.09.

Chemical structure of compound 10 is shown in the top left corner. The  $^1\text{H}$  NMR spectrum (CDCl<sub>3</sub>) is displayed below, with peaks labeled by their chemical shifts (ppm):

- 159.86
- 149.44
- 141.66
- 139.47
- 135.58
- 126.07
- 117.37
- 115.24
- 114.47
- 110.09
- 105.33
- 81.72
- 48.75
- 26.06
- 25.83
- 24.58
- 22.30
- 11.55

**Figure S14.**  $^{13}\text{C}$  NMR (100 MHz,  $\text{CDCl}_3$ ) spectrum of compound **M**.

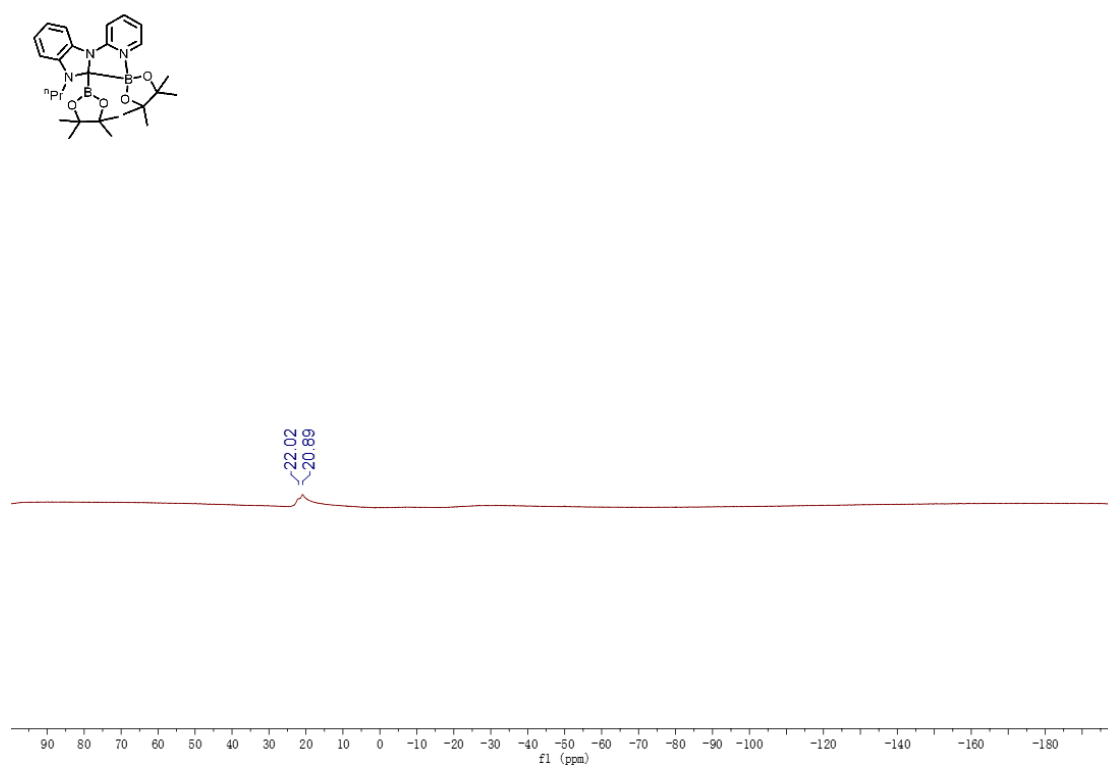

**Figure S15.**  $^{11}\text{B}$  NMR (128 MHz,  $\text{CDCl}_3$ ) spectrum of compound **M**.

## 11. NMR Spectra for Hydroborated Products

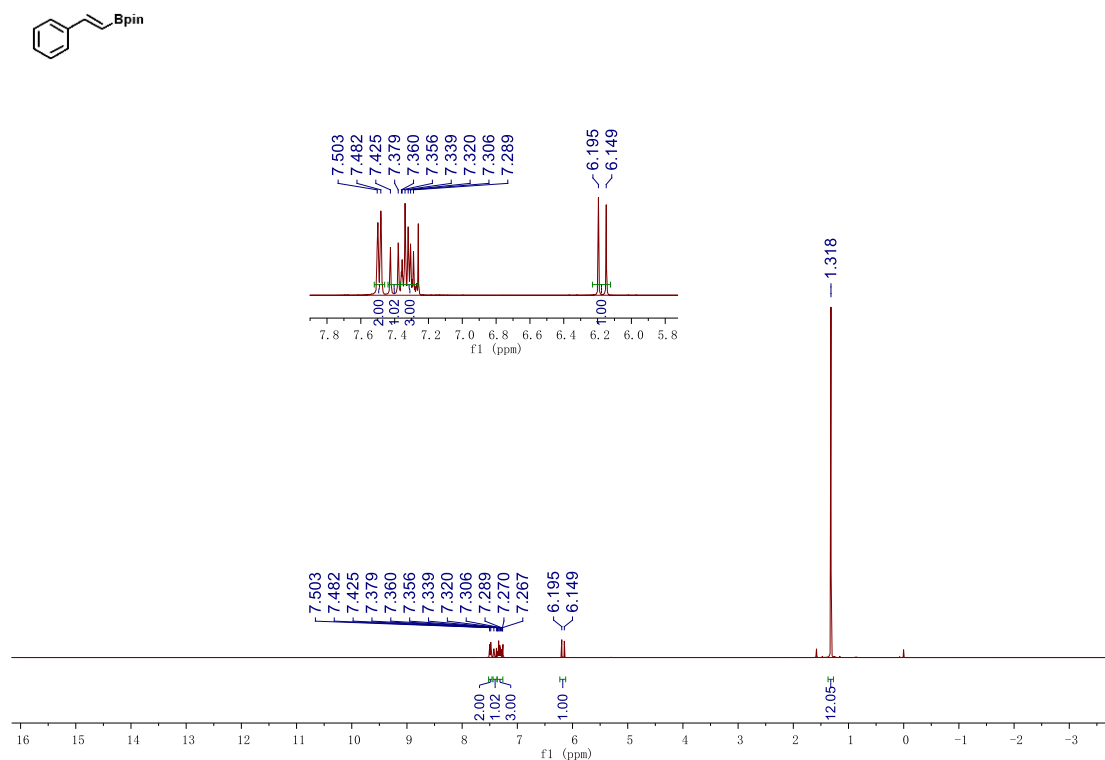

**Figure S16.** <sup>1</sup>H NMR (400 MHz, CDCl<sub>3</sub>) spectrum of compound **2a**.

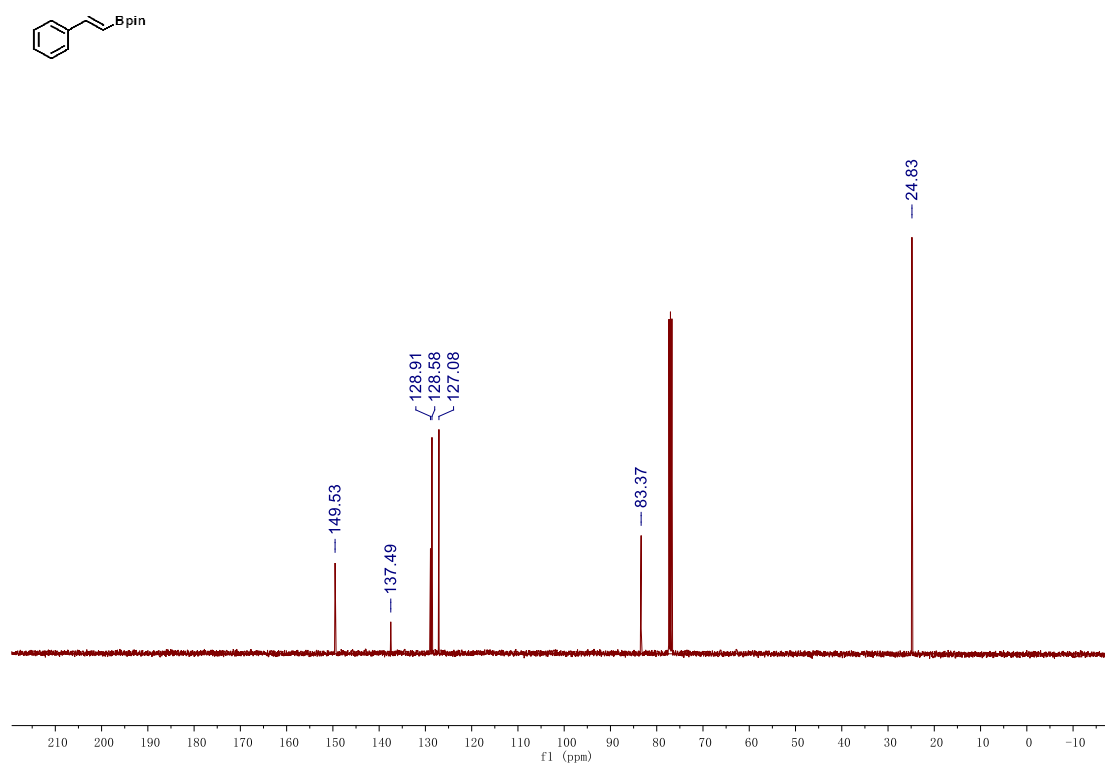

**Figure S17.** <sup>13</sup>C NMR (100 MHz, CDCl<sub>3</sub>) spectrum of compound **2a**.

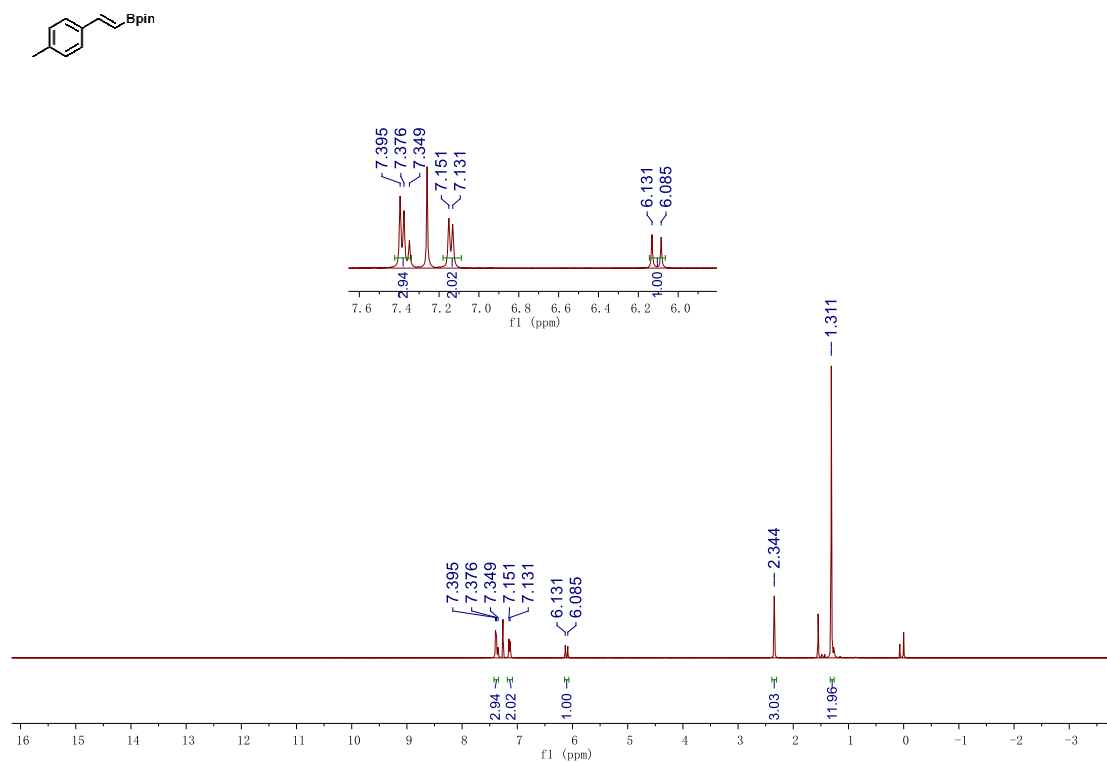

**Figure S18.** <sup>1</sup>H NMR (400 MHz, CDCl<sub>3</sub>) spectrum of compound **2b**.

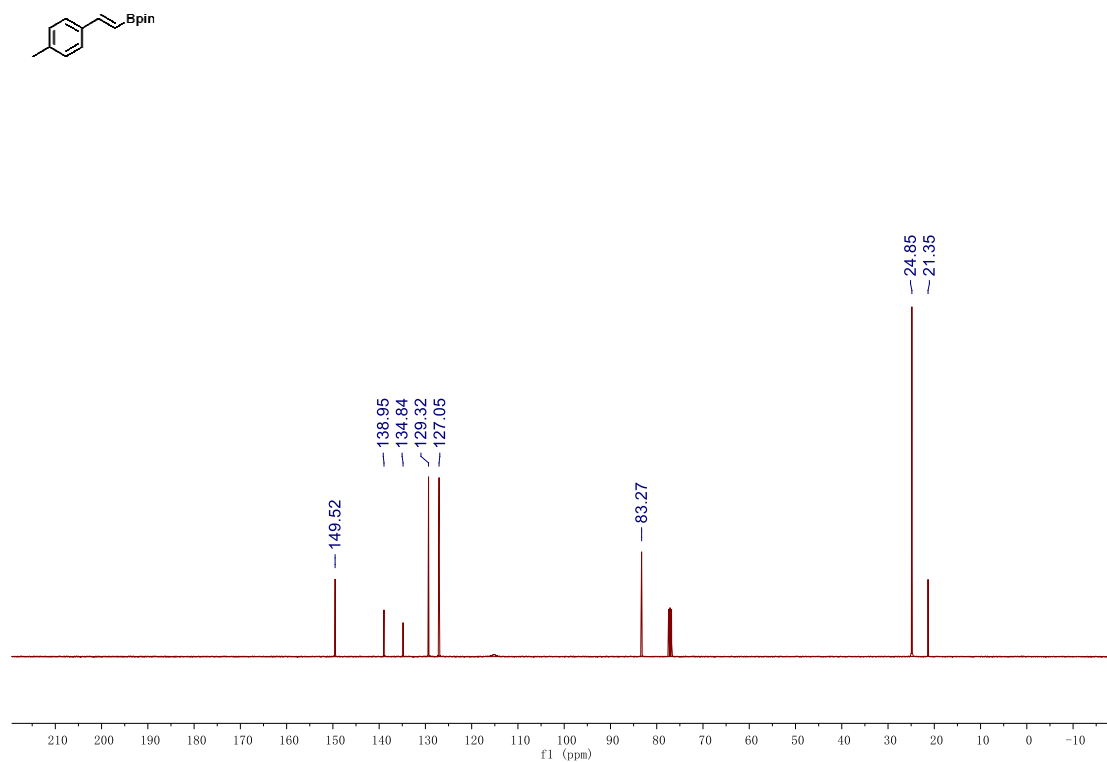

**Figure S19.** <sup>13</sup>C NMR (100 MHz, CDCl<sub>3</sub>) spectrum of compound **2b**.



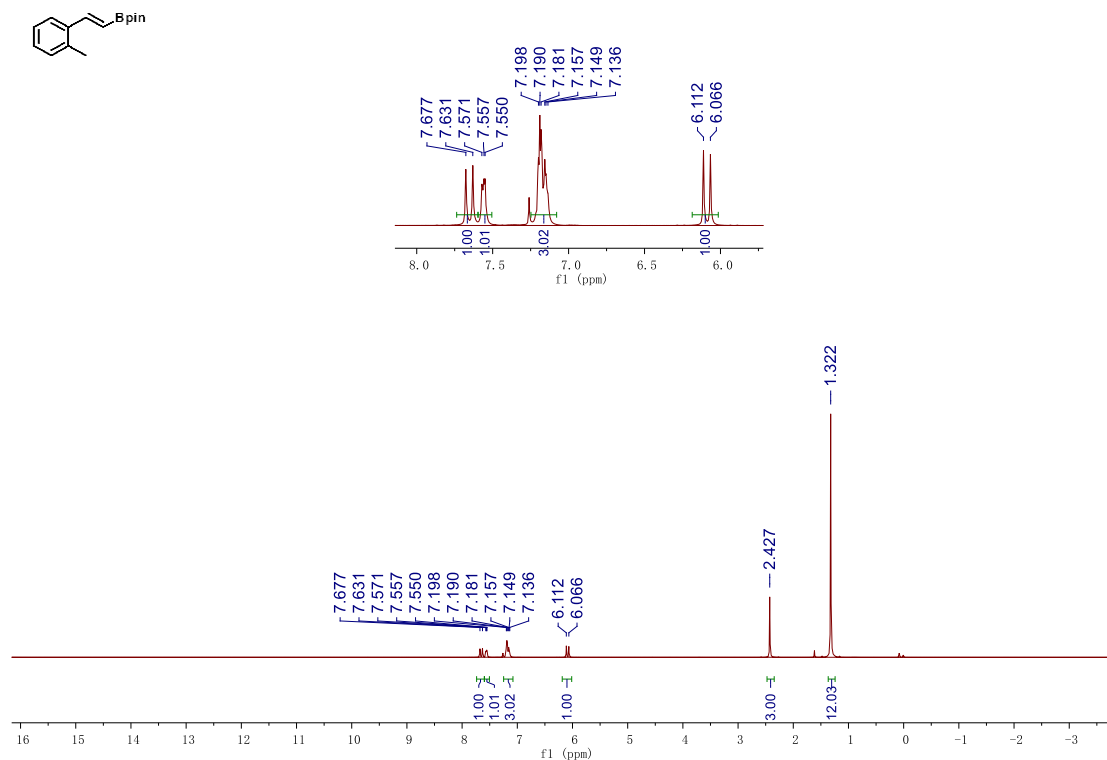

**Figure S22.** <sup>1</sup>H NMR (400 MHz, CDCl<sub>3</sub>) spectrum of compound **2d**.

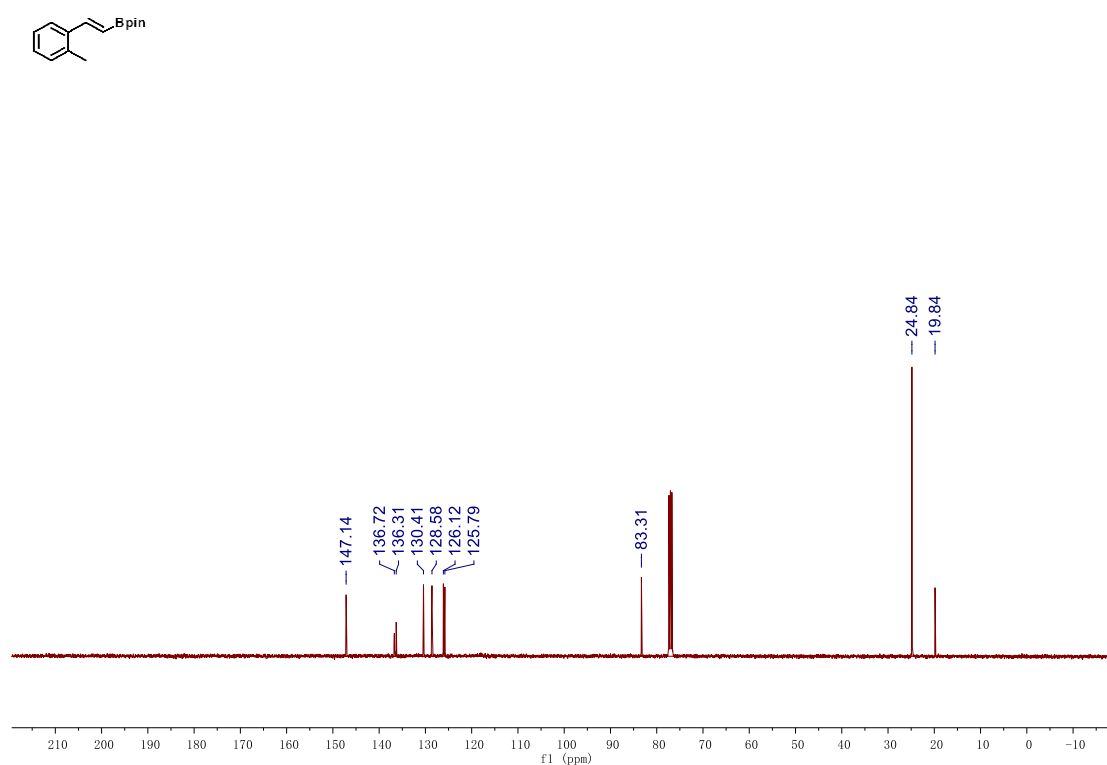

**Figure S23.** <sup>13</sup>C NMR (100 MHz, CDCl<sub>3</sub>) spectrum of compound **2d**.

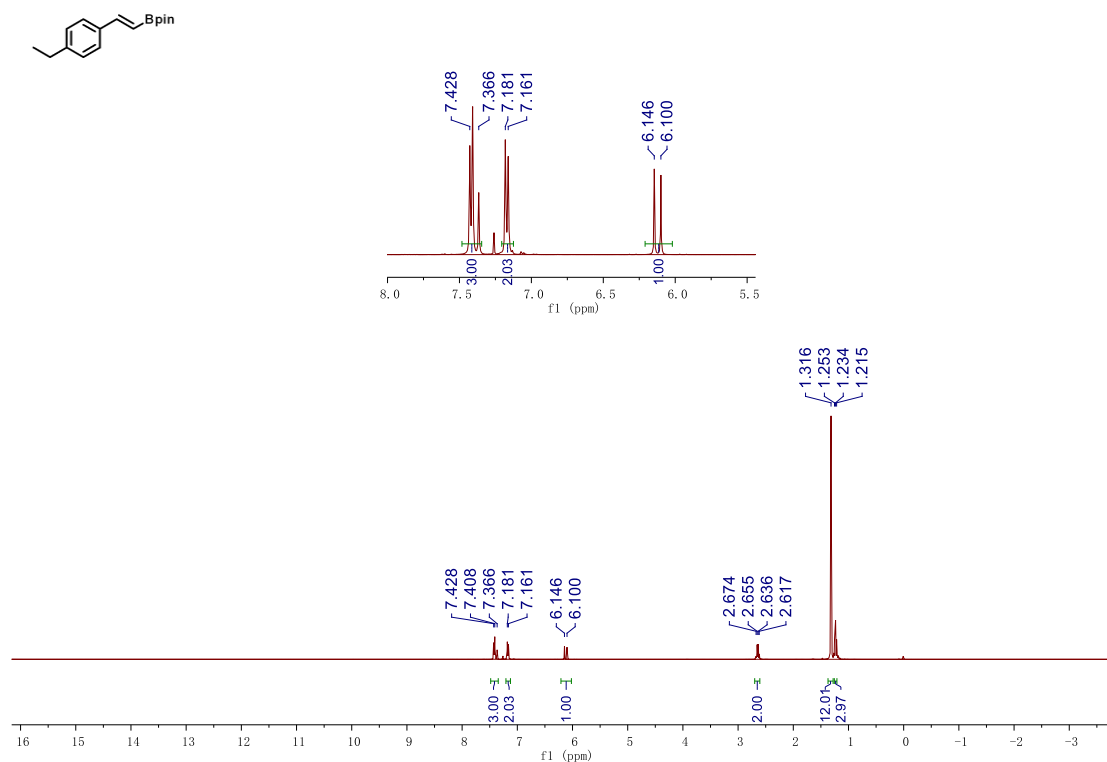

**Figure S24.** <sup>1</sup>H NMR (400 MHz, CDCl<sub>3</sub>) spectrum of compound **2e**.

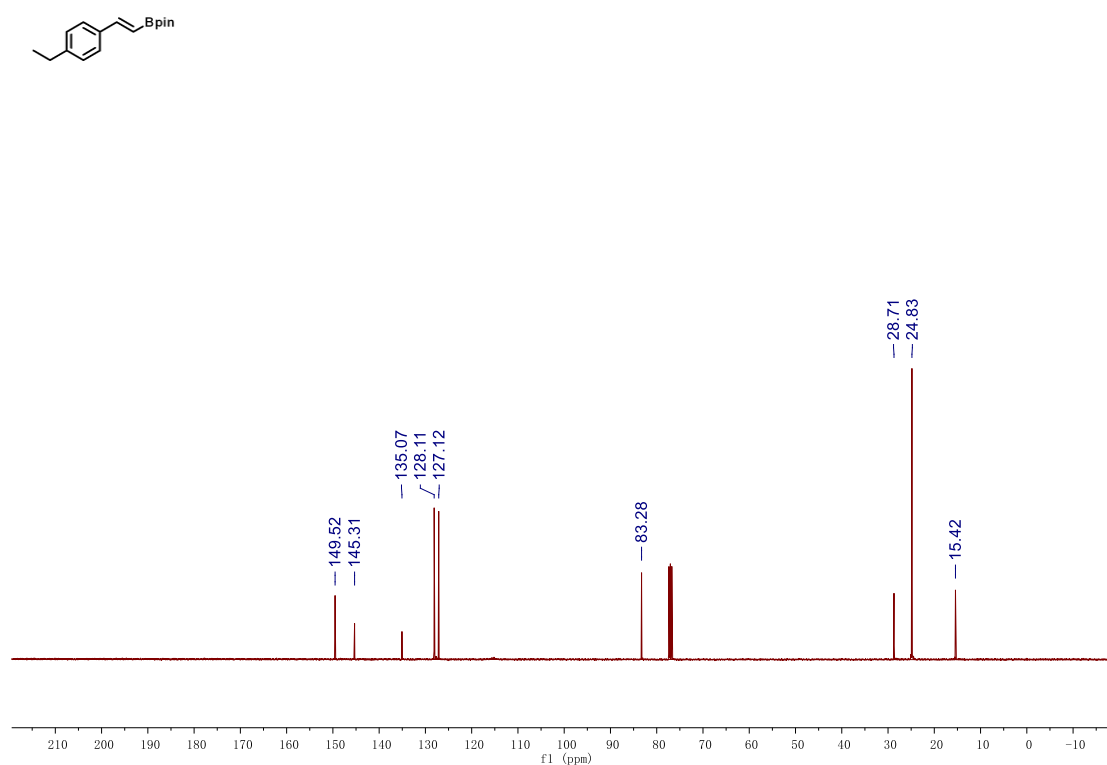

**Figure S25.** <sup>13</sup>C NMR (100 MHz, CDCl<sub>3</sub>) spectrum of compound **2e**.



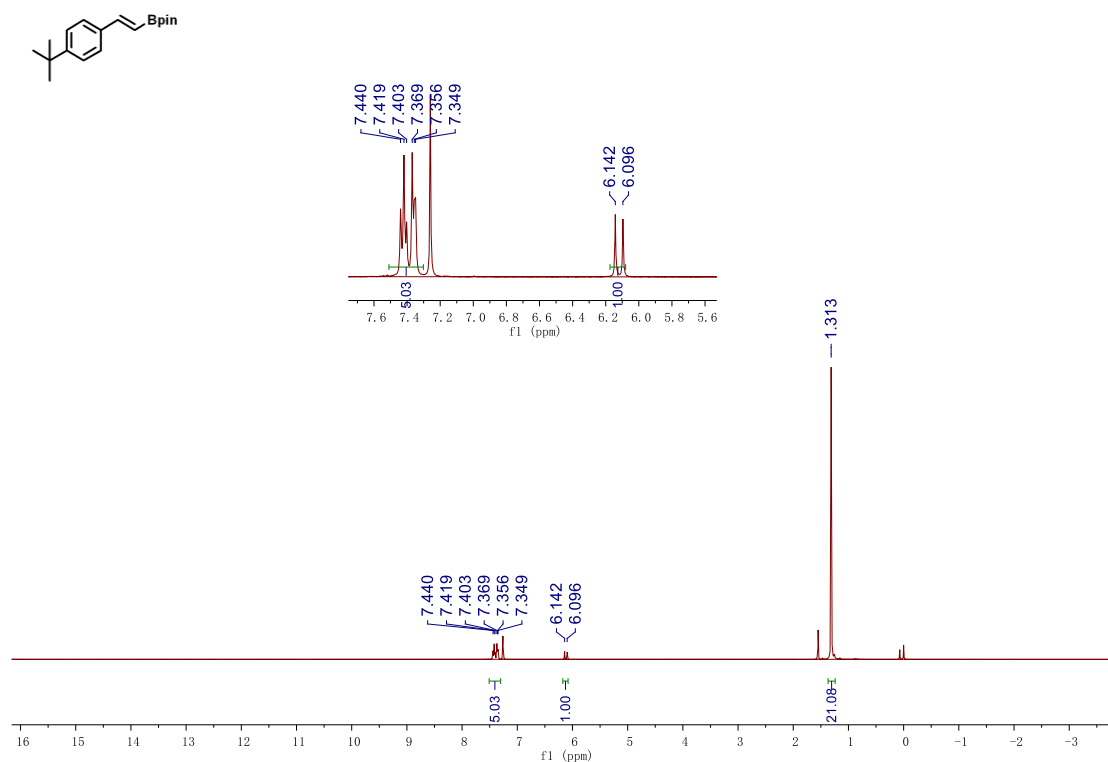

**Figure S28.** <sup>1</sup>H NMR (400 MHz, CDCl<sub>3</sub>) spectrum of compound **2g**.

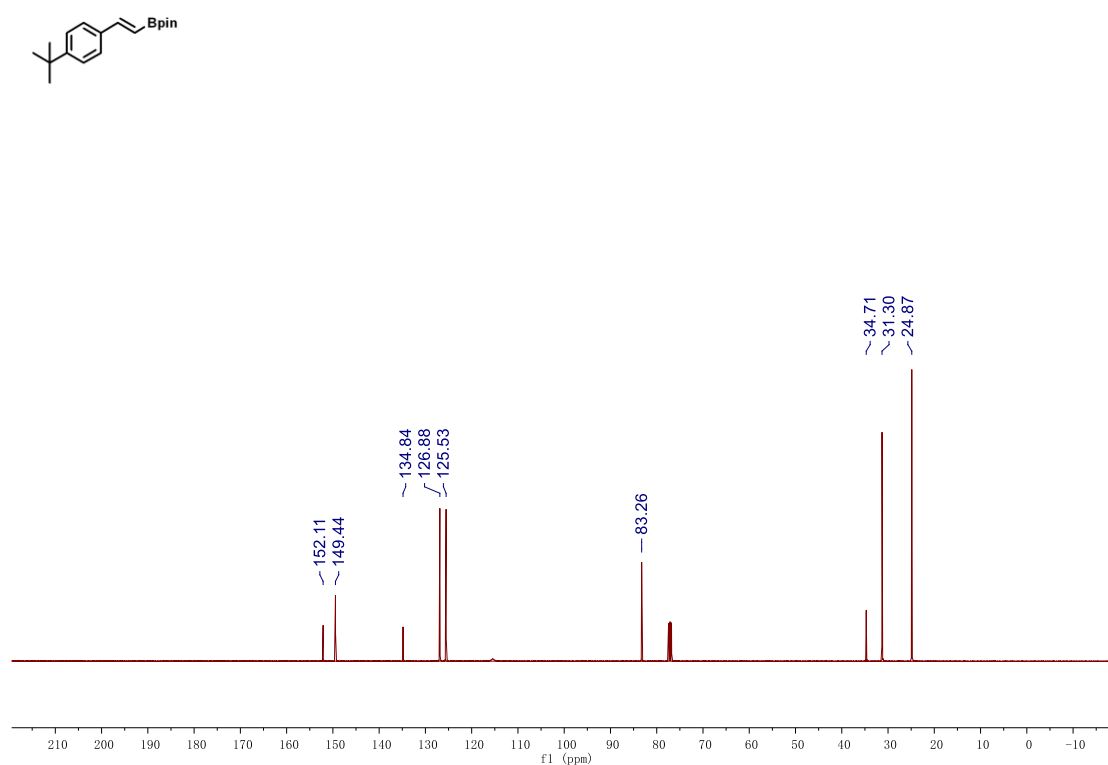

**Figure S29.** <sup>13</sup>C NMR (100 MHz, CDCl<sub>3</sub>) spectrum of compound **2g**.

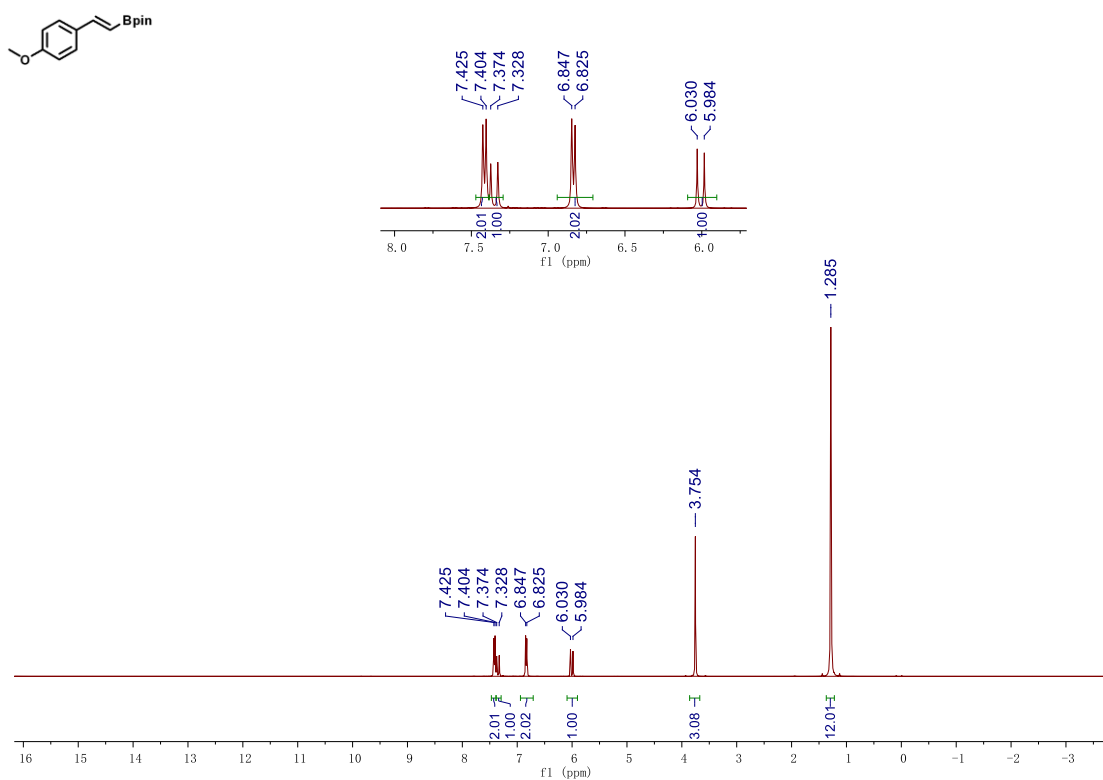

**Figure S30.** <sup>1</sup>H NMR (400 MHz, CDCl<sub>3</sub>) spectrum of compound **2h**.

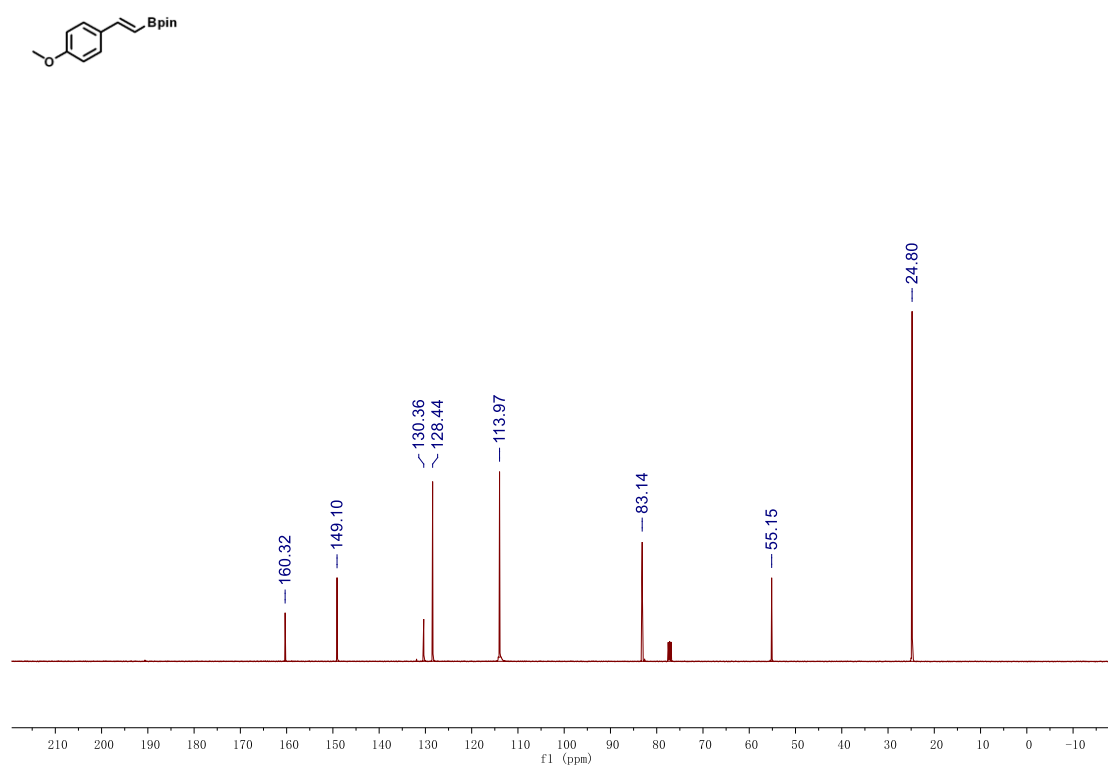

**Figure S31.** <sup>13</sup>C NMR (100 MHz, CDCl<sub>3</sub>) spectrum of compound **2h**.

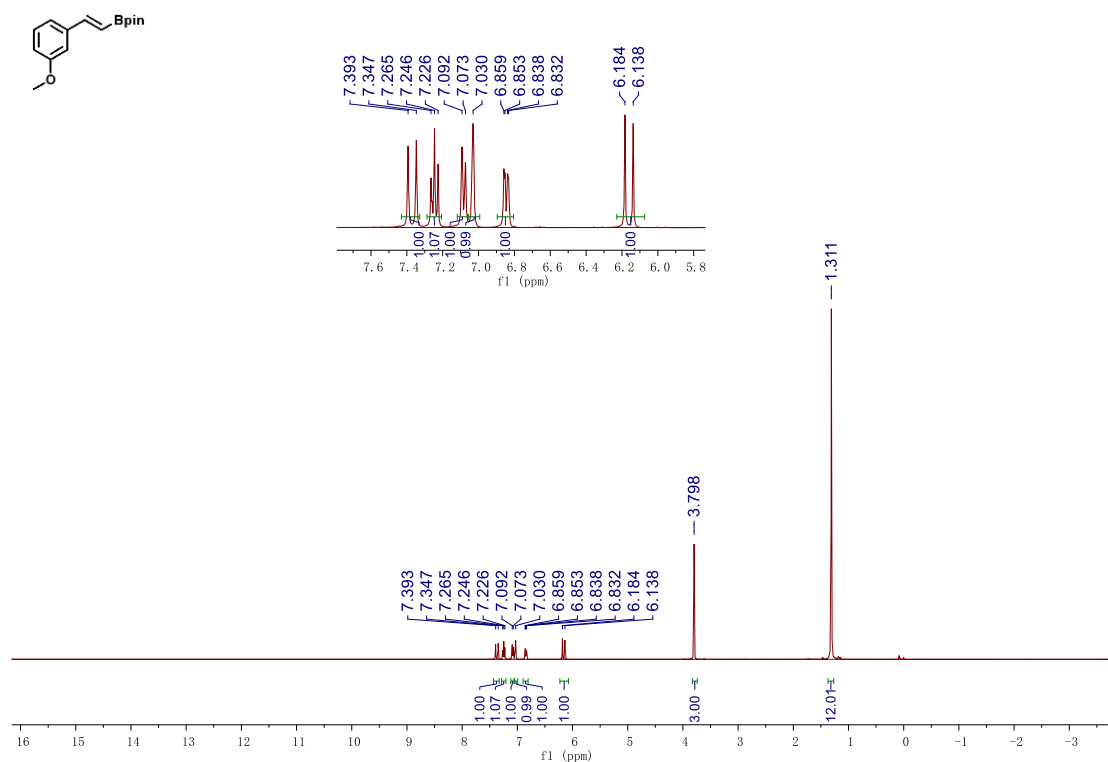

**Figure S32.** <sup>1</sup>H NMR (400 MHz, CDCl<sub>3</sub>) spectrum of compound **2i**.

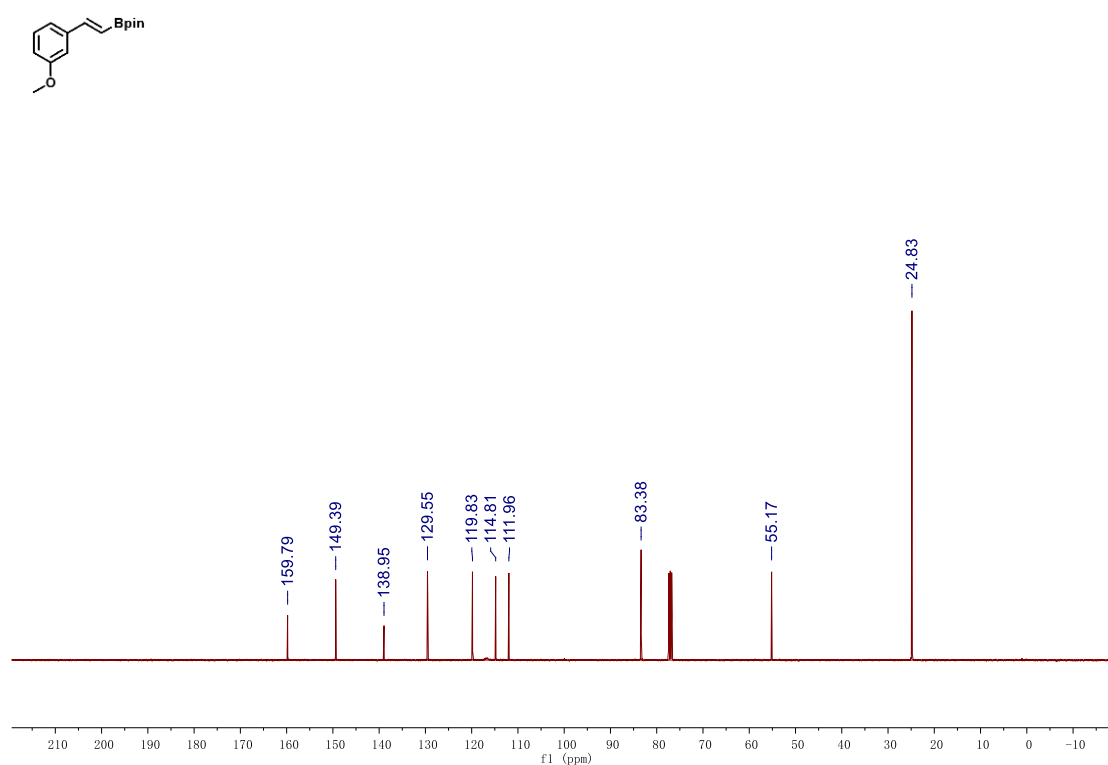

**Figure S33.** <sup>13</sup>C NMR (100 MHz, CDCl<sub>3</sub>) spectrum of compound **2i**.

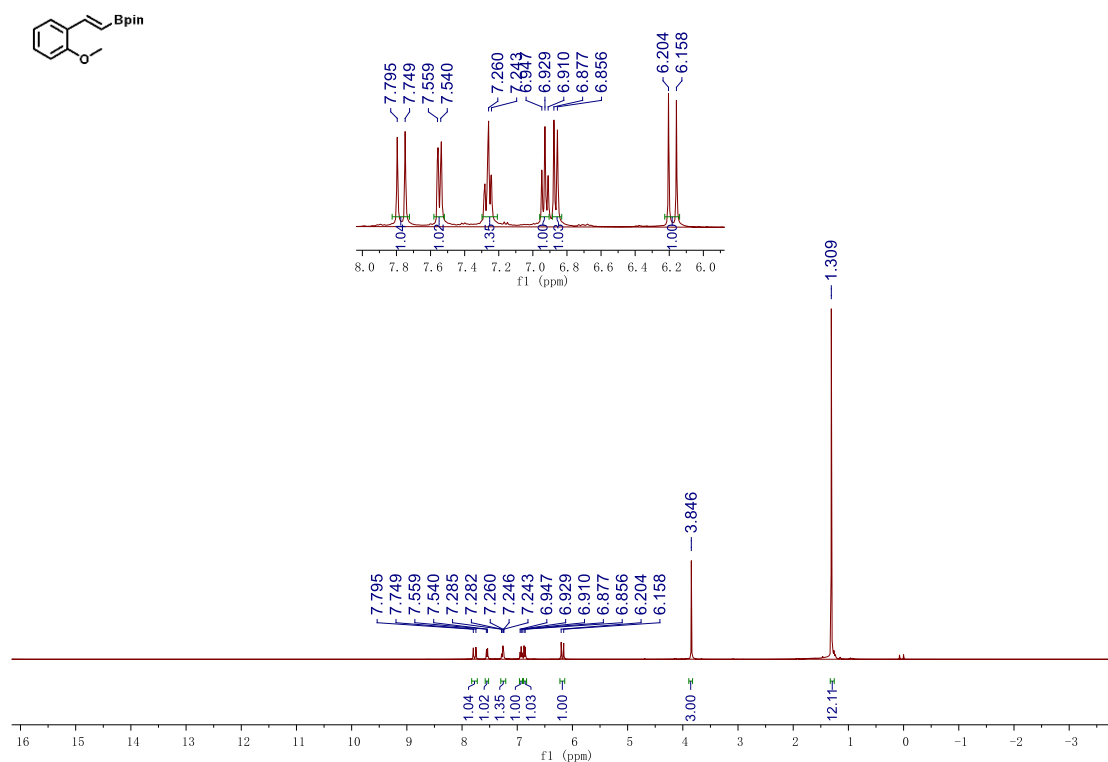

**Figure S34.**  $^1\text{H}$  NMR (400 MHz,  $\text{CDCl}_3$ ) spectrum of compound **2j**.

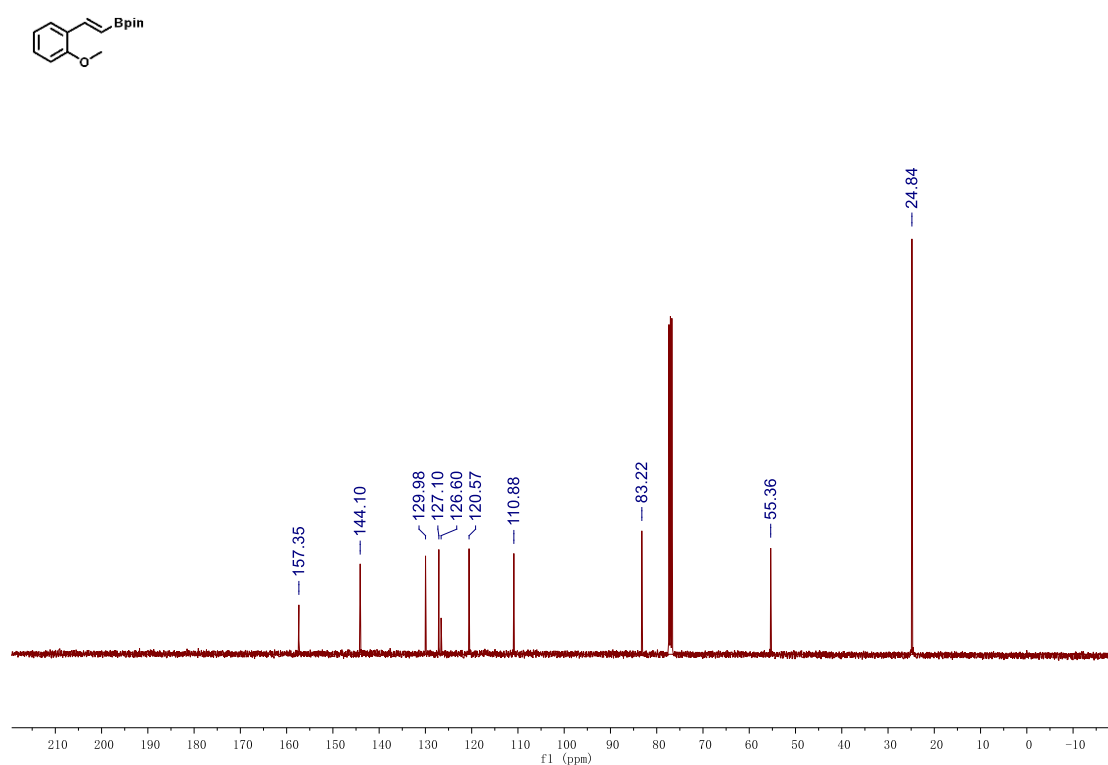

**Figure S35.**  $^{13}\text{C}$  NMR (100 MHz,  $\text{CDCl}_3$ ) spectrum of compound **2j**.

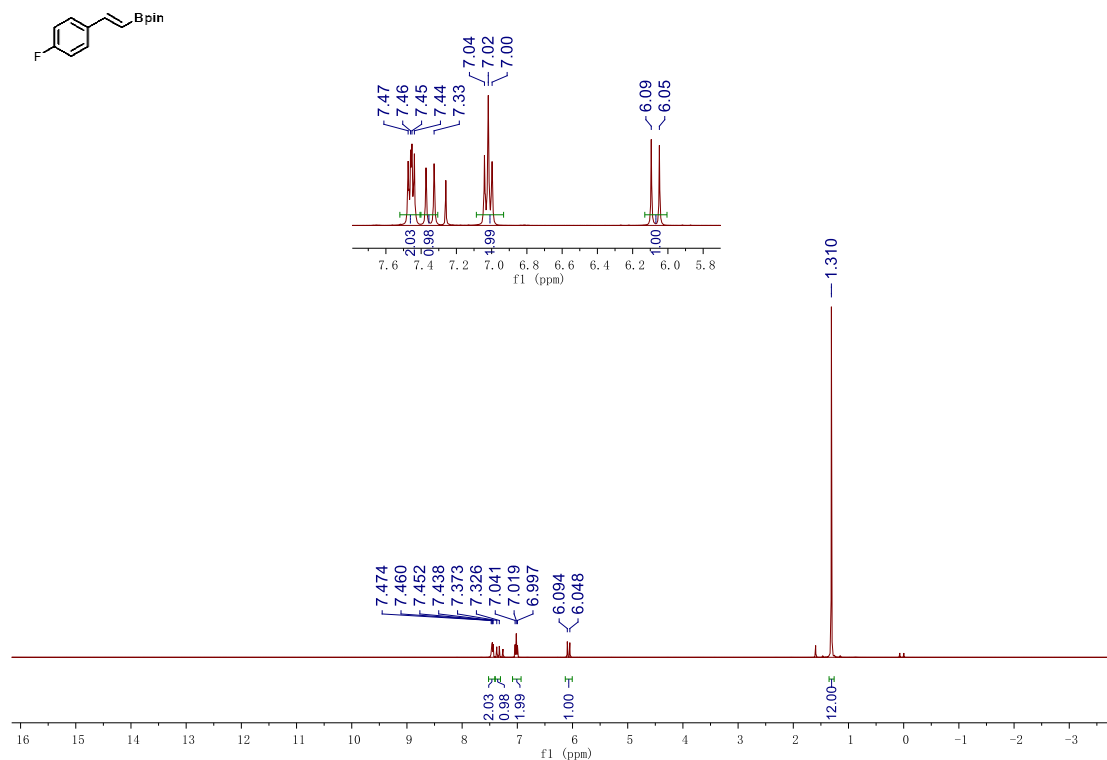

**Figure S36.** <sup>1</sup>H NMR (400 MHz, CDCl<sub>3</sub>) spectrum of compound **2k**.

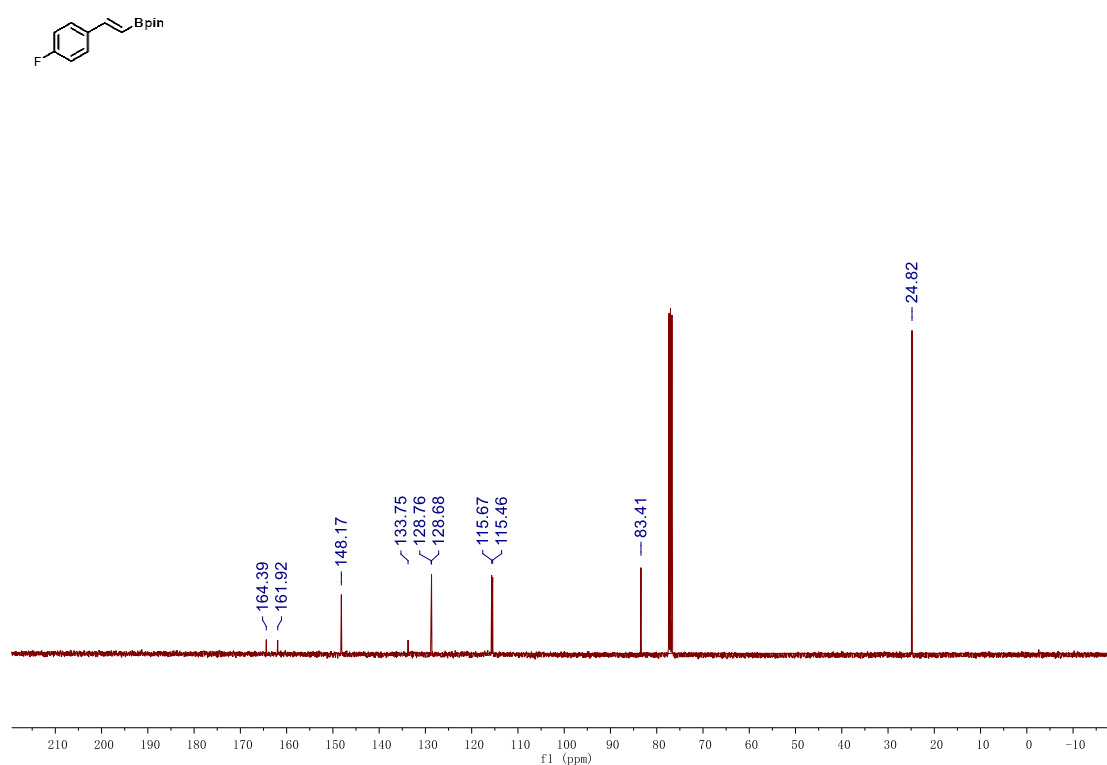

**Figure S37.** <sup>13</sup>C NMR (100 MHz, CDCl<sub>3</sub>) spectrum of compound **2k**.

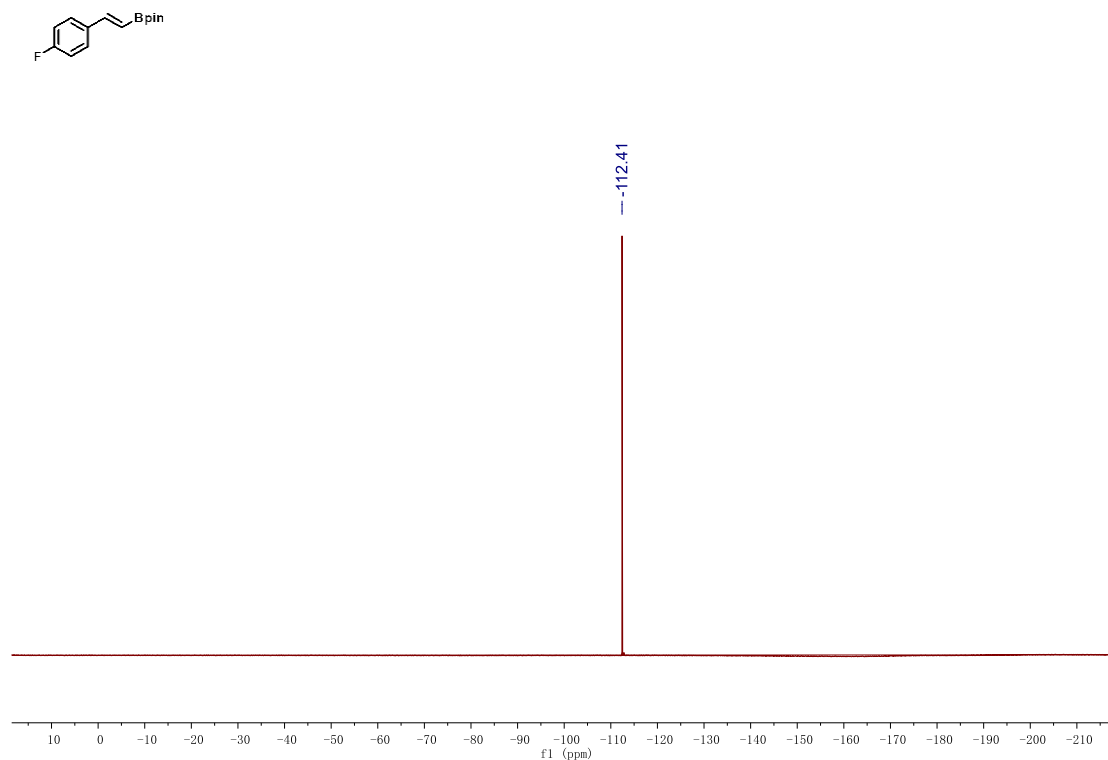

**Figure S38.**  $^{19}\text{F}$  NMR (376 MHz,  $\text{CDCl}_3$ ) spectrum of compound **2k**.

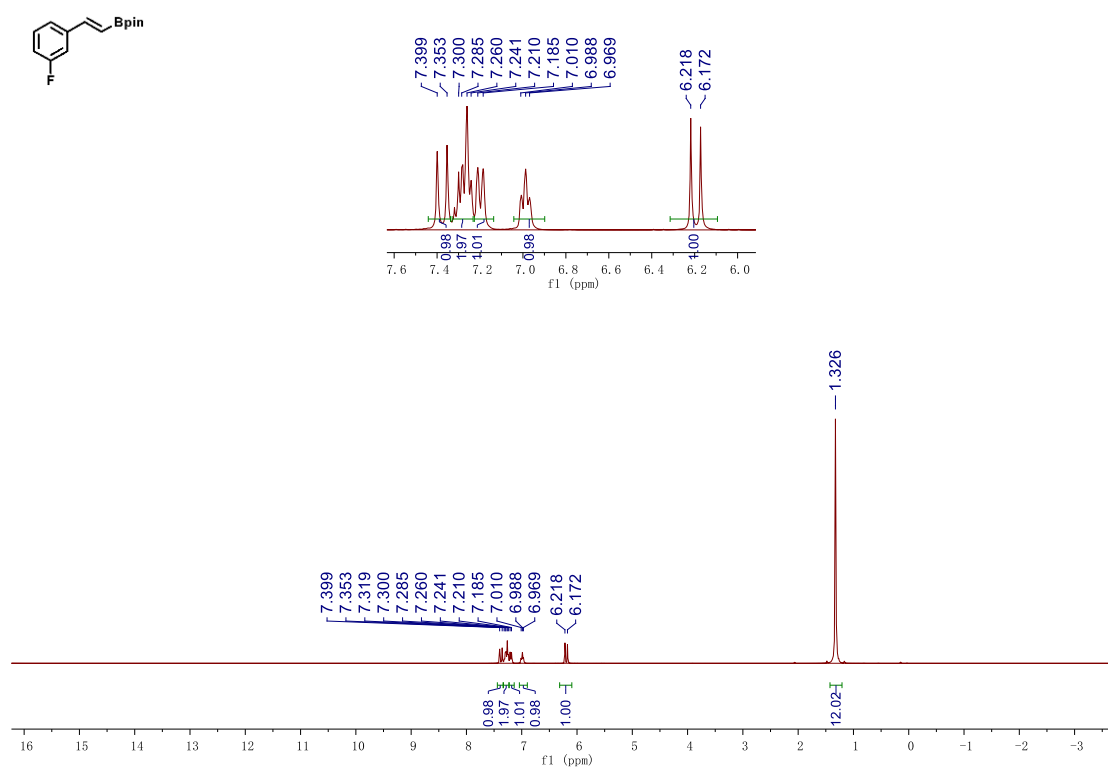

**Figure S39.**  $^1\text{H}$  NMR (400 MHz,  $\text{CDCl}_3$ ) spectrum of compound **2l**.

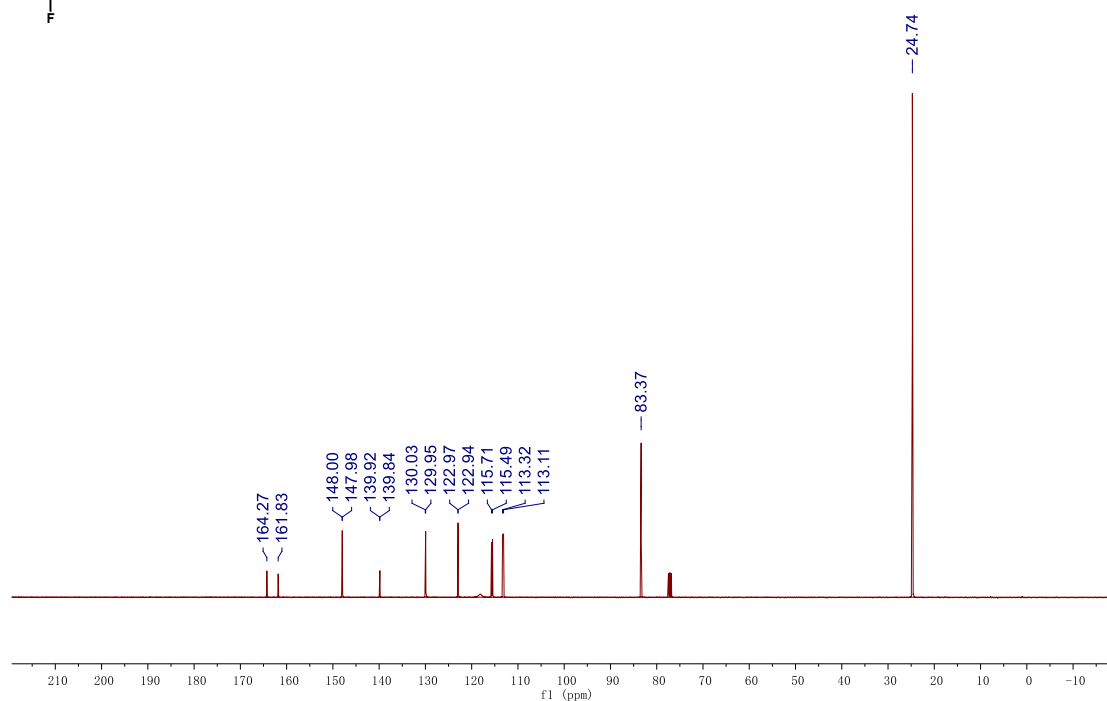

**Figure S40.**  $^{13}\text{C}$  NMR (100 MHz,  $\text{CDCl}_3$ ) spectrum of compound **2l**.

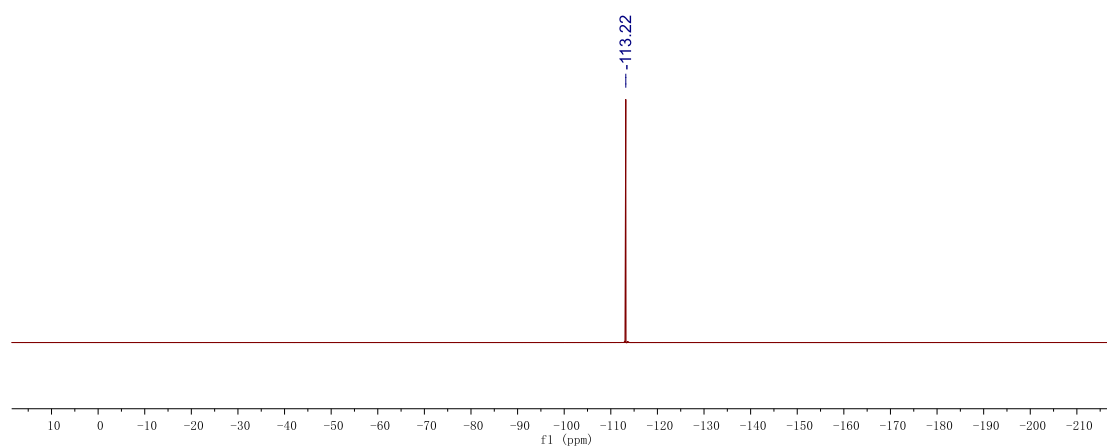

**Figure S41.**  $^{19}\text{F}$  NMR (376 MHz,  $\text{CDCl}_3$ ) spectrum of compound **2l**.

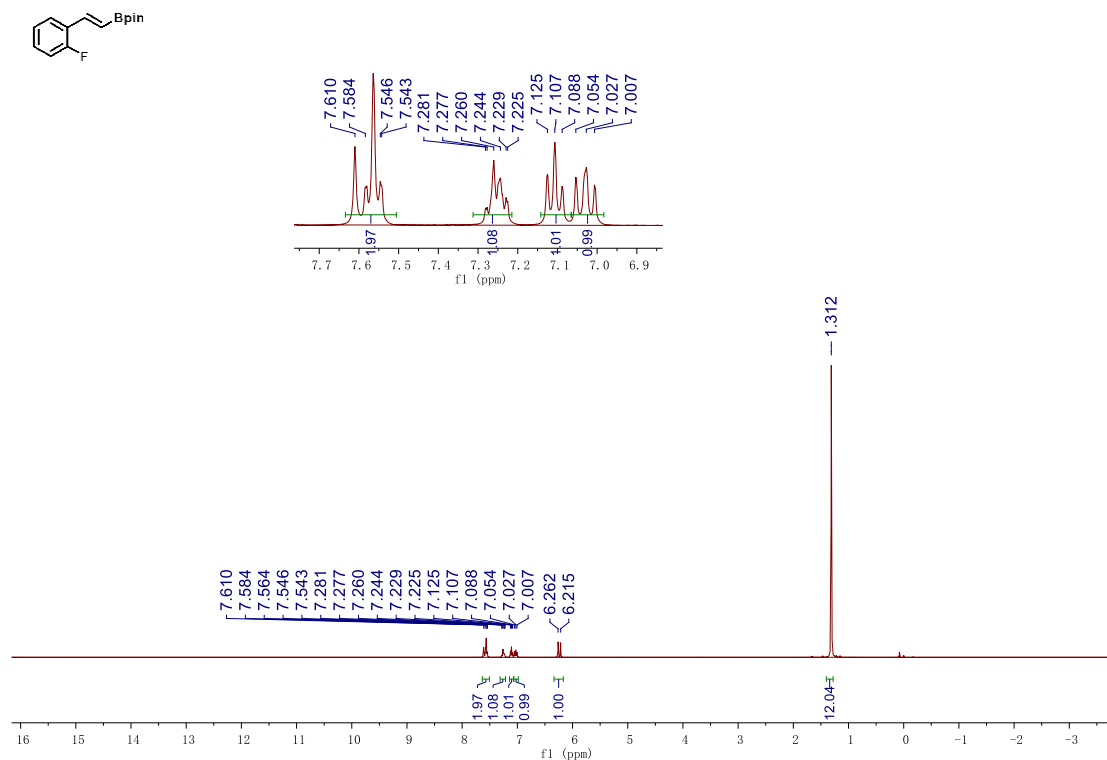

**Figure S42.** <sup>1</sup>H NMR (400 MHz, CDCl<sub>3</sub>) spectrum of compound **2m**.

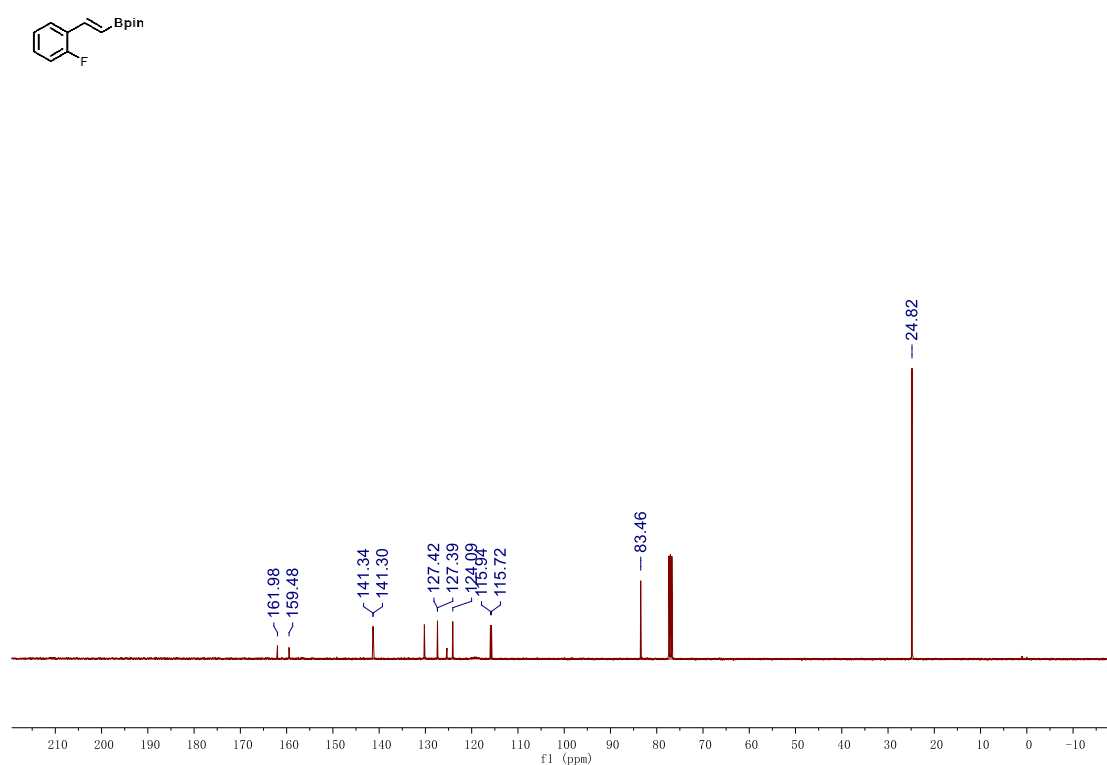

**Figure S43.** <sup>13</sup>C NMR (100 MHz, CDCl<sub>3</sub>) spectrum of compound **2m**.

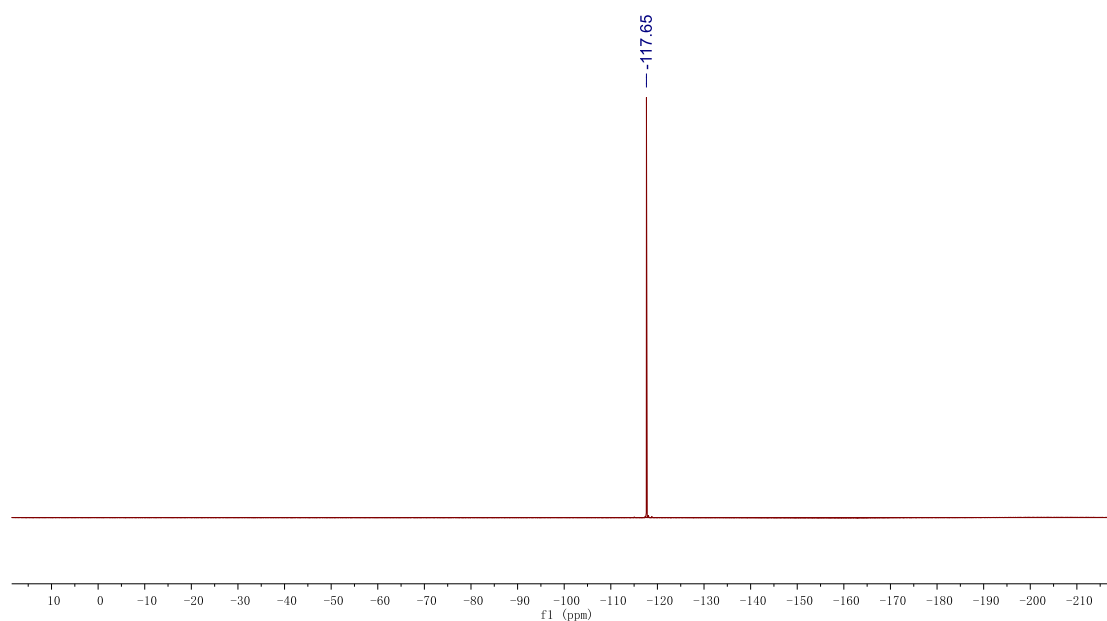Clc1ccc(cc1)/C=C/Bpin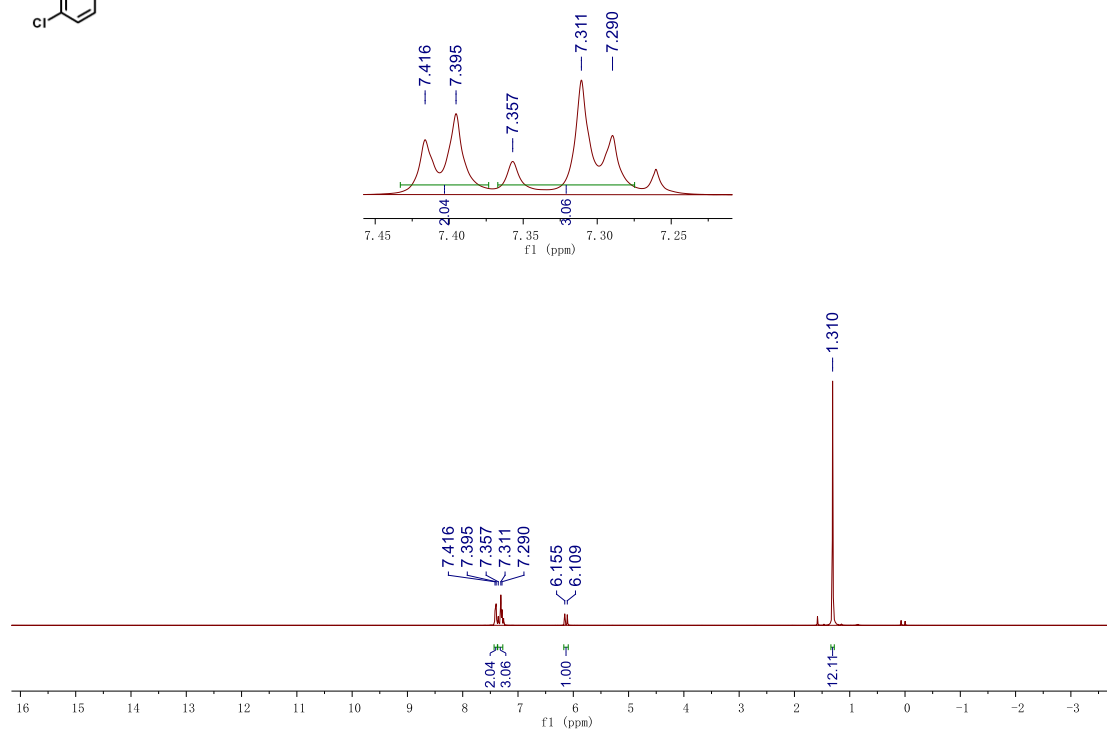

S46

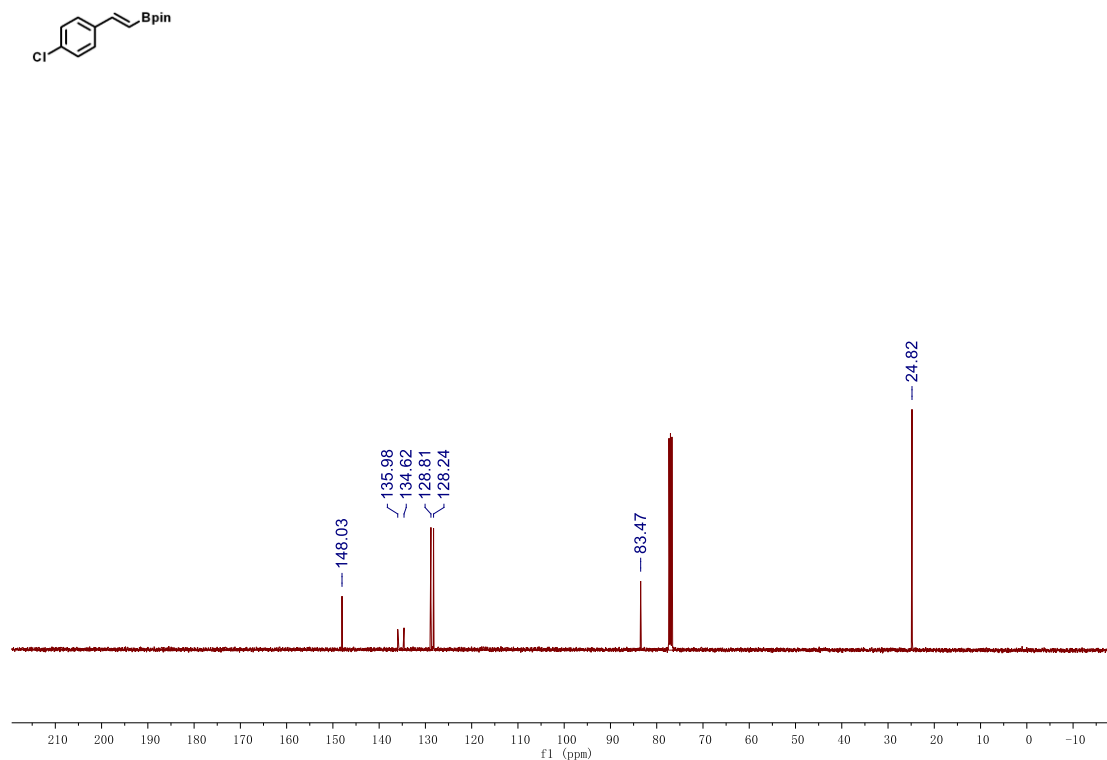

**Figure S46.**  $^{13}\text{C}$  NMR (100 MHz,  $\text{CDCl}_3$ ) spectrum of compound **2n**.

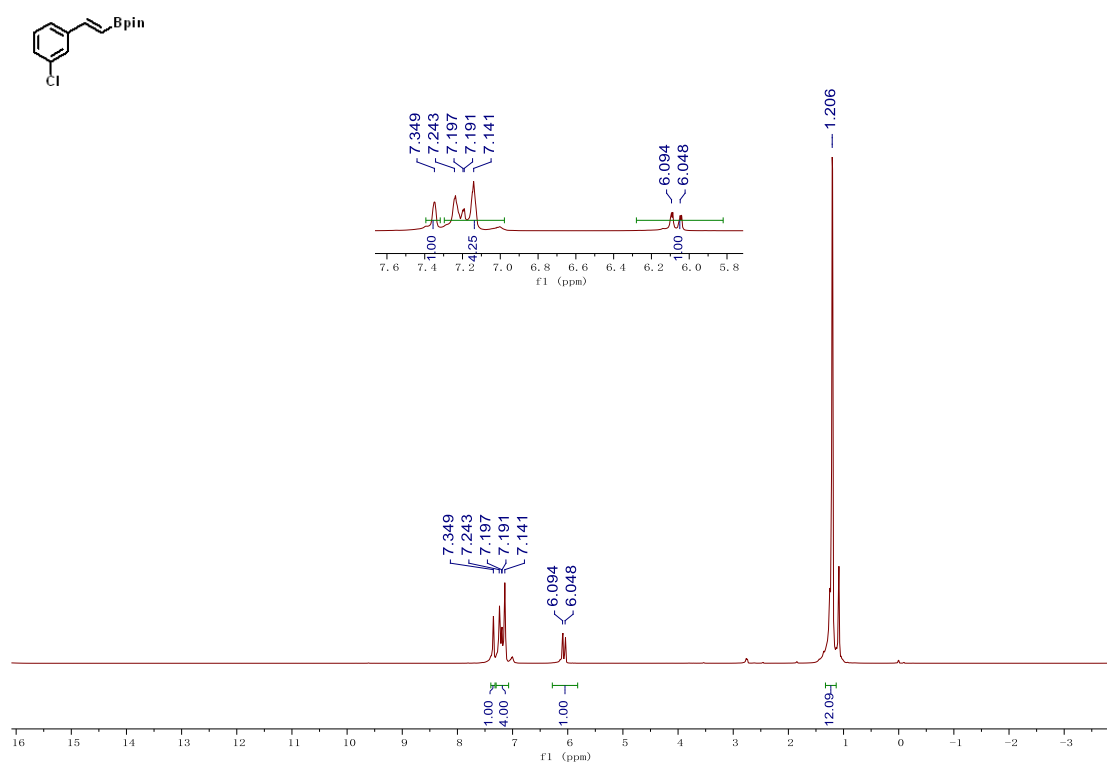

**Figure S47.**  $^1\text{H}$  NMR (400 MHz,  $\text{CDCl}_3$ ) spectrum of compound **2o**.

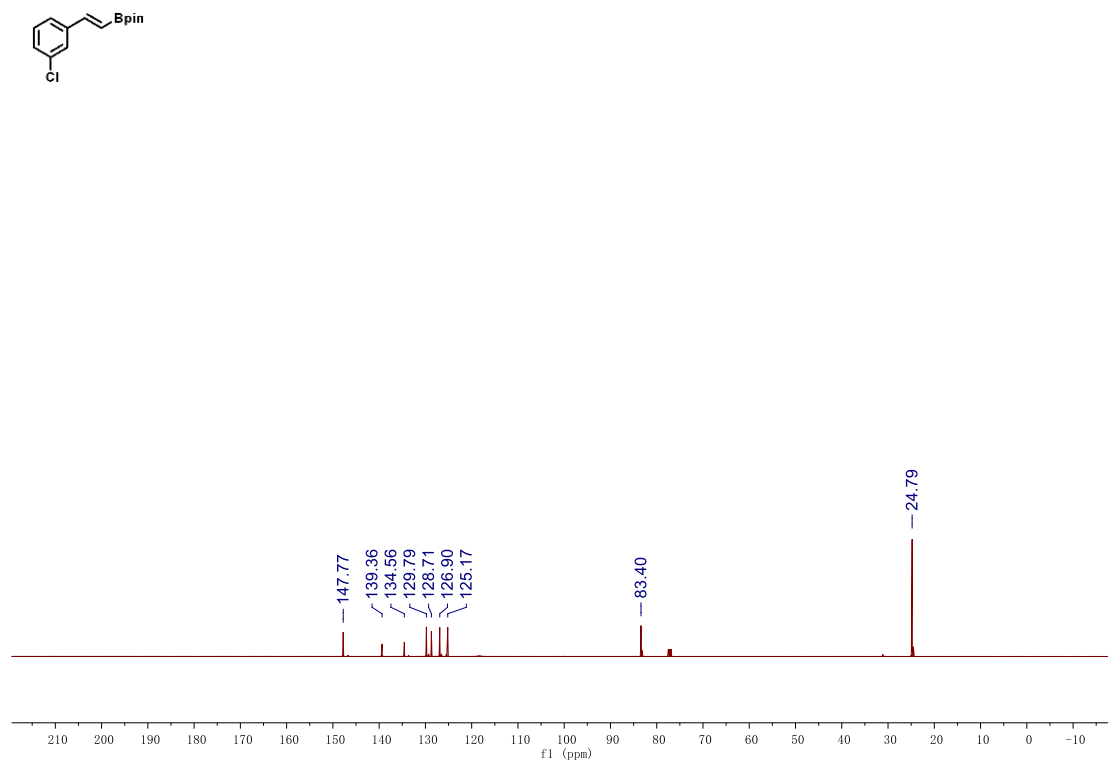

**Figure S48.** <sup>13</sup>C NMR (100 MHz, CDCl<sub>3</sub>) spectrum of compound **2o**.

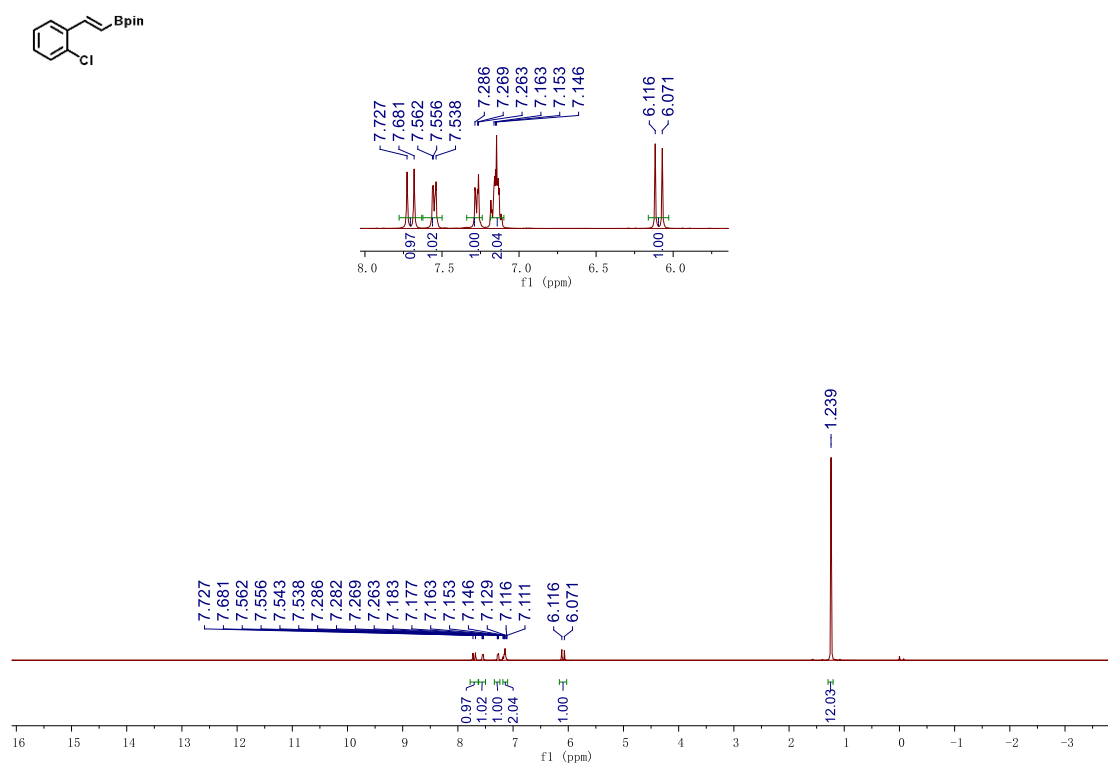

**Figure S49.** <sup>1</sup>H NMR (400 MHz, CDCl<sub>3</sub>) spectrum of compound **2p**.

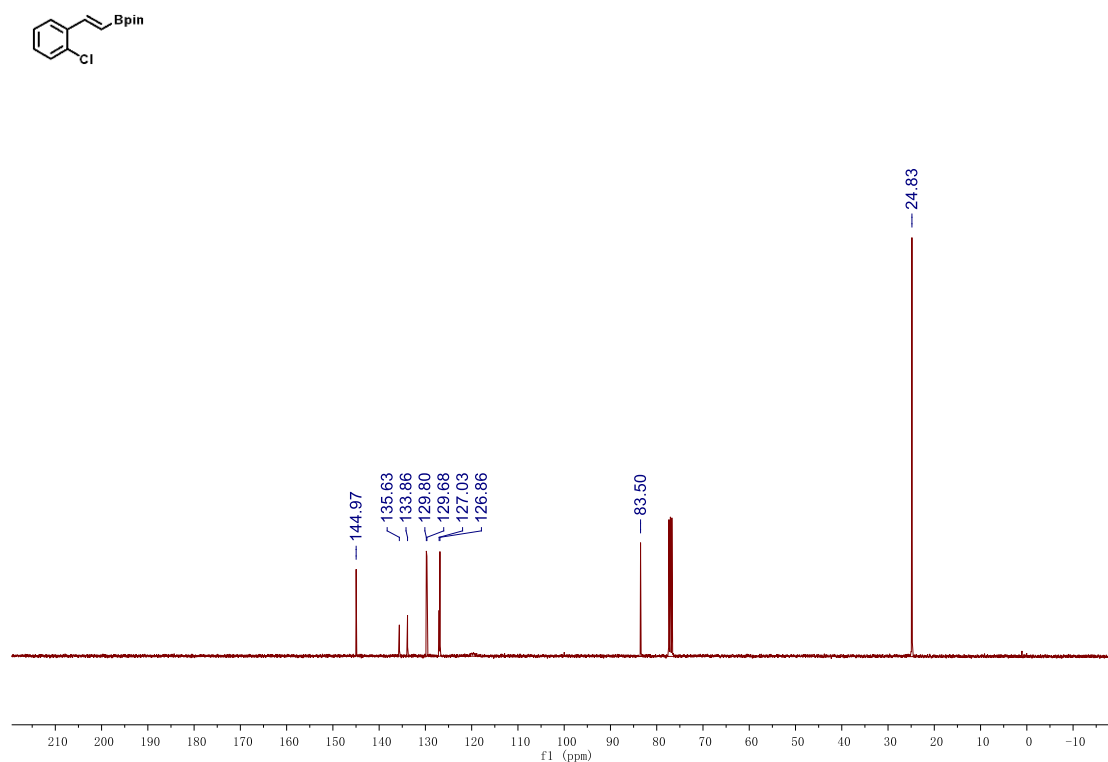

**Figure S50.** <sup>13</sup>C NMR (100 MHz, CDCl<sub>3</sub>) spectrum of compound **2p**.

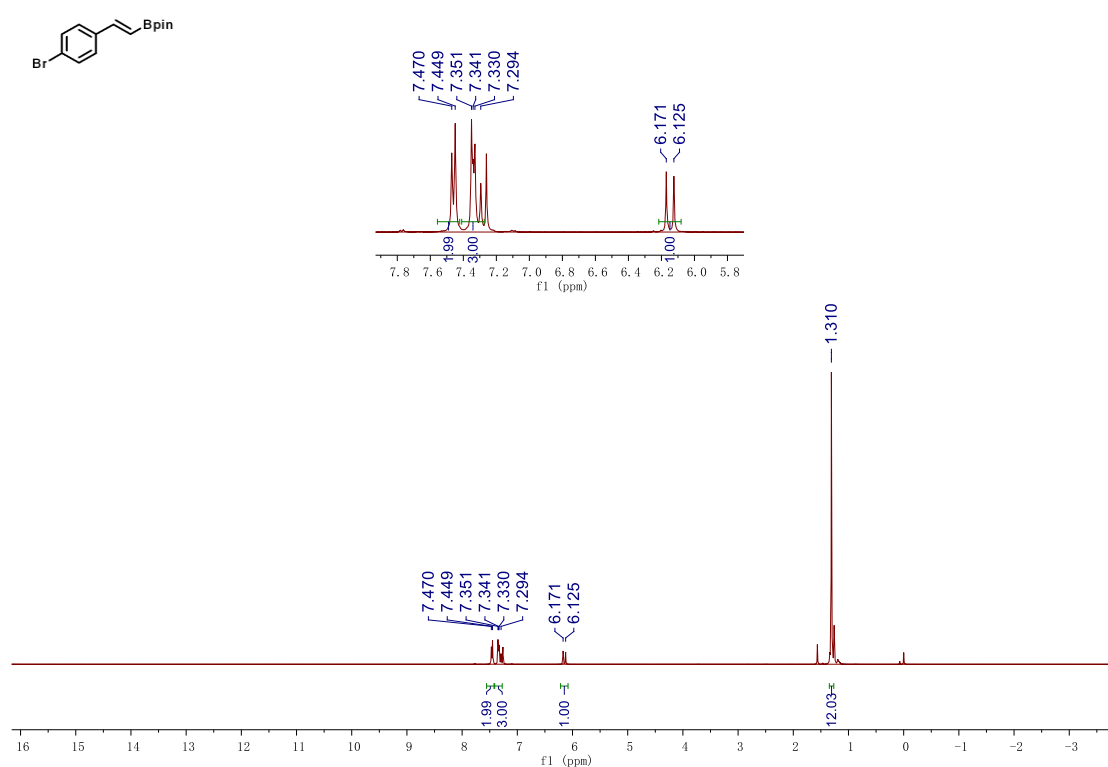

**Figure S51.** <sup>1</sup>H NMR (400 MHz, CDCl<sub>3</sub>) spectrum of compound **2q**.

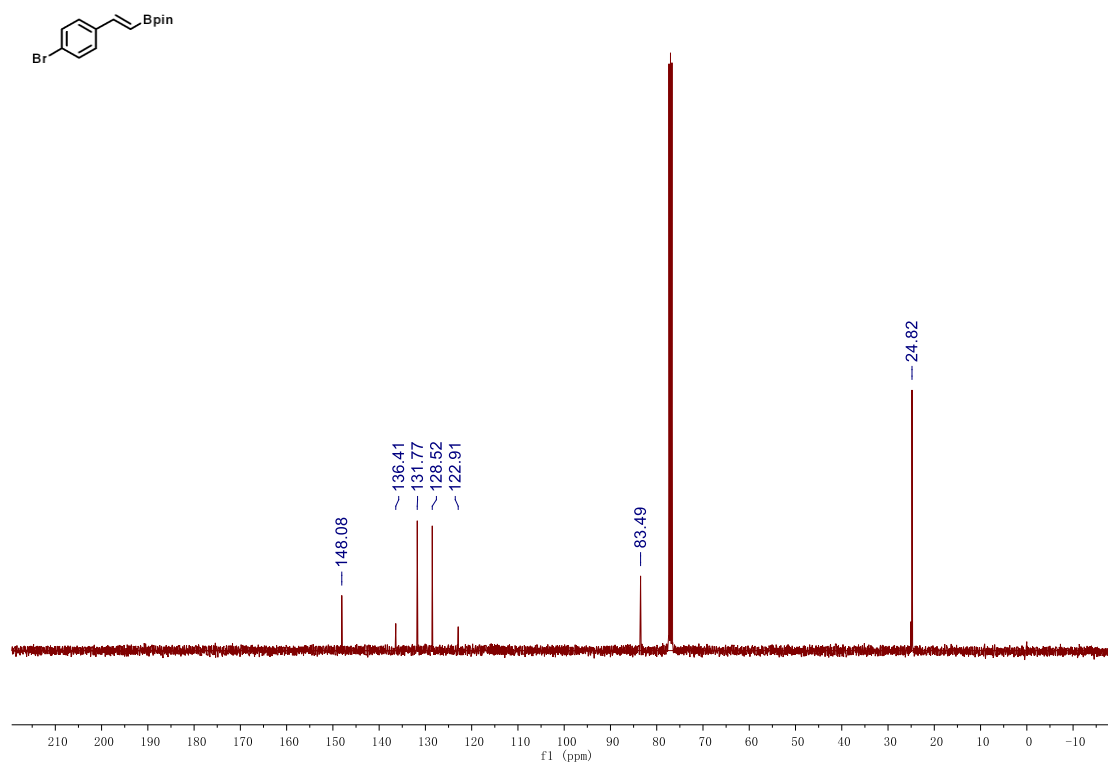

**Figure S52.**  $^{13}\text{C}$  NMR (100 MHz,  $\text{CDCl}_3$ ) spectrum of compound **2q**.

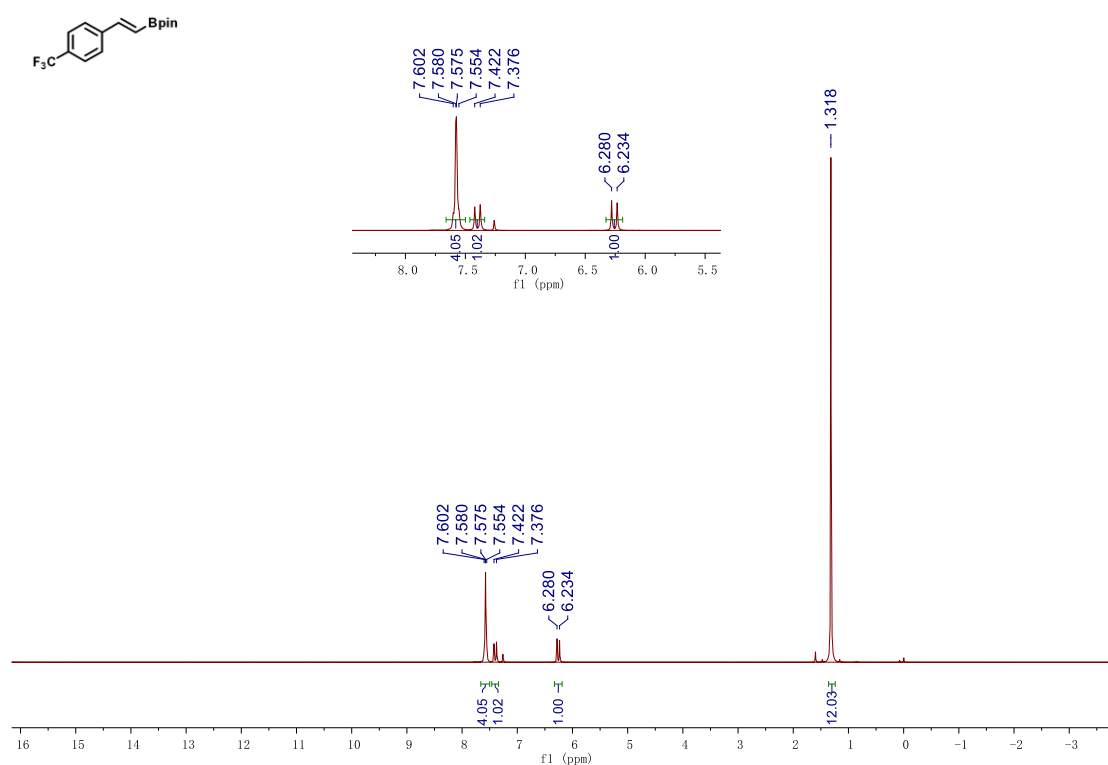

**Figure S53.**  $^1\text{H}$  NMR (400 MHz,  $\text{CDCl}_3$ ) spectrum of compound **2r**.

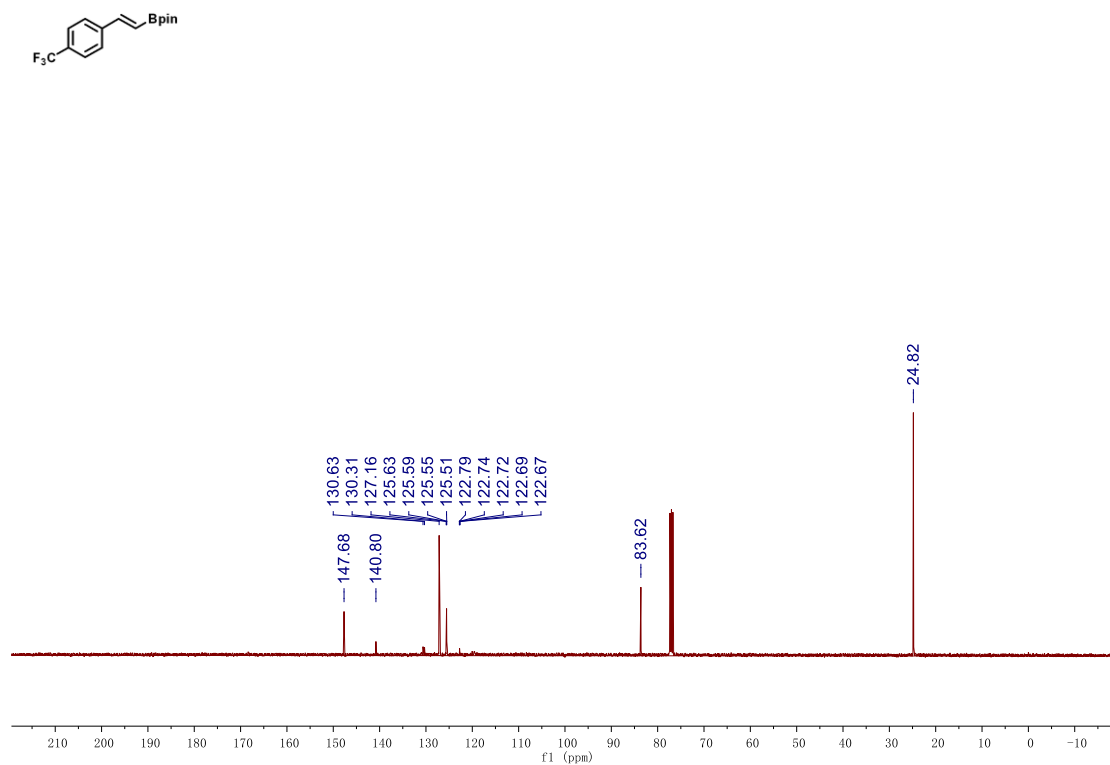

**Figure S54.**  $^{13}\text{C}$  NMR (100 MHz,  $\text{CDCl}_3$ ) spectrum of compound **2r**.

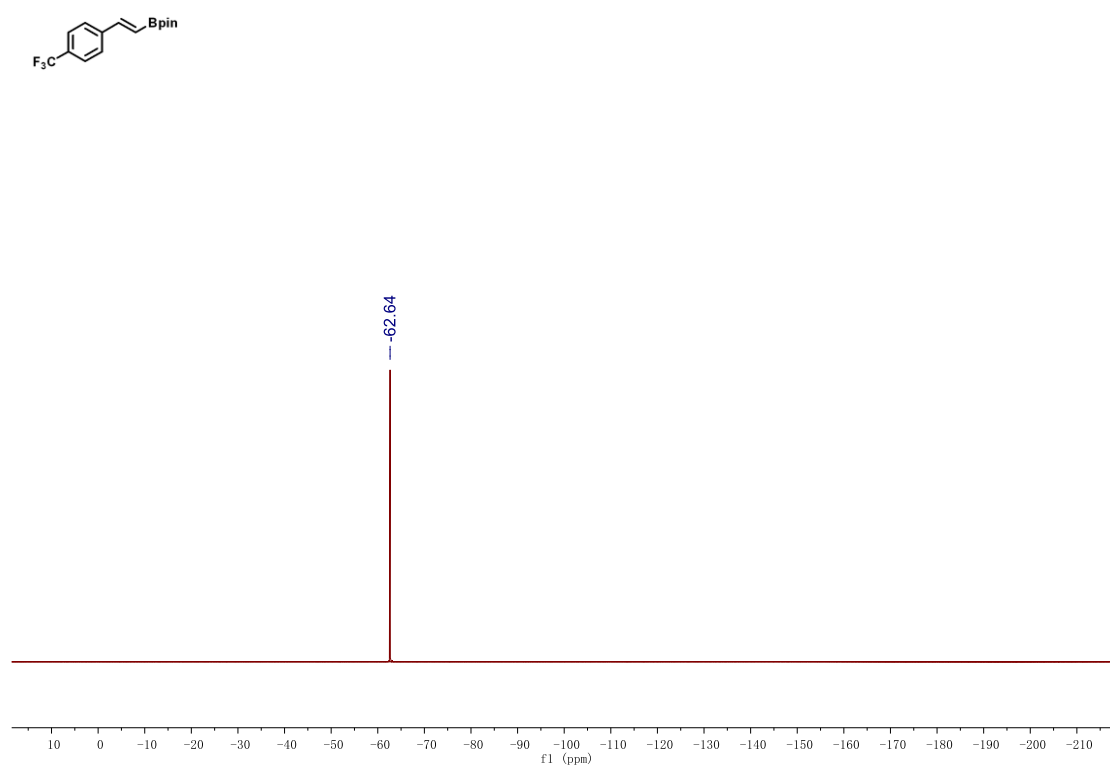

**Figure S55.**  $^{19}\text{F}$  NMR (376 MHz,  $\text{CDCl}_3$ ) spectrum of compound **2r**.

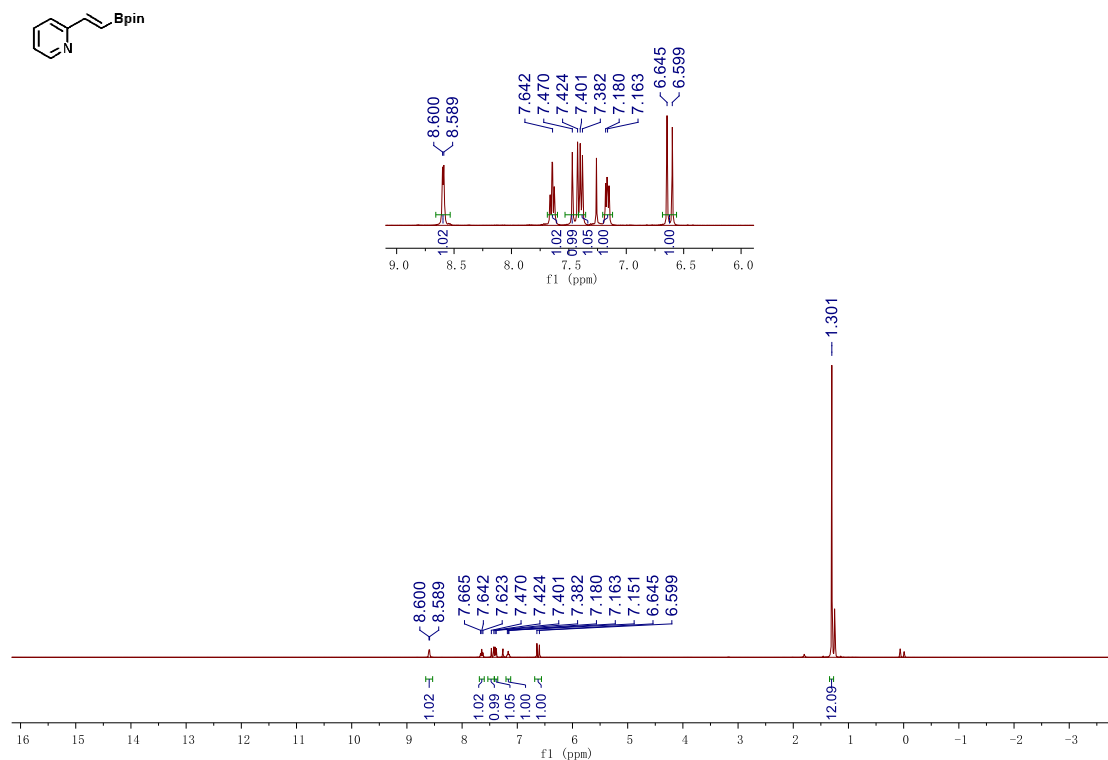

**Figure S56.** <sup>1</sup>H NMR (400 MHz, CDCl<sub>3</sub>) spectrum of compound **2s**.

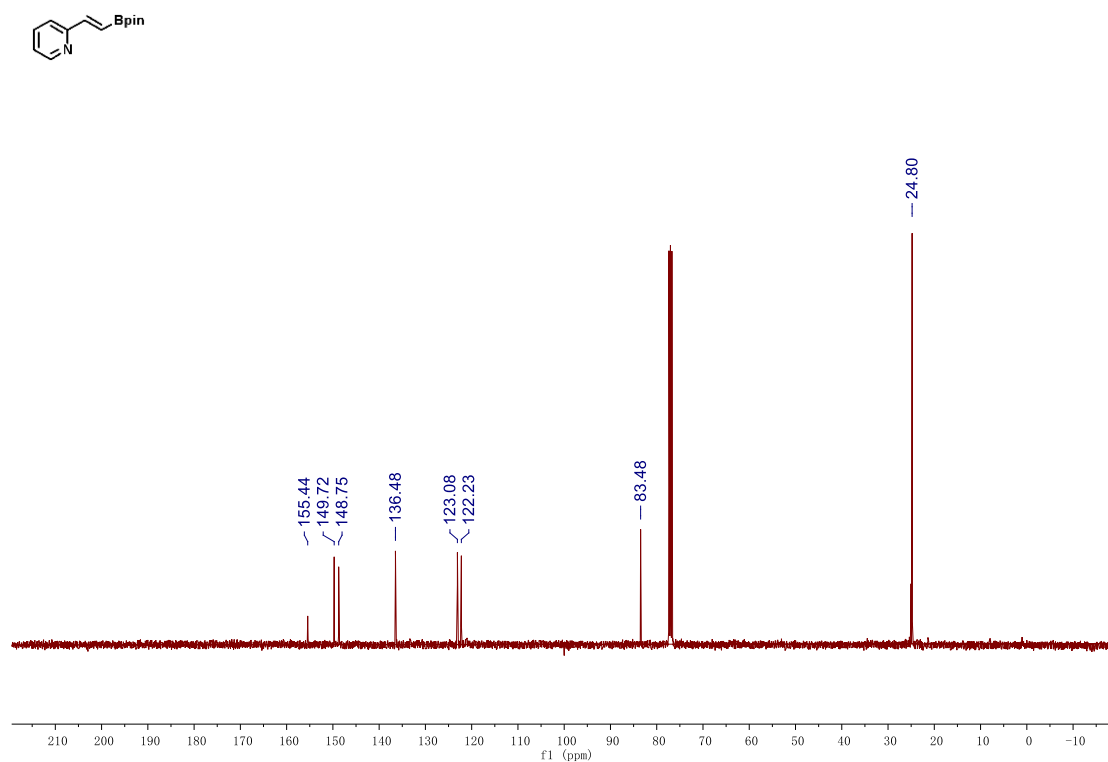

**Figure S57.** <sup>13</sup>C NMR (100 MHz, CDCl<sub>3</sub>) spectrum of compound **2s**

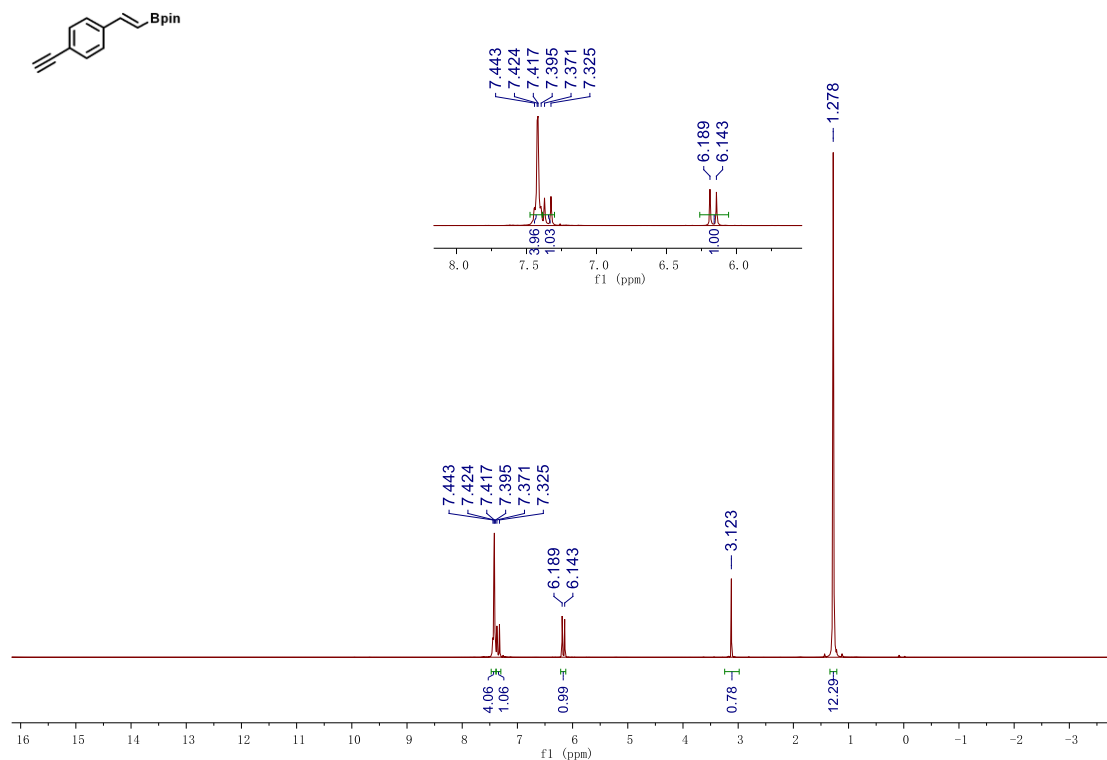

**Figure S58.** <sup>1</sup>H NMR (400 MHz, CDCl<sub>3</sub>) spectrum of compound **2t**.

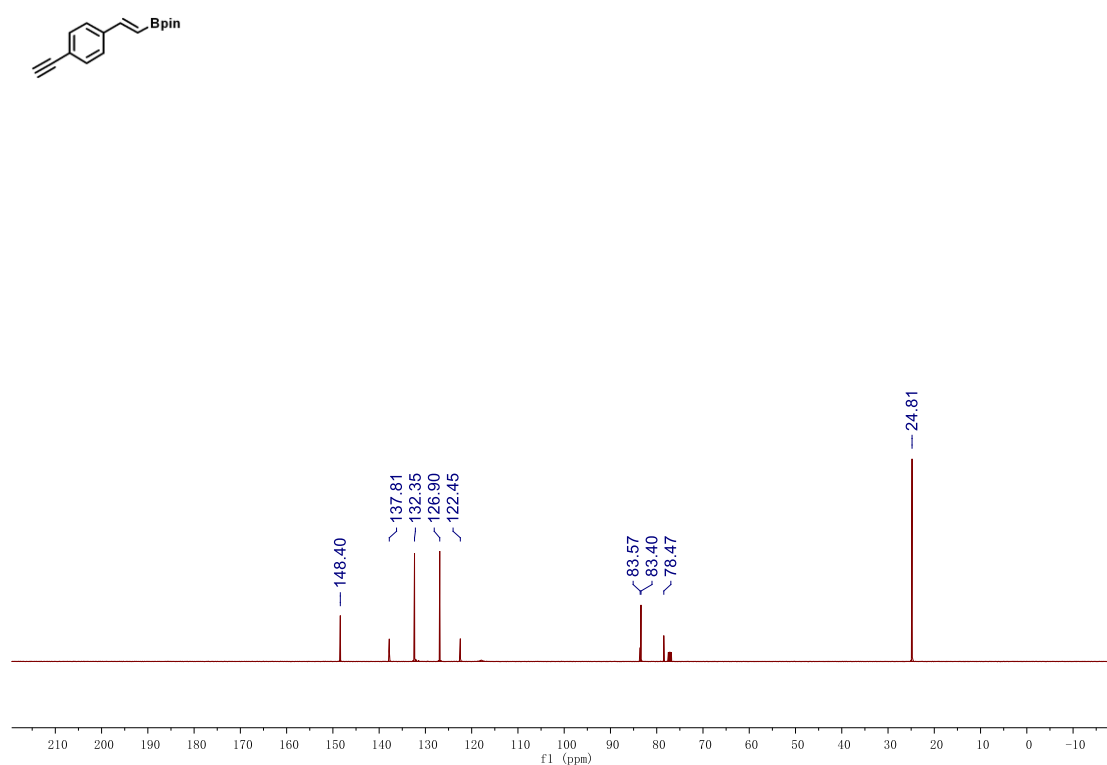

**Figure S59.** <sup>13</sup>C NMR (100 MHz, CDCl<sub>3</sub>) spectrum of compound **2t**.

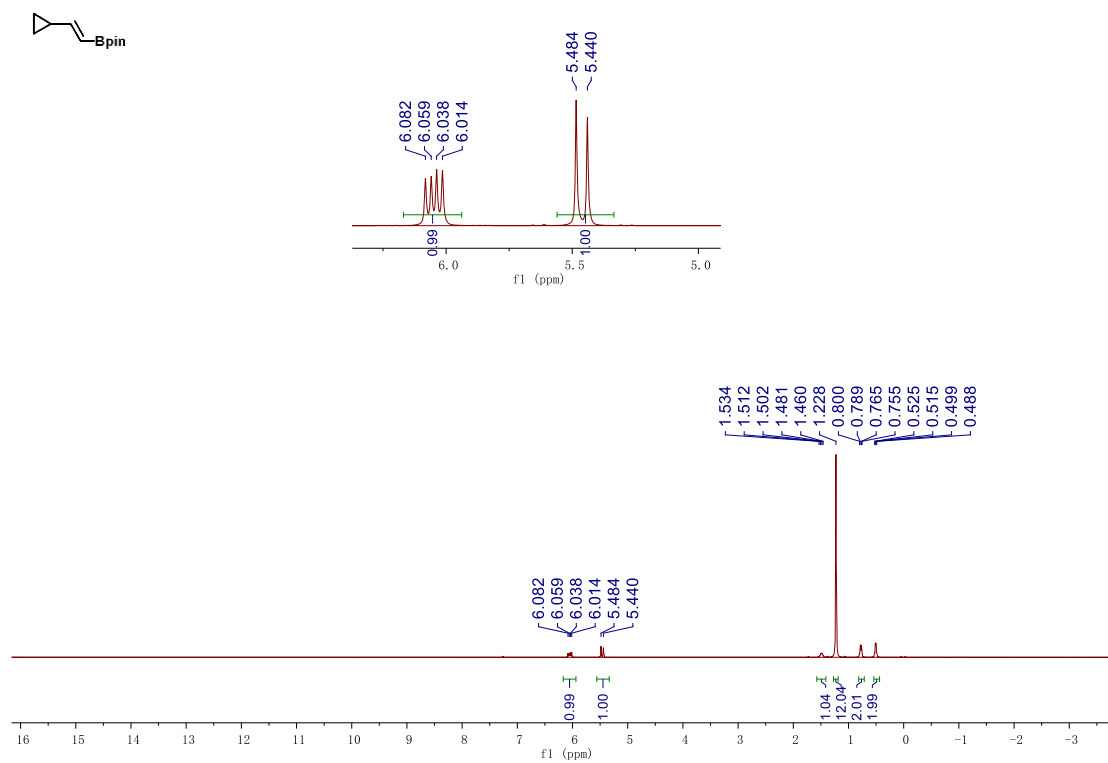

**Figure S60.** <sup>1</sup>H NMR (400 MHz, CDCl<sub>3</sub>) spectrum of compound **2u**.

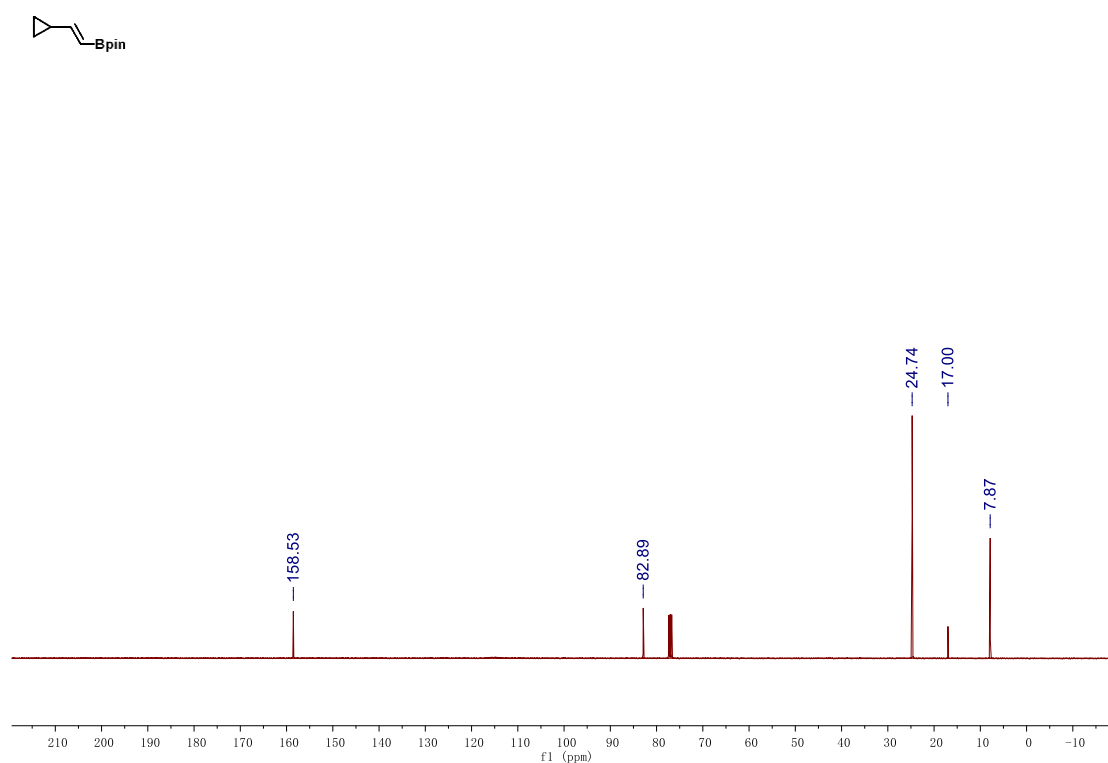

**Figure S61.** <sup>13</sup>C NMR (100 MHz, CDCl<sub>3</sub>) spectrum of compound **2u**.

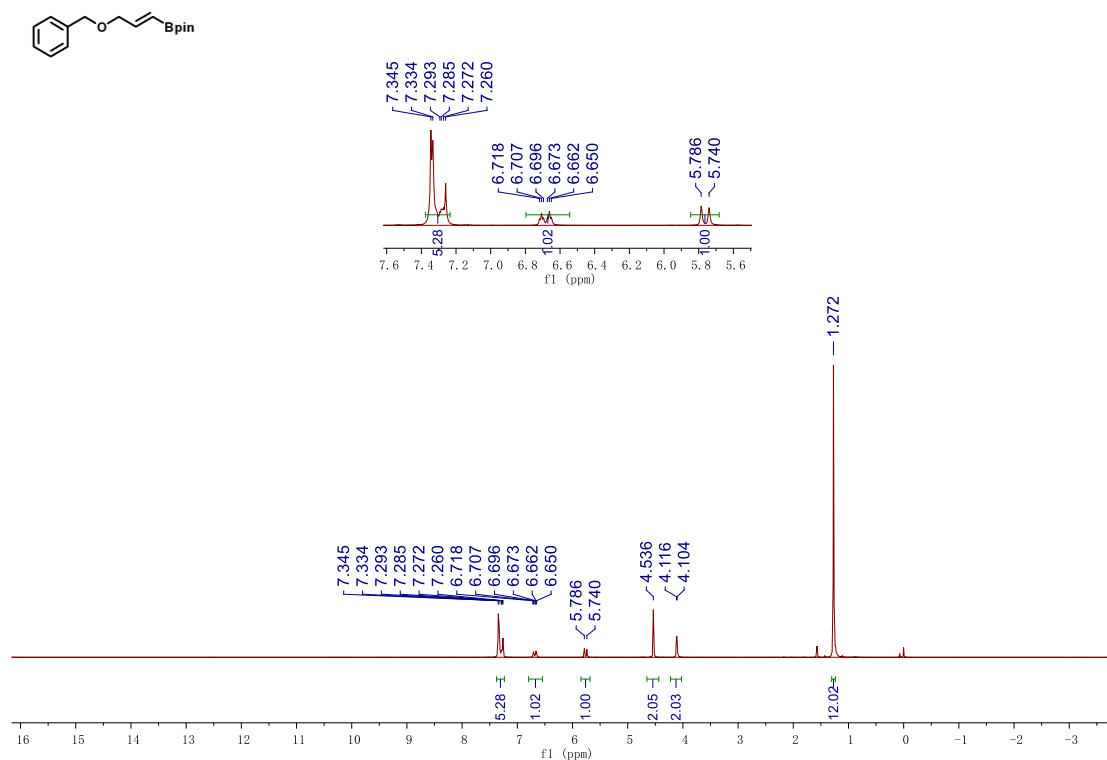

**Figure S62.** <sup>1</sup>H NMR (400 MHz, CDCl<sub>3</sub>) spectrum of compound **2v**.

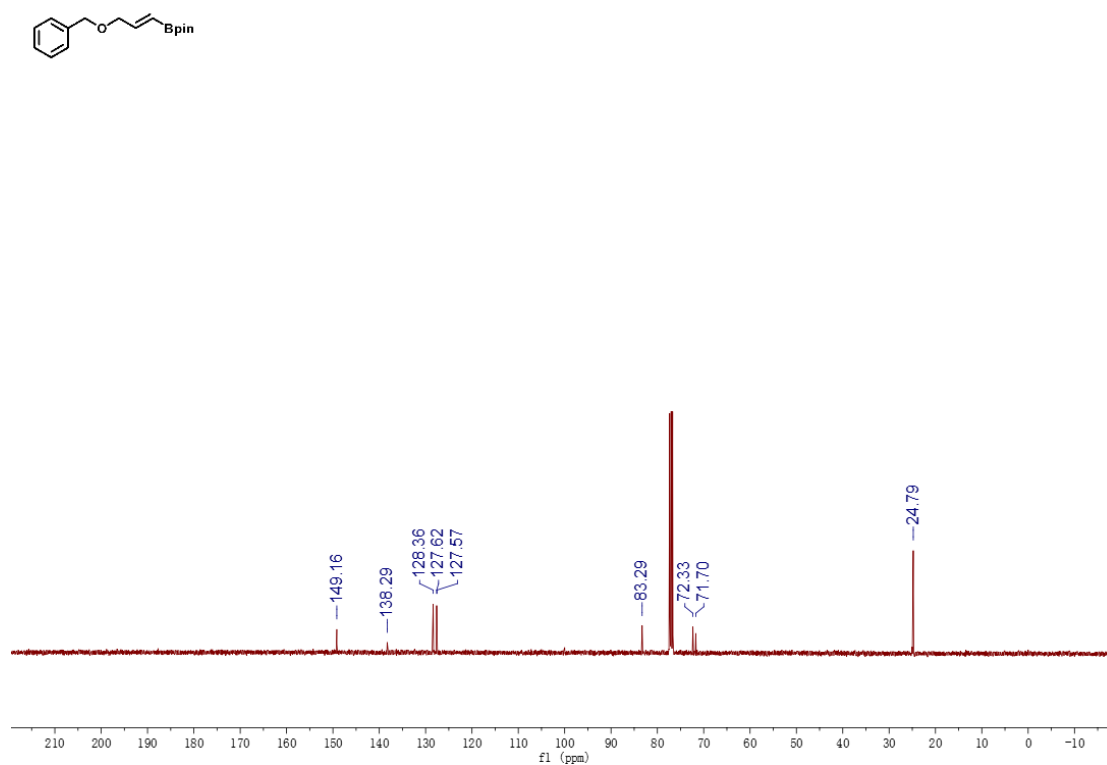

**Figure S63.** <sup>13</sup>C NMR (100 MHz, CDCl<sub>3</sub>) spectrum of compound **2v**.

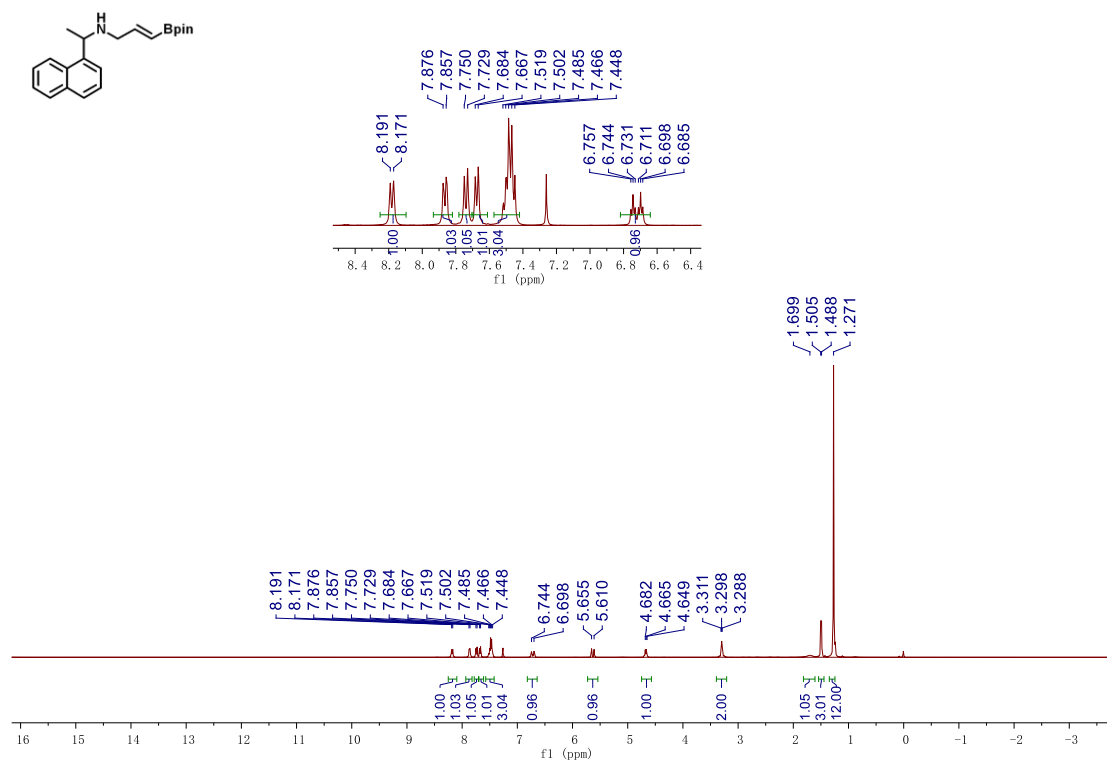

**Figure S64.** <sup>1</sup>H NMR (400 MHz, CDCl<sub>3</sub>) spectrum of compound **2w**.

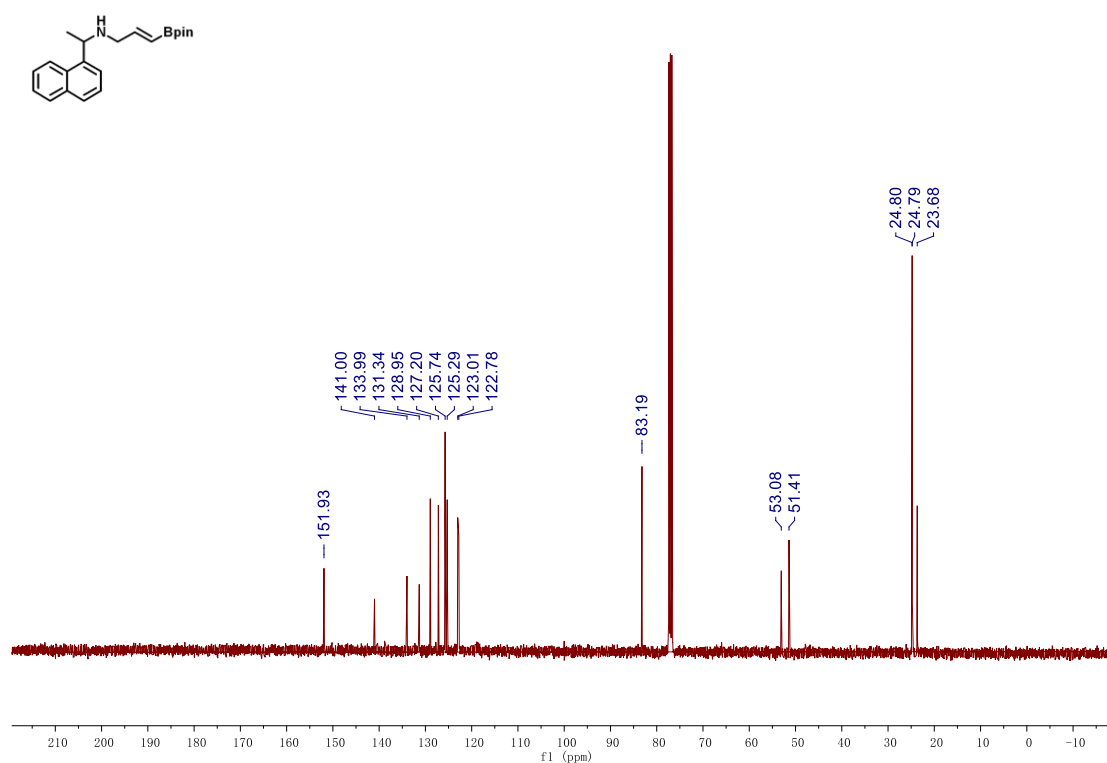

**Figure S65.** <sup>13</sup>C NMR (100 MHz, CDCl<sub>3</sub>) spectrum of compound **2w**.

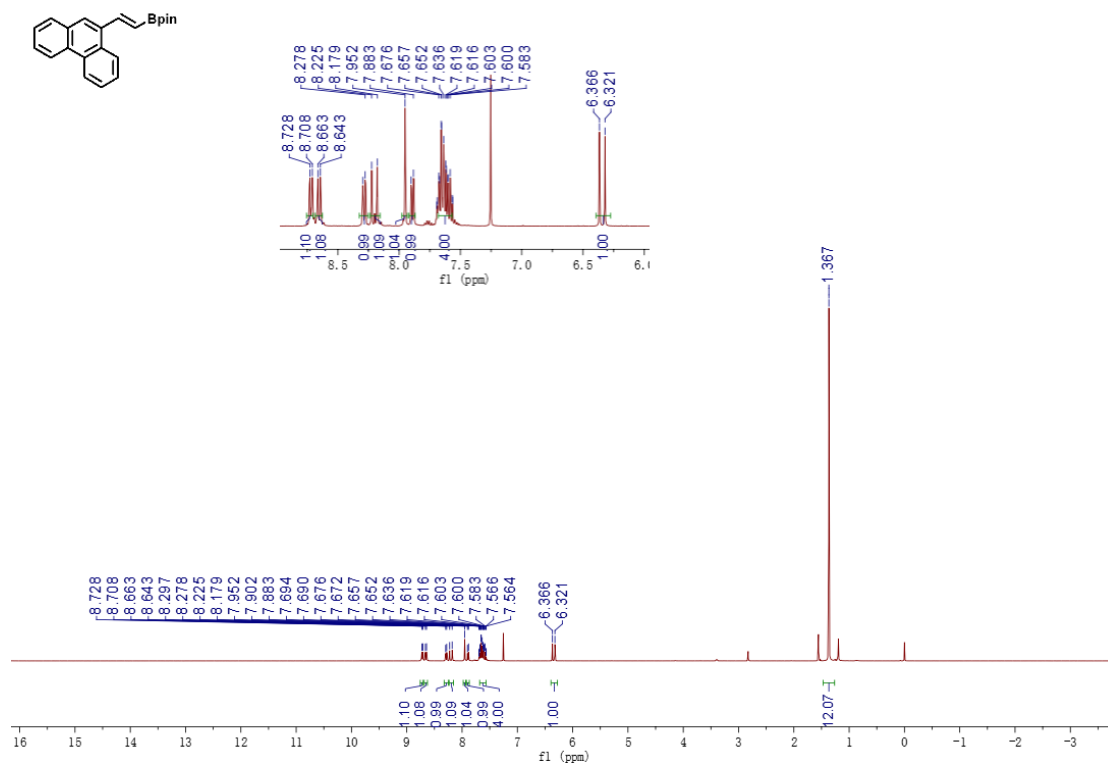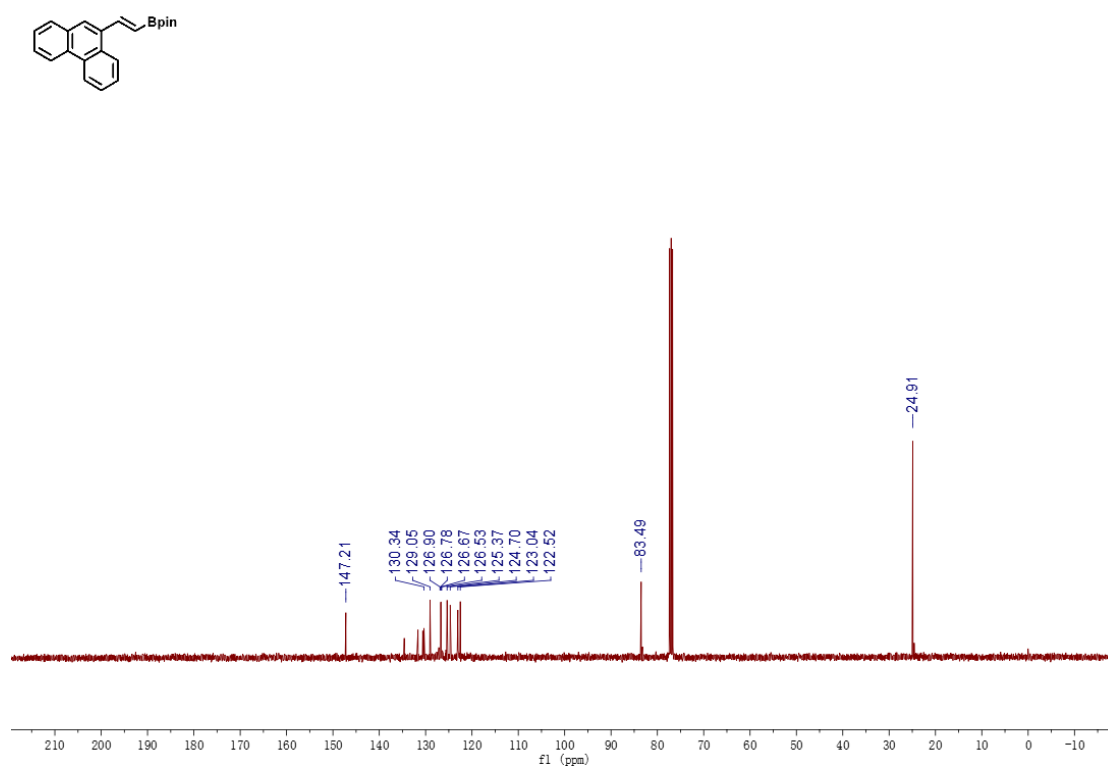

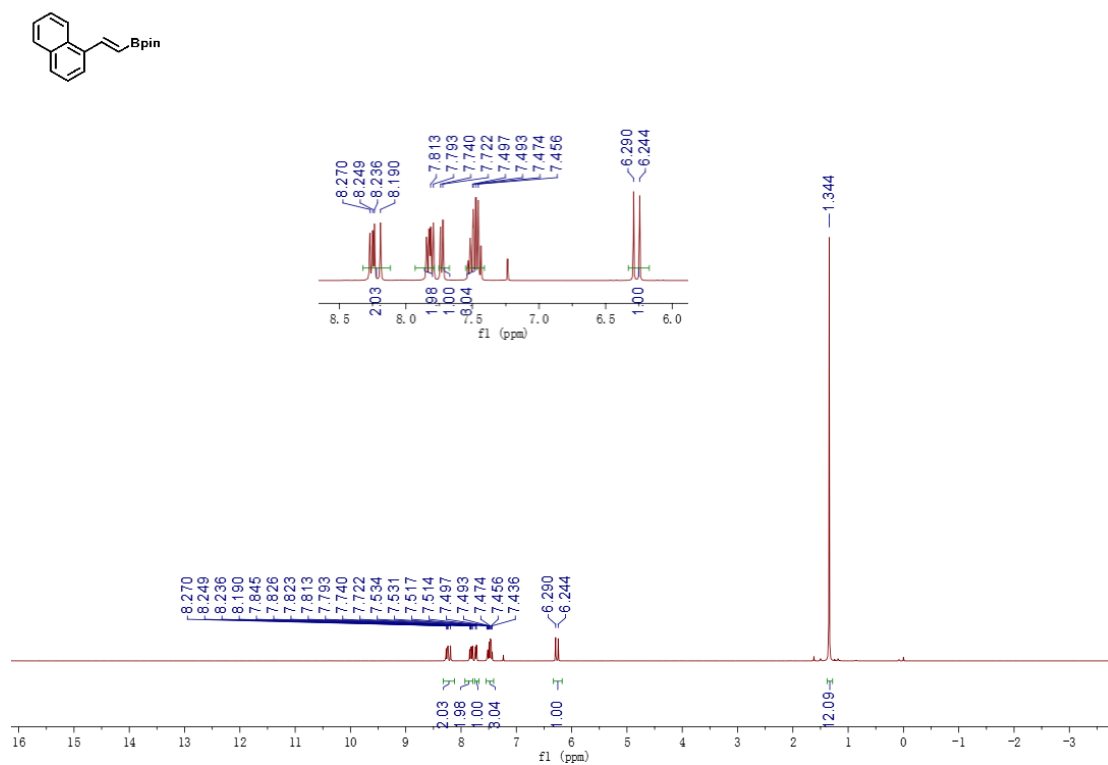

**Figure S68.** <sup>1</sup>H NMR (400 MHz, CDCl<sub>3</sub>) spectrum of compound **2y**.

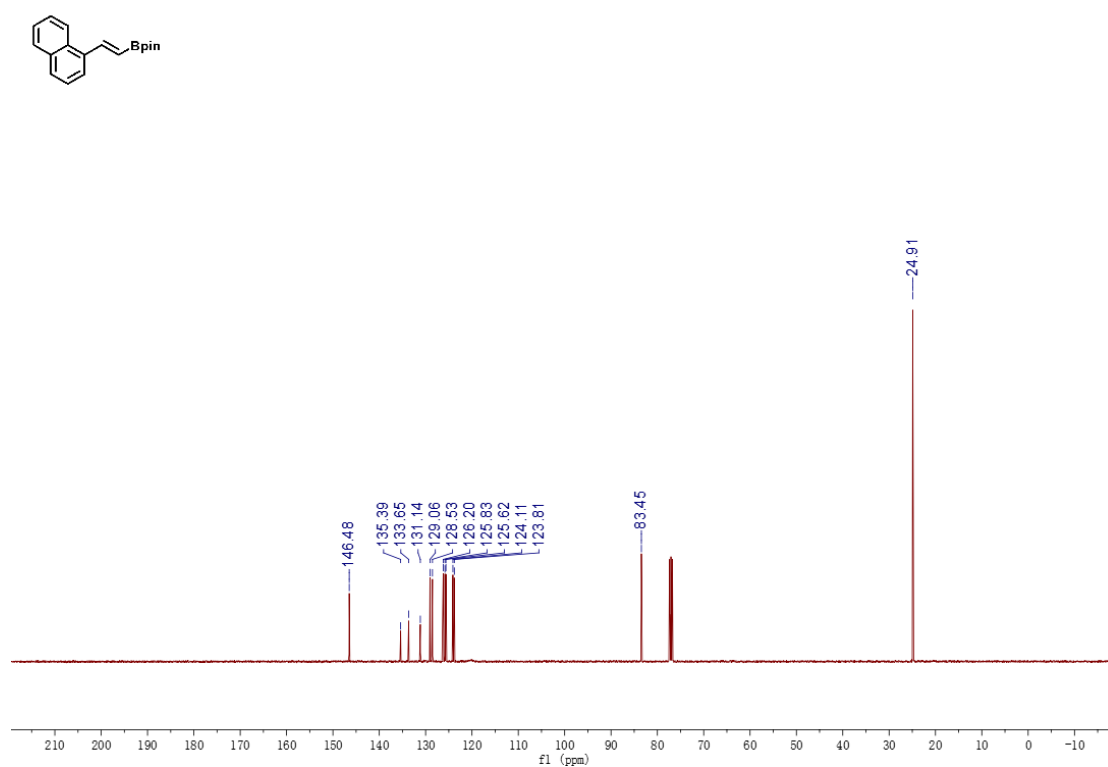

**Figure S69.** <sup>13</sup>C NMR (100 MHz, CDCl<sub>3</sub>) spectrum of compound **2y**.

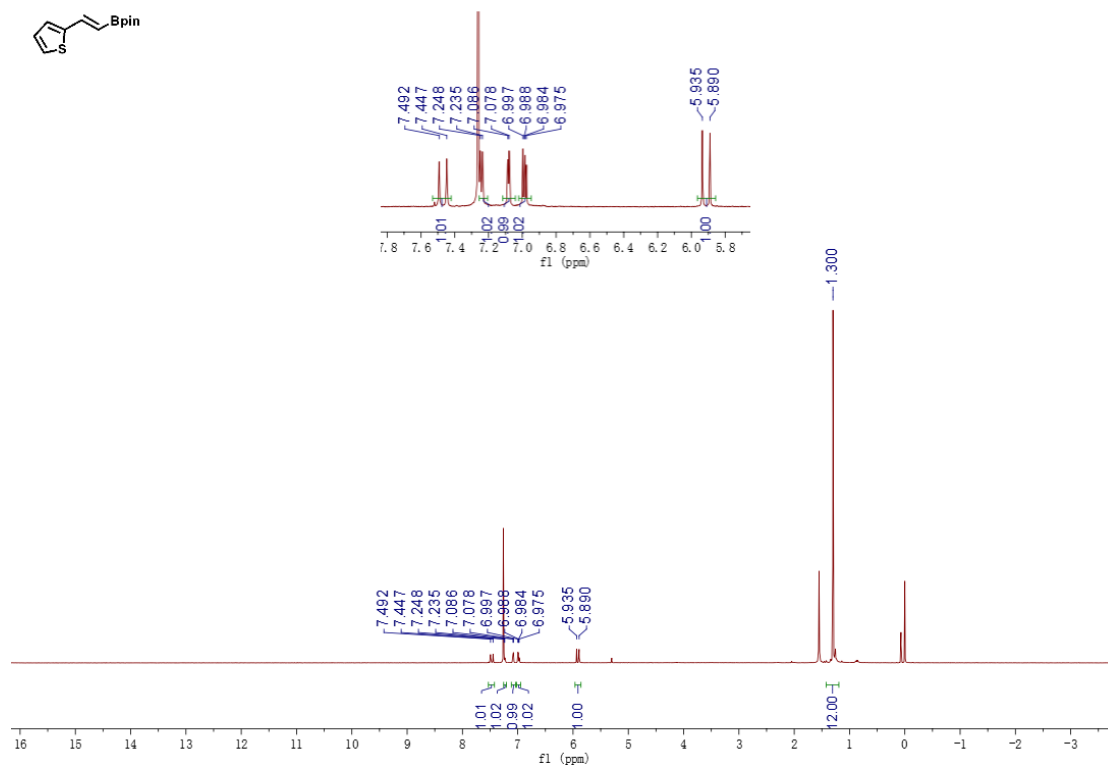

**Figure S70.** <sup>1</sup>H NMR (400 MHz, CDCl<sub>3</sub>) spectrum of compound **2z**.

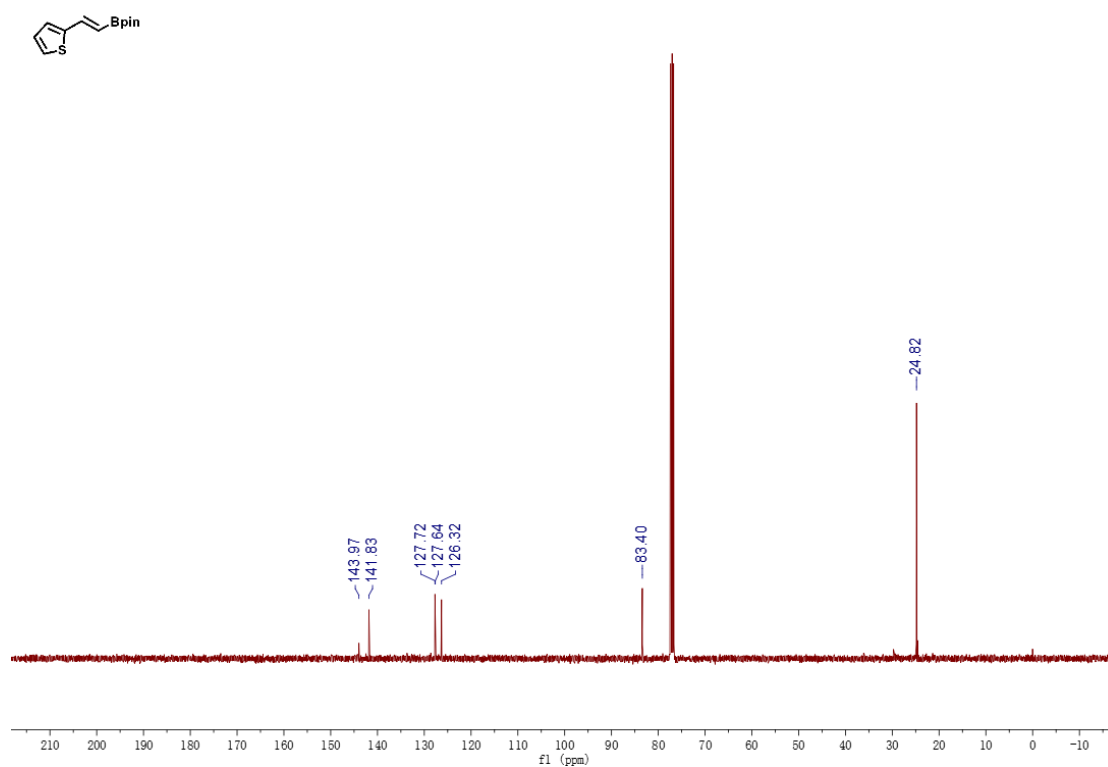

**Figure S71.** <sup>13</sup>C NMR (100 MHz, CDCl<sub>3</sub>) spectrum of compound **2z**.

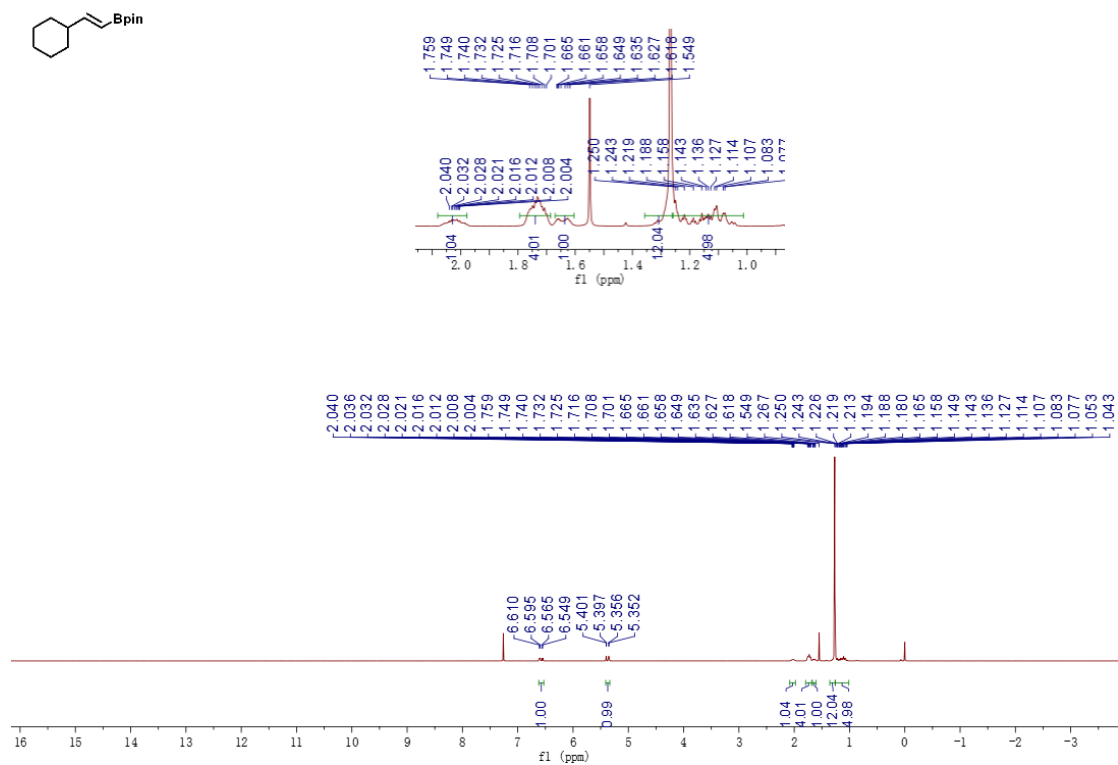

**Figure S72.** <sup>1</sup>H NMR (400 MHz, CDCl<sub>3</sub>) spectrum of compound **2aa**.

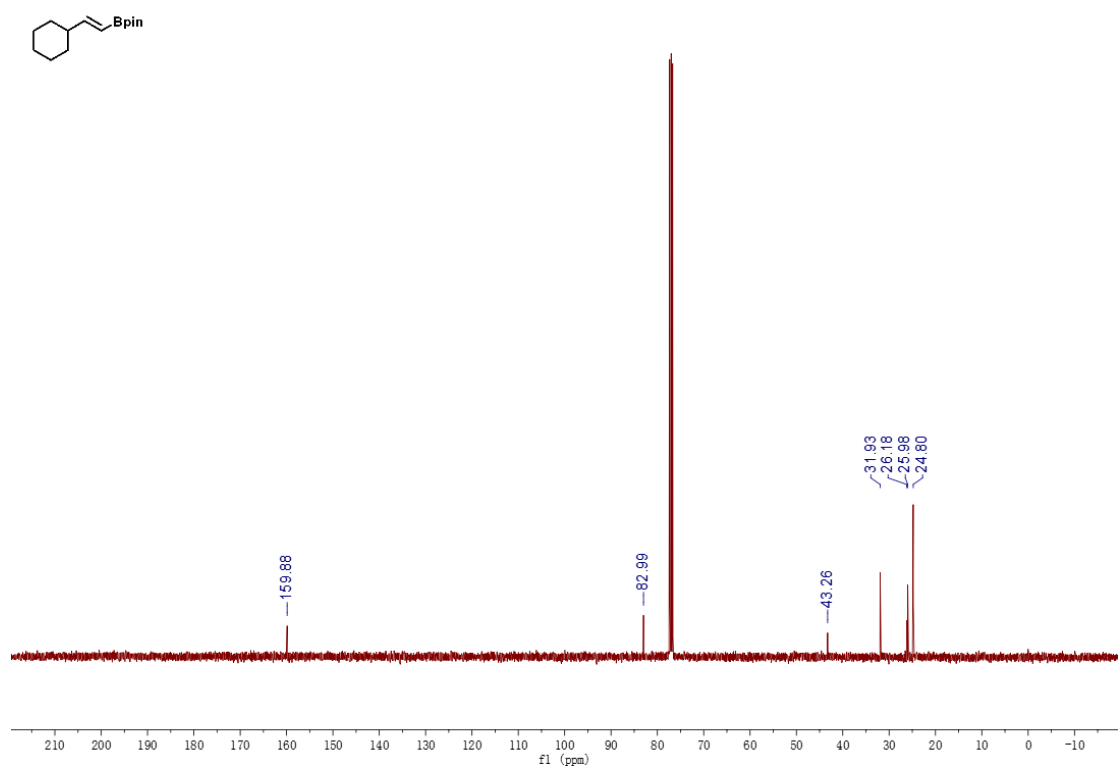

**Figure S73.** <sup>13</sup>C NMR (100 MHz, CDCl<sub>3</sub>) spectrum of compound **2aa**.

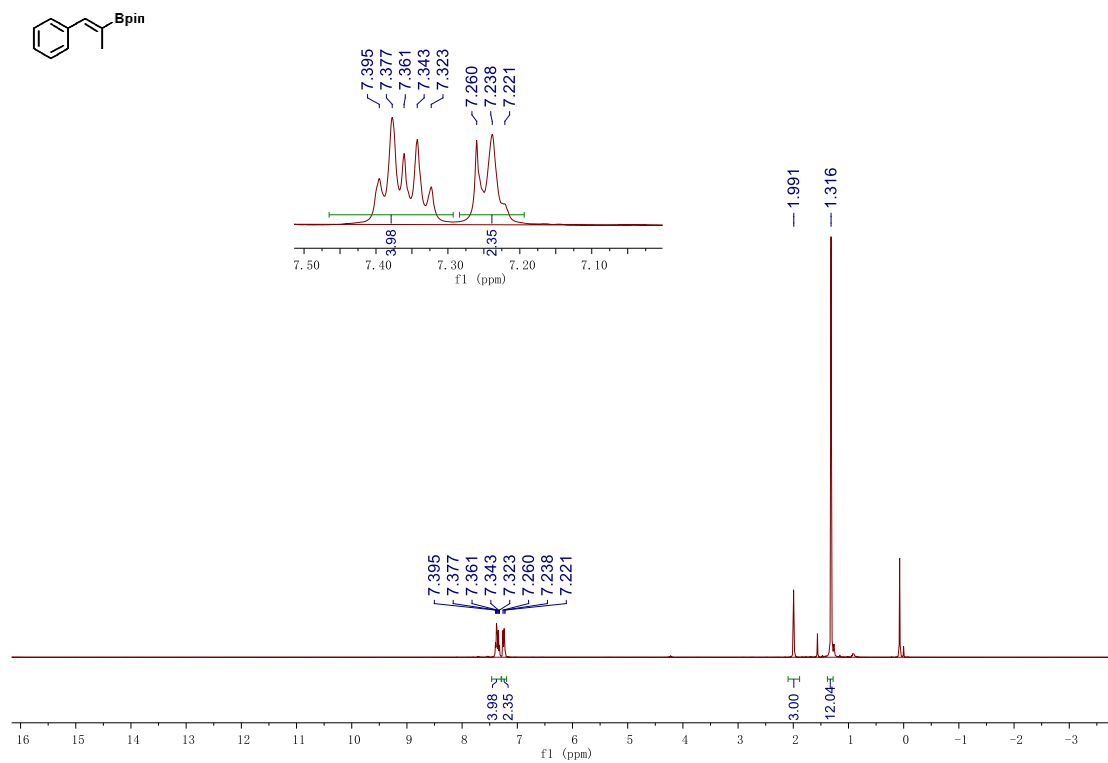

**Figure S74.** <sup>1</sup>H NMR (400 MHz, CDCl<sub>3</sub>) spectrum of compound **2bb**.

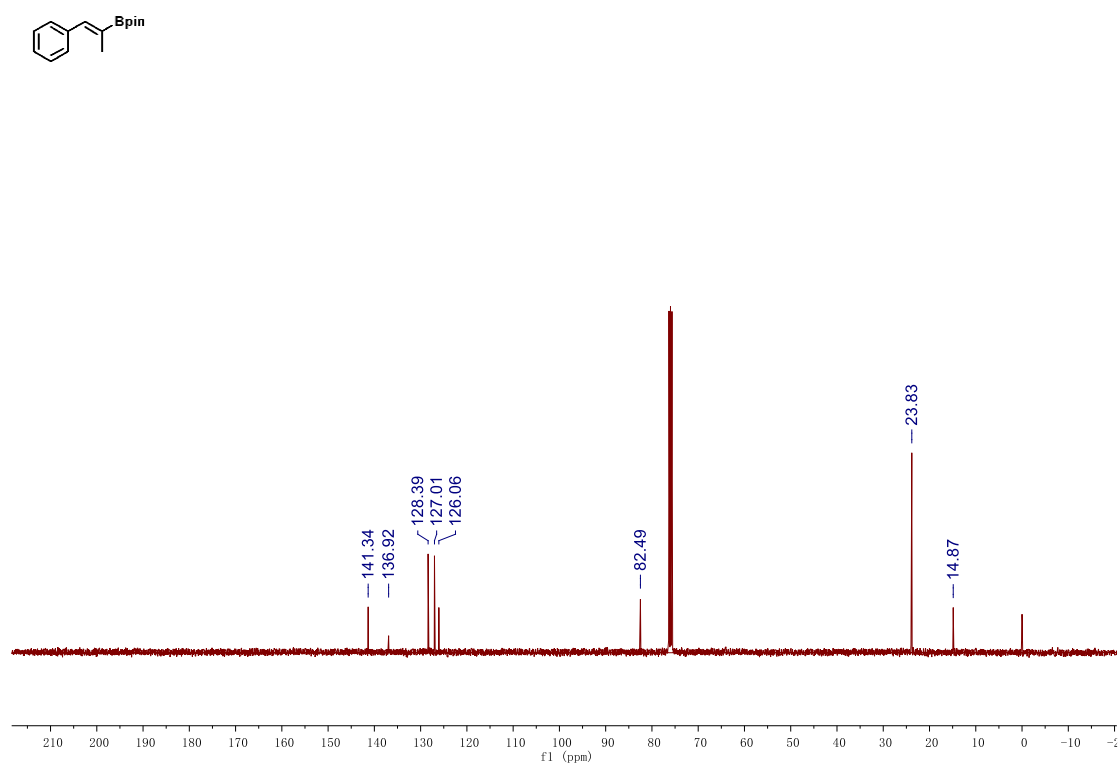

**Figure S75.** <sup>13</sup>C NMR (100 MHz, CDCl<sub>3</sub>) spectrum of compound **2bb**.

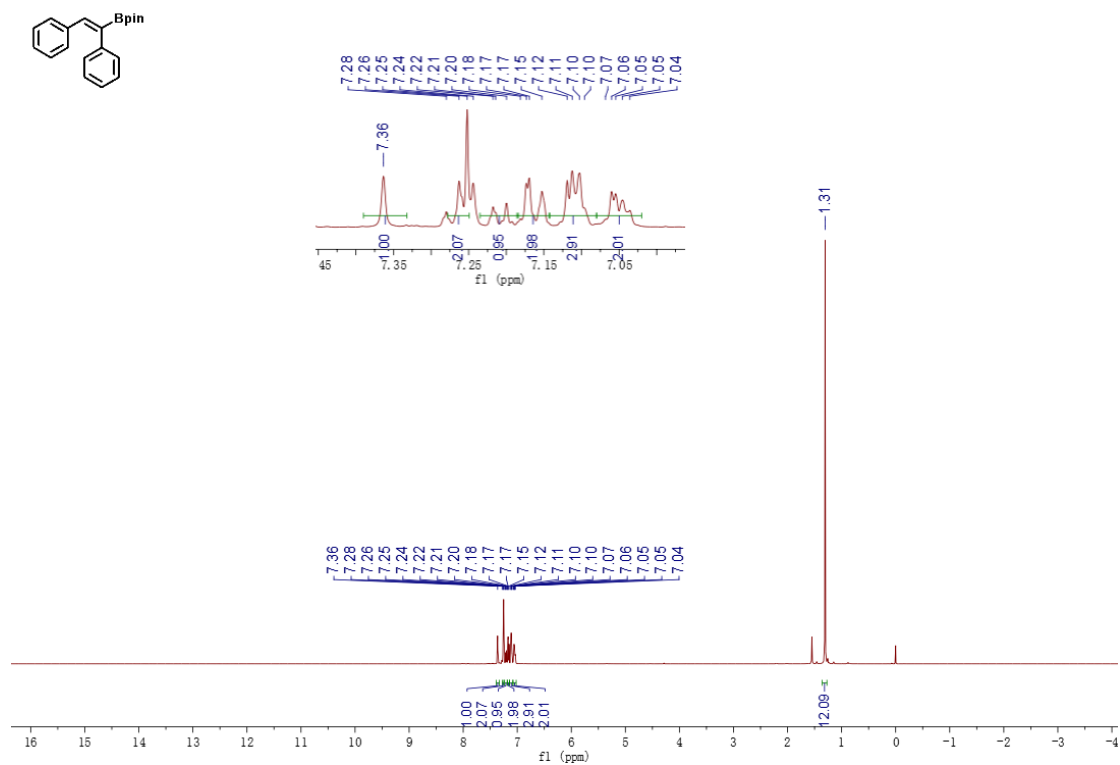

**Figure S76.** <sup>1</sup>H NMR (400 MHz, CDCl<sub>3</sub>) spectrum of compound **2cc**.

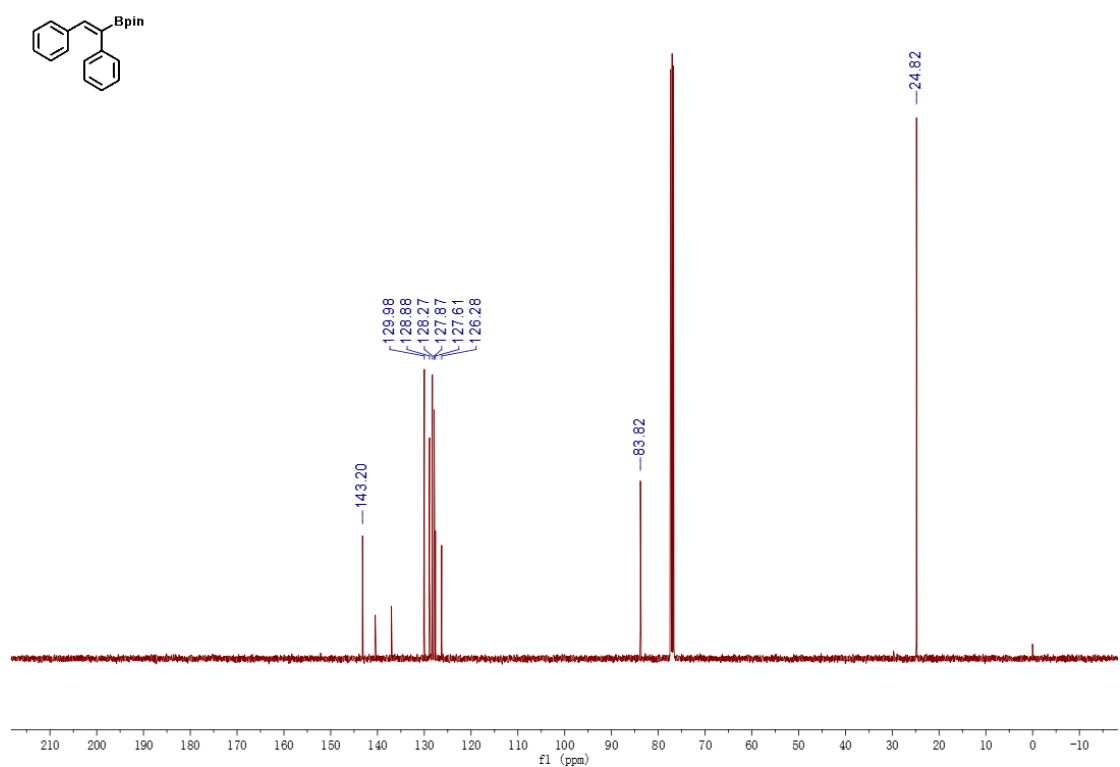

**Figure S77.** <sup>13</sup>C NMR (100 MHz, CDCl<sub>3</sub>) spectrum of compound **2cc**.

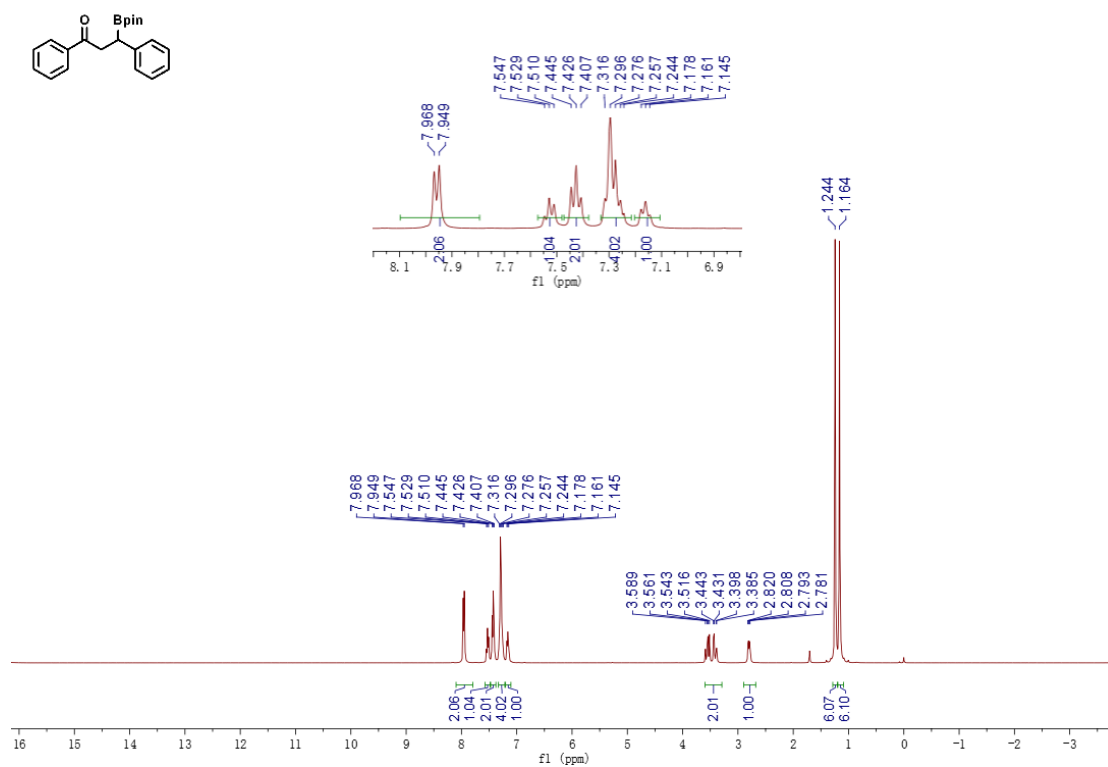

**Figure S78.**  $^1\text{H}$  NMR (400 MHz,  $\text{CDCl}_3$ ) spectrum of compound **2dd**.

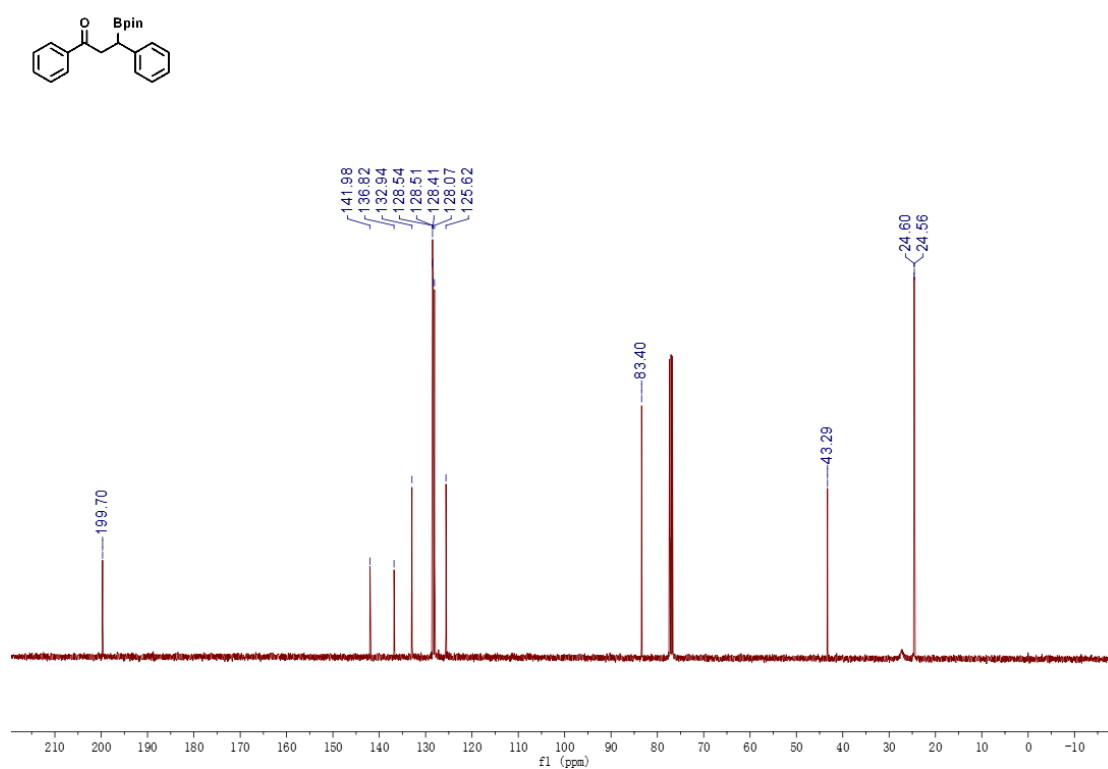

**Figure S79.**  $^{13}\text{C}$  NMR (100 MHz,  $\text{CDCl}_3$ ) spectrum of compound **2dd**.

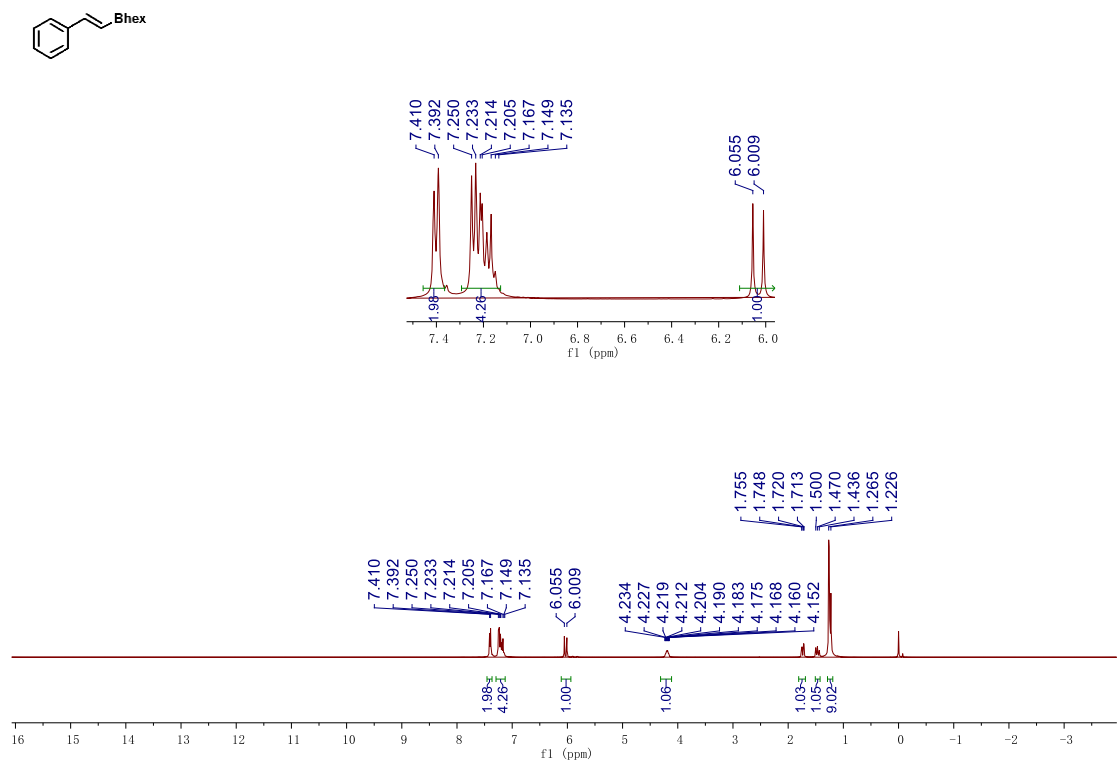

**Figure S80** <sup>1</sup>H NMR (400 MHz, CDCl<sub>3</sub>) spectrum of compound **2ee**.

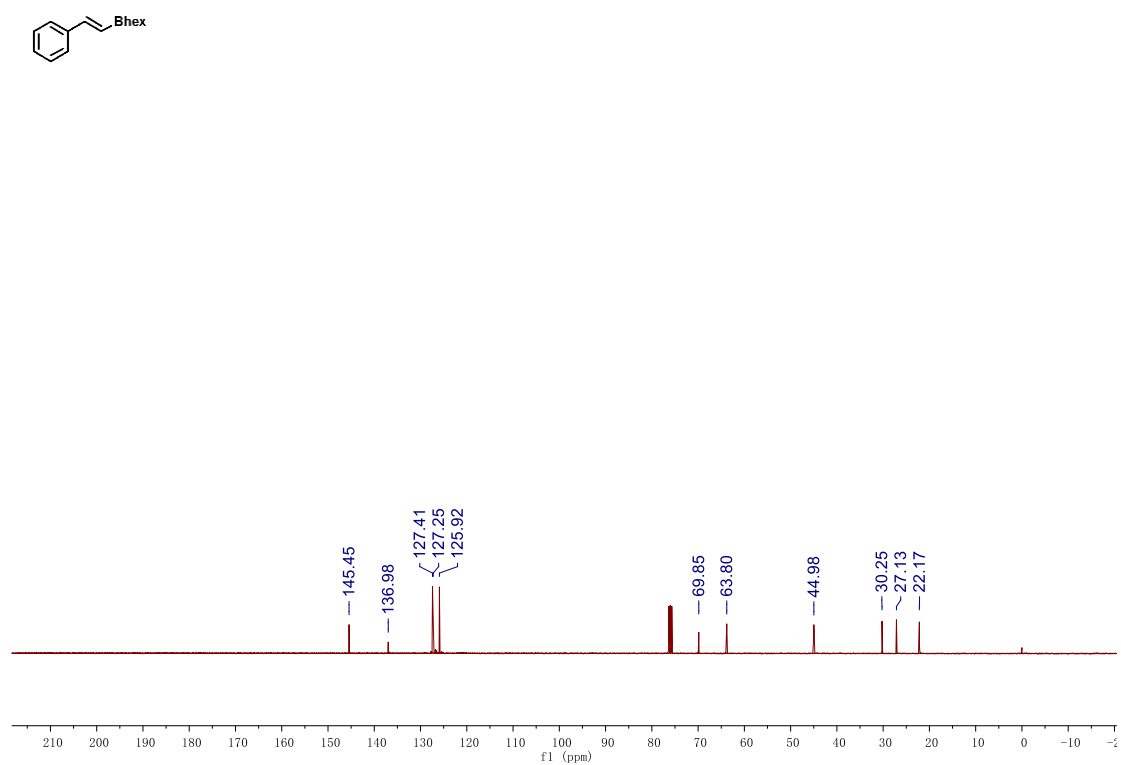

**Figure S81.** <sup>13</sup>C NMR (100 MHz, CDCl<sub>3</sub>) spectrum of compound **2ee**.

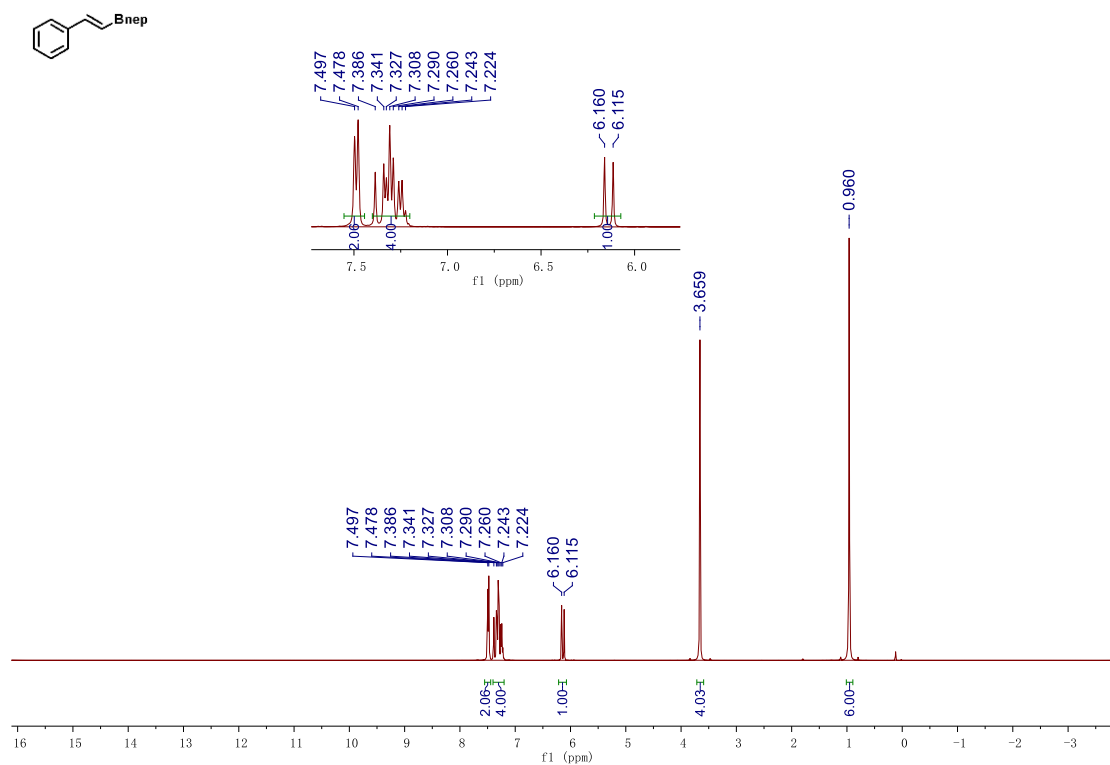

**Figure S82.** <sup>1</sup>H NMR (400 MHz, CDCl<sub>3</sub>) spectrum of compound **2ff**.

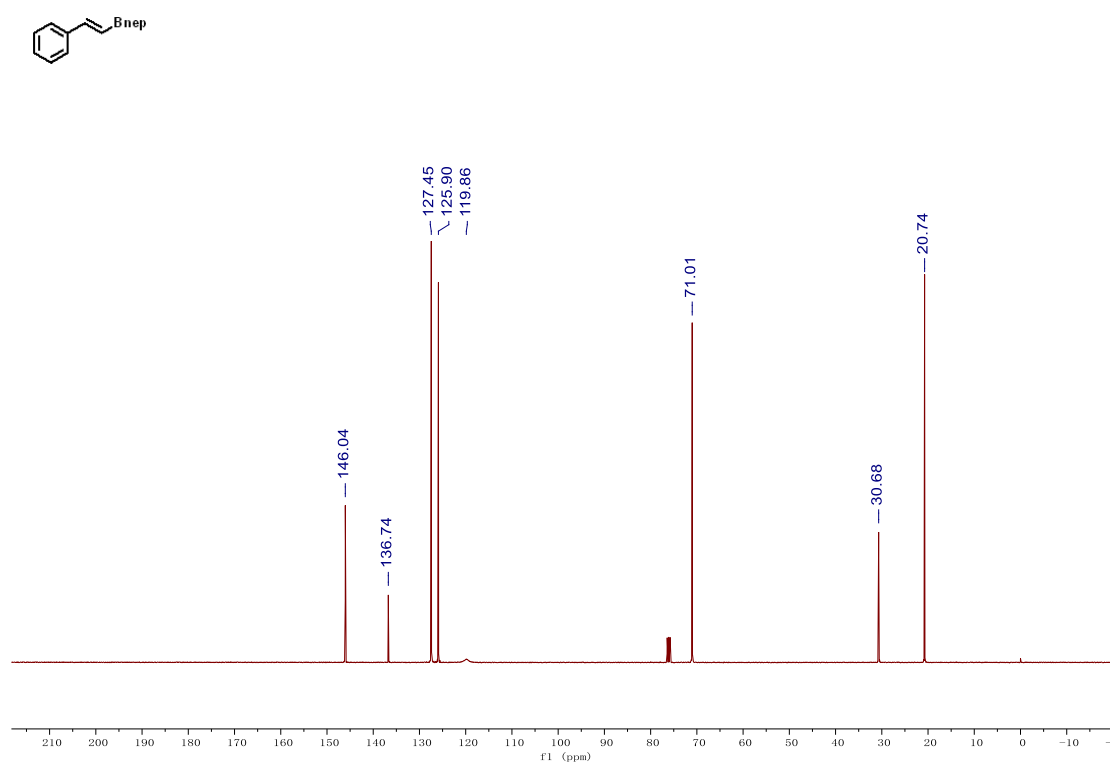

**Figure S83.** <sup>13</sup>C NMR (100 MHz, CDCl<sub>3</sub>) spectrum of compound **2ff**.

## 12. NMR Spectra for Functionalized Products

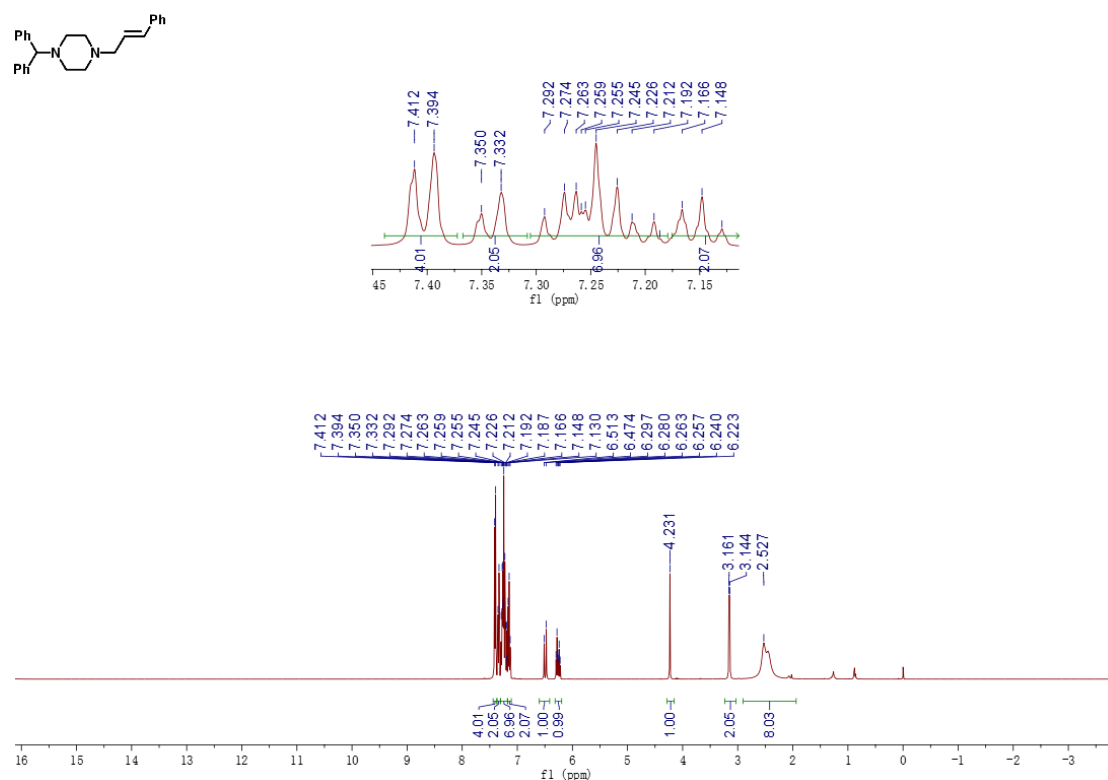

**Figure S84.** <sup>1</sup>H NMR (400 MHz, CDCl<sub>3</sub>) spectrum of compound **3a**.

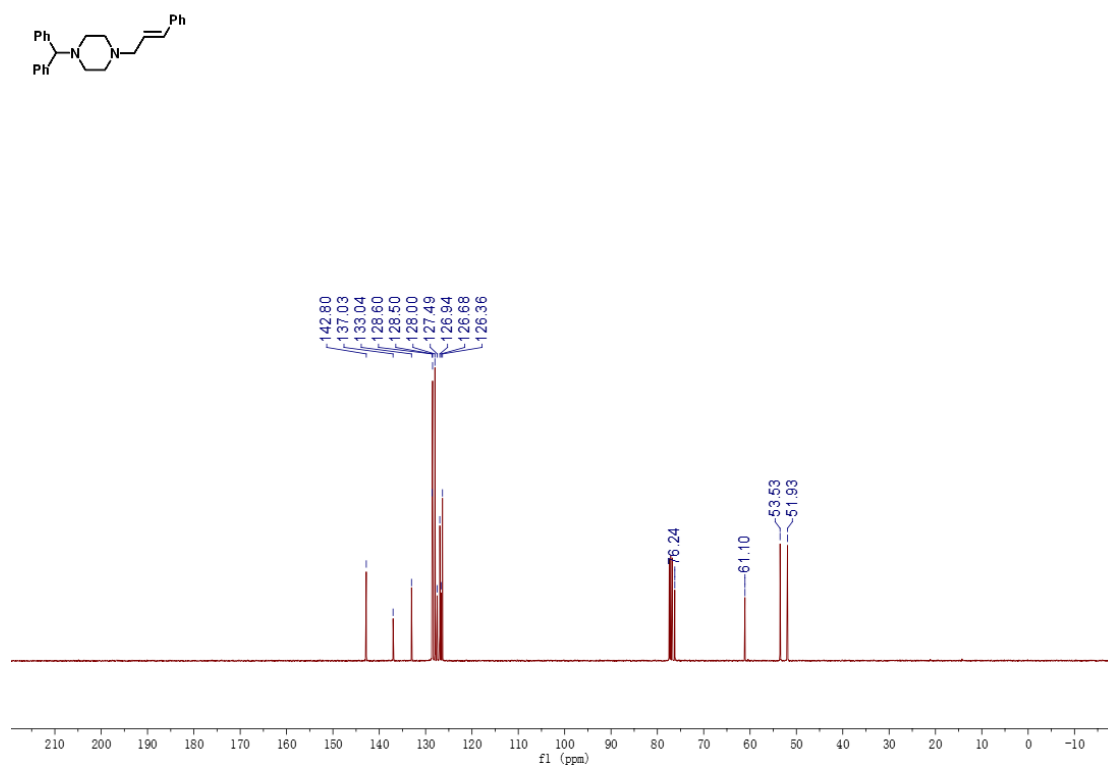

**Figure S85.** <sup>13</sup>C NMR (100 MHz, CDCl<sub>3</sub>) spectrum of compound **3a**.

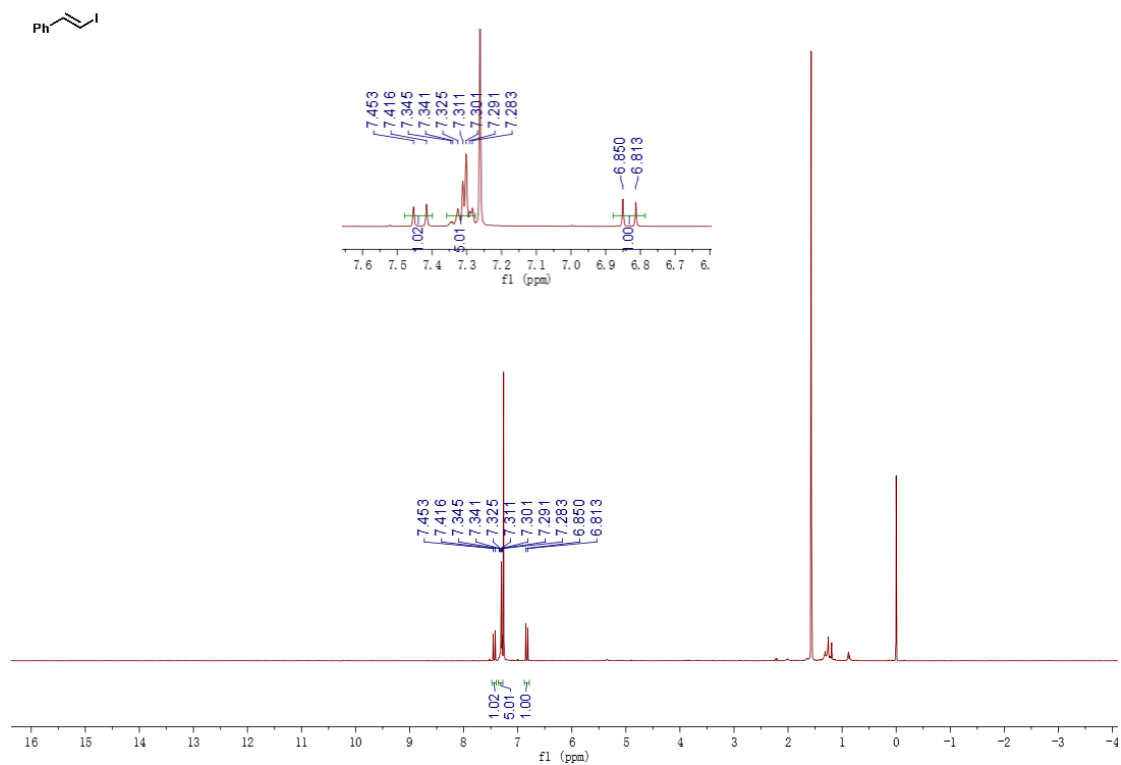

**Figure S86.** <sup>1</sup>H NMR (400 MHz, CDCl<sub>3</sub>) spectrum of compound **3b**.

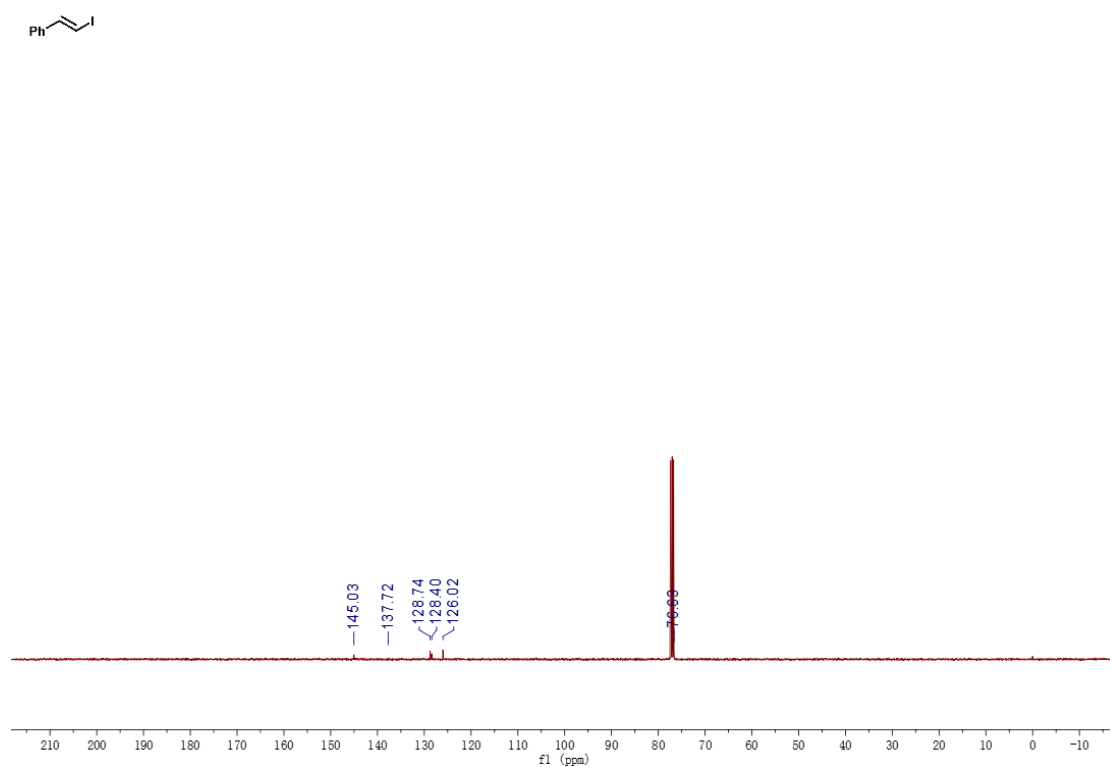

**Figure S87.** <sup>13</sup>C NMR (100 MHz, CDCl<sub>3</sub>) spectrum of compound **3b**.

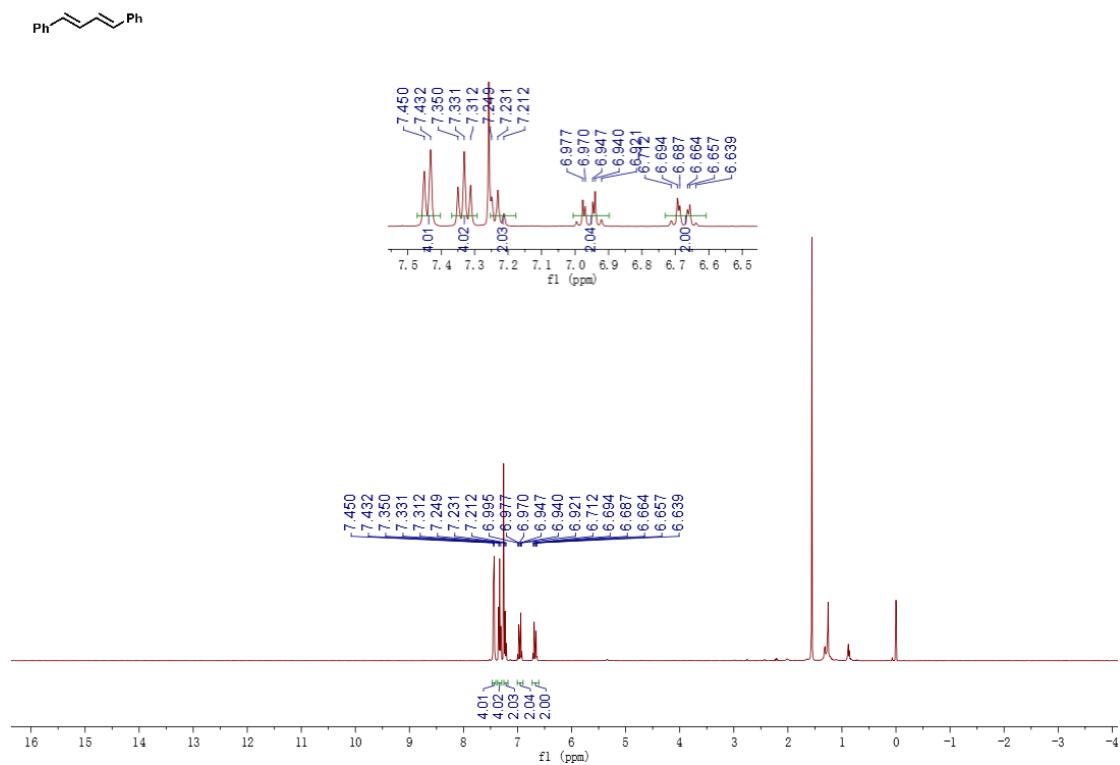

**Figure S88.** <sup>1</sup>H NMR (400 MHz, CDCl<sub>3</sub>) spectrum of compound **3c**.

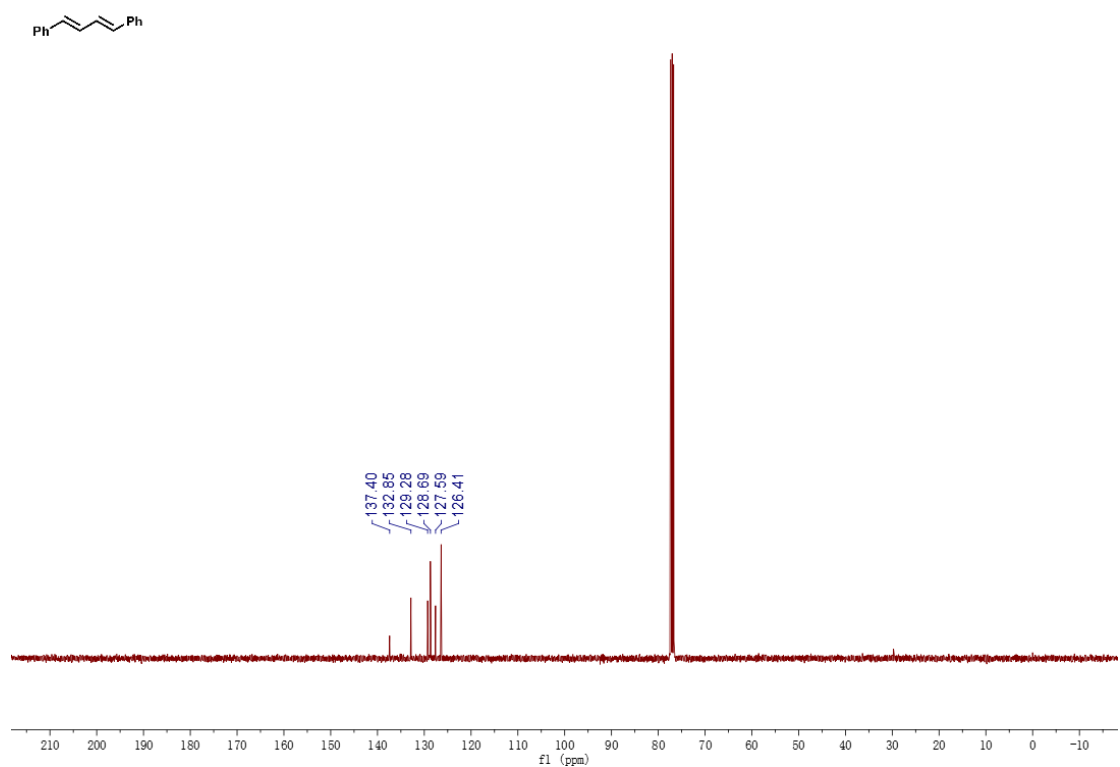

**Figure S89.** <sup>13</sup>C NMR (100 MHz, CDCl<sub>3</sub>) spectrum of compound **3c**.

### 13. Control Experiment

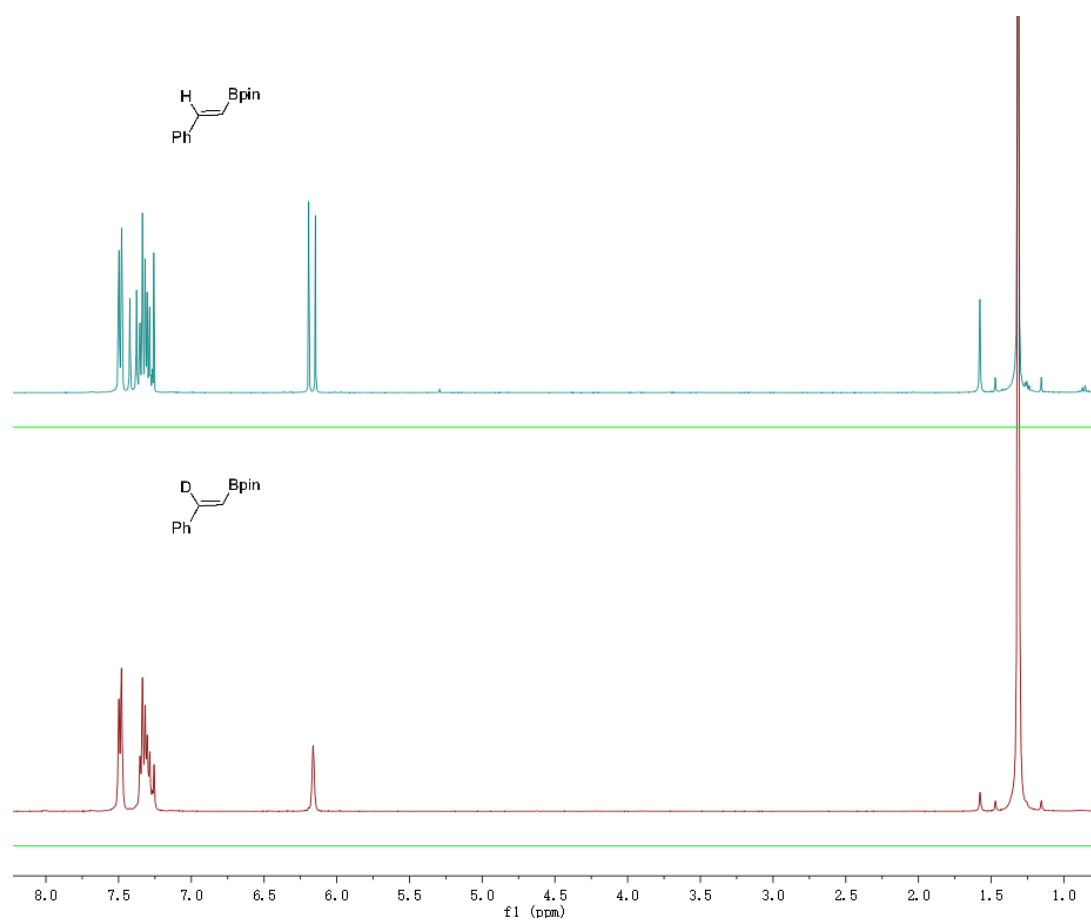

**Figure S90. Deuteride Experiment**

## 14. Details for the IR Investigations

FT-IR experiment of solid **M**:

Taking 10 mg of solid **M** drug and 50 mg of dry potassium bromide for grinding to make them fully mixed, then taking a small amount of mixed sample for tableting, and finally conducting FT-IR experiment.

FT-IR experiment of **M** in solvent:

Stirring 10 mg of solid **M** and 0.5 ml of solvent ( $\text{CDCl}_3$ ,  $\text{CH}_2\text{Cl}_2$ , THF and  $\text{CH}_3\text{CN}$ ) to make them fully mixed, taking a small amount of dry potassium bromide for tableting, then adding a drop of mixed solution on the potassium bromide tablet, and finally conducting FT-IR experiment.

## 12. X-Ray Data for M

1. CCDC 2171688 (M) contains the supplementary crystallographic data for this paper. The data can be obtained free of charge from The Cambridge Crystallographic Data Centre via <https://www.ccdc.cam.ac.uk/>

### Crystal Data

|                                         |                                                                                                                                                                         |
|-----------------------------------------|-------------------------------------------------------------------------------------------------------------------------------------------------------------------------|
| Identification code                     | 20220506_ts3_0m_5                                                                                                                                                       |
| Empirical formula                       | C27 H39 B2 N3 O4                                                                                                                                                        |
| Formula weight                          | 491.23                                                                                                                                                                  |
| Temperature                             | 173.0 K                                                                                                                                                                 |
| Wavelength                              | 1.54178 Å                                                                                                                                                               |
| Crystal system                          | Triclinic                                                                                                                                                               |
| Space group                             | P-1                                                                                                                                                                     |
| Unit cell dimensions                    | $a = 11.5388(5) \text{ Å}$ $\alpha = 88.955(2)^\circ$<br>$b = 15.2170(7) \text{ Å}$ $\beta = 88.529(2)^\circ$<br>$c = 31.3898(14) \text{ Å}$ $\gamma = 76.813(3)^\circ$ |
| Volume                                  | $5364.1(4) \text{ Å}^3$                                                                                                                                                 |
| Z                                       | 8                                                                                                                                                                       |
| Density (calculated)                    | $1.217 \text{ Mg/m}^3$                                                                                                                                                  |
| Absorption coefficient                  | $0.637 \text{ mm}^{-1}$                                                                                                                                                 |
| F(000)                                  | 2112                                                                                                                                                                    |
| Crystal size                            | $0.28 \times 0.22 \times 0.18 \text{ mm}^3$                                                                                                                             |
| Theta range for data collection         | $2.816$ to $72.493^\circ$ .                                                                                                                                             |
| Index ranges                            | $-14 \leq h \leq 14$ , $-18 \leq k \leq 18$ , $0 \leq l \leq 38$                                                                                                        |
| Reflections collected                   | 21455                                                                                                                                                                   |
| Independent reflections                 | 21455 [ $R(\text{int}) = 0.0851$ ]                                                                                                                                      |
| Completeness to $\theta = 67.679^\circ$ | 99.2 %                                                                                                                                                                  |
| Absorption correction                   | Semi-empirical from equivalents                                                                                                                                         |
| Max. and min. transmission              | 0.7536 and 0.5436                                                                                                                                                       |
| Refinement method                       | Full-matrix least-squares on $F^2$                                                                                                                                      |
| Data / restraints / parameters          | 21455 / 70 / 1355                                                                                                                                                       |
| Goodness-of-fit on $F^2$                | 1.101                                                                                                                                                                   |
| Final R indices [ $I > 2\sigma(I)$ ]    | $R1 = 0.0966$ , $wR2 = 0.2478$                                                                                                                                          |
| R indices (all data)                    | $R1 = 0.1375$ , $wR2 = 0.2946$                                                                                                                                          |
| Extinction coefficient                  | $0.0026(2)$                                                                                                                                                             |
| Largest diff. peak and hole             | $0.460$ and $-0.342 \text{ e.Å}^{-3}$                                                                                                                                   |

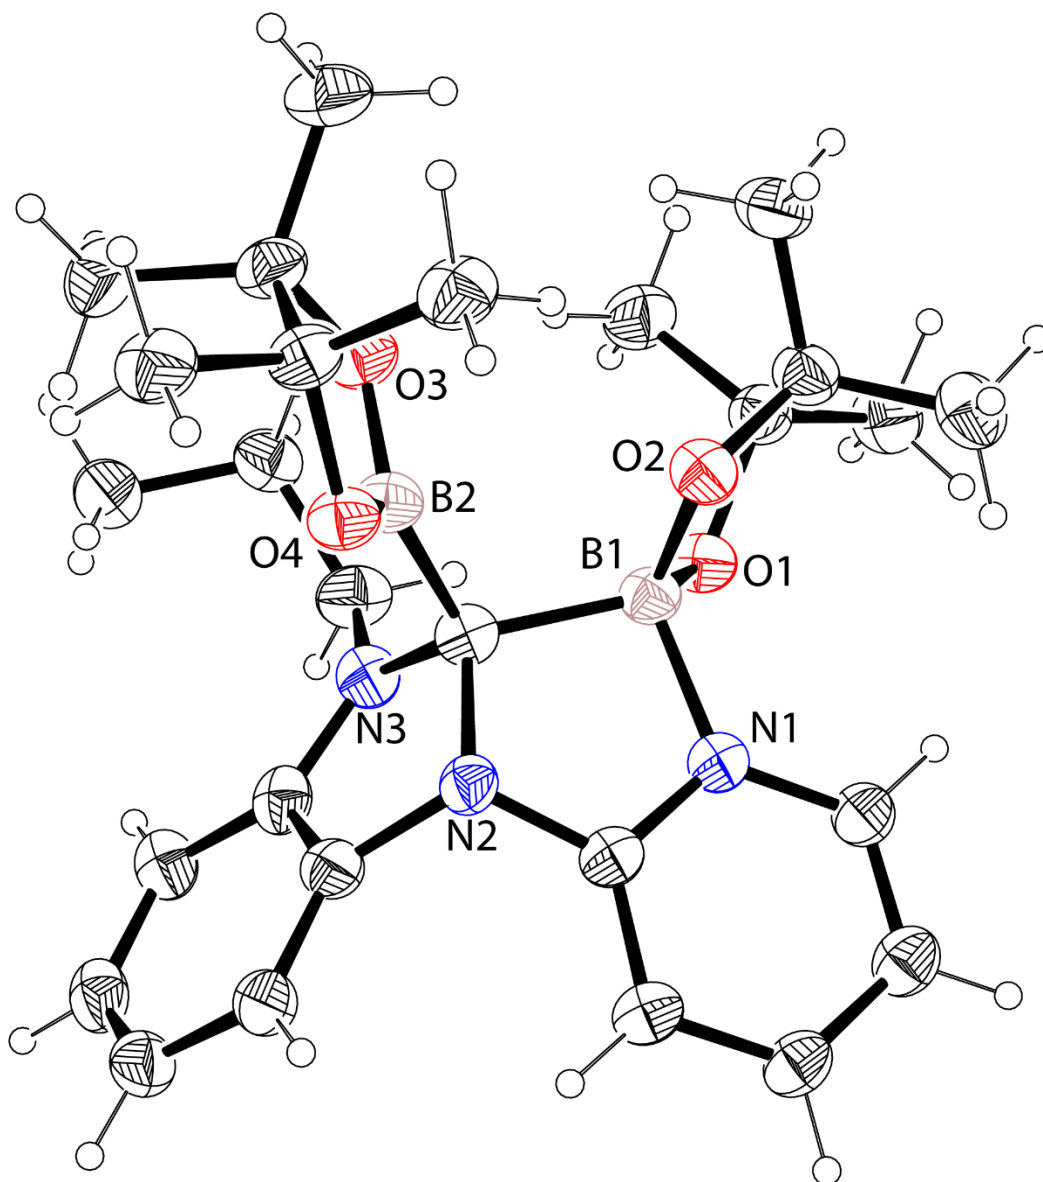

ORTEP of **M** (at 30% level)

**Figure S91.** X-Ray Data and structure of **M**.

## 16. HRMS Spectra for diboration product

HRMS (ESI) calcd for  $C_{20}H_{30}B_2O_4K$   $[M + K]^+$  395.1967, found 395.1974.

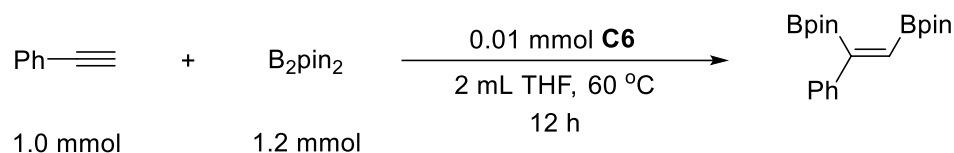

### Elemental Composition Report

Page 1

#### Single Mass Analysis

Tolerance = 20.0 PPM / DBE: min = -1.5, max = 50.0

Element prediction: Off

Number of isotope peaks used for i-FIT = 3

Monoisotopic Mass, Even Electron Ions

103 formula(e) evaluated with 1 results within limits (up to 50 best isotopic matches for each mass)

Elements Used:

C: 20-20 H: 1-50 B: 2-2 N: 0-8 O: 0-11 K: 1-1

12

221118-11-TS-1- 55 (0.321)

1: TOF MS ES+  
7.15e+002

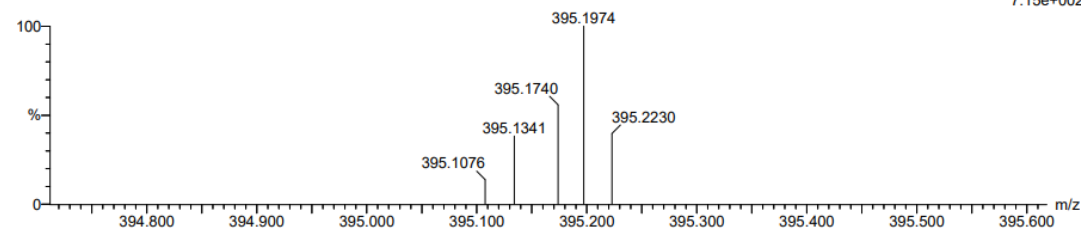

Minimum: -1.5  
Maximum: 5.0 20.0 50.0

| Mass     | Calc. Mass | mDa | PPM | DBE | i-FIT | Norm | Conf(%) | Formula                                                         |
|----------|------------|-----|-----|-----|-------|------|---------|-----------------------------------------------------------------|
| 395.1974 | 395.1967   | 0.7 | 1.8 | 6.5 | 18.7  | n/a  | n/a     | C <sub>20</sub> H <sub>30</sub> B <sub>2</sub> O <sub>4</sub> K |

Figure S92. HRMS Spectra for diboration product.

## 17. DFT Computational Results

Table S3. Sum of total energies (E) and thermal free energy corrections ( $G_{\text{correct}}$ , a.u.) of all the calculated stationary points as well as imaginary frequency (IF,  $\text{cm}^{-1}$ ) of transition states

| Species                             | E            | $E_{\text{correct}}$ | IF      |
|-------------------------------------|--------------|----------------------|---------|
| <b>NHC</b>                          | -728.245361  | 0.367626             | -       |
| <b>B<sub>2</sub>Pin<sub>2</sub></b> | -821.860249  | 0.286308             | -       |
| <b>1a</b>                           | -308.157359  | 0.11065              | -       |
| <b>H<sub>2</sub>O</b>               | -76.369683   | 0.021624             | -       |
| <b>HO-Bpin</b>                      | -486.773098  | 0.198503             | -       |
| <b>1</b>                            | -1550.140622 | 0.655442             | -       |
| <b>2-ts</b>                         | -1550.115327 | 0.653804             | -448.02 |
| <b>3</b>                            | -1550.155145 | 0.655687             | -       |
| <b>4-ts</b>                         | -1858.262086 | 0.766142             | -541.78 |
| <b>5</b>                            | -1858.389    | 0.772452             | -       |
| <b>6-ts</b>                         | -1858.358588 | 0.771297             | -119.46 |
| <b>7</b>                            | -1858.365214 | 0.770296             | -       |
| <b>8-ts</b>                         | -1550.750784 | 0.654102             | -183.22 |
| <b>9</b>                            | -1550.771928 | 0.65499              | -       |
| <b>10-ts</b>                        | -1550.750784 | 0.654943             | -113.24 |
| <b>11</b>                           | -1550.771928 | 0.657051             | -       |
| <b>12</b>                           | -1130.501723 | 0.480201             | -       |
| <b>13-ts</b>                        | -1130.501723 | 0.480207             | -153.27 |
| <b>14</b>                           | -1130.535811 | 0.481954             | -       |
| <b>15-ts</b>                        | -1130.502010 | 0.480745             | -241.02 |
| <b>16</b>                           | -1130.589001 | 0.482677             | -       |
| <b>2a</b>                           | -719.745824  | 0.308615             | -       |

### Cartesian coordinates

#### NHC

|   |             |             |             |
|---|-------------|-------------|-------------|
| C | 0.21207600  | -1.37257000 | -0.45043900 |
| C | -4.08868100 | -1.19084600 | -0.69189100 |
| H | -4.67832400 | -1.83343900 | -1.33749800 |
| C | -4.71321700 | -0.42910800 | 0.29464000  |
| H | -5.78954900 | -0.47788700 | 0.42104200  |
| C | -3.94907600 | 0.39166900  | 1.12062300  |
| H | -4.42586700 | 0.97748400  | 1.89953900  |
| C | -2.56640300 | 0.45435300  | 0.96561700  |

|                                 |             |             |             |
|---------------------------------|-------------|-------------|-------------|
| H                               | -1.96387300 | 1.06536000  | 1.62962100  |
| C                               | -1.95177300 | -0.29849400 | -0.03451500 |
| C                               | 0.22942400  | 0.91924900  | -0.17677100 |
| C                               | 1.54488800  | 0.49654000  | -0.39943600 |
| C                               | 2.60324400  | 1.40225400  | -0.45040900 |
| H                               | 3.62425600  | 1.07473900  | -0.61436800 |
| C                               | 2.29503600  | 2.74790400  | -0.28728300 |
| H                               | 3.09218000  | 3.48280900  | -0.32153900 |
| C                               | 0.97316500  | 3.17495800  | -0.08807600 |
| H                               | 0.76809300  | 4.23421300  | 0.02359700  |
| C                               | -0.08180700 | 2.27086600  | -0.03198100 |
| H                               | -1.10238300 | 2.60697700  | 0.10997100  |
| C                               | 2.62755800  | -1.75788800 | -0.77123300 |
| H                               | 3.41869600  | -1.16850000 | -1.24528900 |
| H                               | 2.31716900  | -2.53095900 | -1.47663300 |
| C                               | 3.12285200  | -2.38902300 | 0.52743500  |
| H                               | 2.30262400  | -2.98074500 | 0.94898500  |
| H                               | 3.92862300  | -3.08712800 | 0.27675700  |
| C                               | 3.61197600  | -1.36622200 | 1.54849100  |
| H                               | 2.81090000  | -0.67619600 | 1.82999400  |
| H                               | 4.44041100  | -0.77424400 | 1.14551600  |
| H                               | 3.96306500  | -1.85984200 | 2.45783800  |
| N                               | -0.54091400 | -0.24767100 | -0.20790900 |
| N                               | 1.47614100  | -0.88507800 | -0.56055300 |
| C                               | -2.71043000 | -1.12366900 | -0.86462800 |
| H                               | -2.20560100 | -1.70323600 | -1.62916000 |
| B <sub>2</sub> Pin <sub>2</sub> |             |             |             |
| B                               | 0.85255800  | -0.00021400 | 0.00023400  |
| B                               | -0.85254900 | -0.00026400 | 0.00007000  |

|   |             |             |             |
|---|-------------|-------------|-------------|
| C | 2.98923600  | -0.72472100 | -0.28922800 |
| C | 3.91139500  | -1.69731000 | 0.42639800  |
| H | 3.64571200  | -1.79792700 | 1.47990800  |
| H | 4.94928800  | -1.35799400 | 0.35560100  |
| H | 3.84046300  | -2.68135900 | -0.04390100 |
| C | 3.23747600  | -0.76417300 | -1.79526100 |
| H | 3.03033500  | -1.77279400 | -2.16098700 |
| H | 4.27471400  | -0.51365400 | -2.03240500 |
| H | 2.57856900  | -0.06519500 | -2.31866200 |
| C | 2.98913200  | 0.72478200  | 0.28914200  |
| C | 3.23781400  | 0.76408800  | 1.79509500  |
| H | 3.03078000  | 1.77263000  | 2.16108800  |
| H | 4.27512400  | 0.51354400  | 2.03190500  |
| H | 2.57908800  | 0.06497900  | 2.31856000  |
| C | 3.91089300  | 1.69765100  | -0.42662300 |
| H | 3.64530200  | 1.79792600  | -1.48017600 |
| H | 4.94894100  | 1.35885200  | -0.35561400 |
| H | 3.83939600  | 2.68176300  | 0.04346300  |
| C | -2.98908600 | 0.72477400  | -0.28923200 |
| C | -3.91082700 | 1.69766100  | 0.42654500  |
| H | -3.64499700 | 1.79815400  | 1.48002700  |
| H | -4.94884700 | 1.35871200  | 0.35585300  |
| H | -3.83960100 | 2.68170700  | -0.04371400 |
| C | -3.23773600 | 0.76407200  | -1.79518200 |
| H | -3.03051700 | 1.77260200  | -2.16112400 |
| H | -4.27508100 | 0.51369900  | -2.03199800 |
| H | -2.57910100 | 0.06489000  | -2.31866400 |
| C | -2.98925400 | -0.72472300 | 0.28921500  |
| C | -3.23767700 | -0.76401900 | 1.79520200  |
| H | -3.03071100 | -1.77261700 | 2.16109400  |

|   |             |             |             |
|---|-------------|-------------|-------------|
| H | -4.27491400 | -0.51335200 | 2.03220500  |
| H | -2.57875200 | -0.06505100 | 2.31860800  |
| C | -3.91140000 | -1.69730600 | -0.42644100 |
| H | -3.64586600 | -1.79770300 | -1.48000300 |
| H | -4.94931600 | -1.35811200 | -0.35543600 |
| H | -3.84028200 | -2.68142300 | 0.04368600  |
| O | 1.61400900  | -1.13833100 | -0.08207300 |
| O | 1.61370500  | 1.13810900  | 0.08244800  |
| O | -1.61368000 | 1.13803600  | -0.08247200 |
| O | -1.61398100 | -1.13838200 | 0.08227300  |

1a

|   |             |             |             |
|---|-------------|-------------|-------------|
| C | -1.50994600 | -1.20710600 | -0.00000500 |
| C | -0.11962300 | -1.21159200 | 0.00000700  |
| C | 0.58572400  | -0.00002500 | 0.00001000  |
| C | -0.11959700 | 1.21157800  | 0.00000600  |
| C | -1.50990400 | 1.20713300  | -0.00000400 |
| C | -2.20699300 | 0.00001600  | -0.00001300 |
| H | -2.05065300 | -2.14774000 | -0.00000900 |
| H | 0.42968200  | -2.14715600 | 0.00001200  |
| H | 0.42975900  | 2.14711200  | 0.00001100  |
| H | -2.05060500 | 2.14777100  | -0.00000800 |
| H | -3.29201700 | 0.00004400  | -0.00002300 |
| C | 2.02269500  | -0.00002000 | 0.00002900  |
| C | 3.23025700  | 0.00000500  | 0.00001100  |
| H | 4.29815000  | 0.00003400  | -0.00022600 |

H<sub>2</sub>O

|   |            |             |            |
|---|------------|-------------|------------|
| O | 0.00000000 | 0.11903100  | 0.00000000 |
| H | 0.75742700 | -0.47612400 | 0.00000000 |

|         |             |             |             |
|---------|-------------|-------------|-------------|
| H       | -0.75742700 | -0.47612400 | 0.00000000  |
| HO-Bpin |             |             |             |
| B       | 1.58581800  | -0.05265000 | -0.01253400 |
| C       | -0.55171000 | -0.77132100 | -0.05198000 |
| C       | -1.51985200 | -1.30989600 | -1.09147500 |
| H       | -1.26748100 | -0.95399100 | -2.09172000 |
| H       | -2.54270300 | -1.00197700 | -0.85449000 |
| H       | -1.48409900 | -2.40232900 | -1.09308500 |
| C       | -0.78364500 | -1.44472900 | 1.29826800  |
| H       | -0.59691100 | -2.51630300 | 1.19435900  |
| H       | -1.81094400 | -1.30203300 | 1.64286400  |
| H       | -0.10151600 | -1.04623200 | 2.05525700  |
| C       | -0.50809700 | 0.78944700  | 0.05399400  |
| C       | -0.71604800 | 1.47579700  | -1.29331200 |
| H       | -0.46854200 | 2.53526000  | -1.19159400 |
| H       | -1.75351400 | 1.39141300  | -1.62661100 |
| H       | -0.06590400 | 1.04003200  | -2.05792900 |
| C       | -1.43121000 | 1.38158600  | 1.10493000  |
| H       | -1.18621200 | 1.01333200  | 2.10253500  |
| H       | -2.47228800 | 1.12986100  | 0.88132200  |
| H       | -1.33604300 | 2.47044700  | 1.10417600  |
| O       | 0.80039100  | -1.08746600 | -0.45880200 |
| O       | 0.86637600  | 1.02763300  | 0.44401800  |
| O       | 2.94160200  | -0.12900200 | -0.03338500 |
| H       | 3.35348200  | 0.69114500  | 0.26038200  |
| 1       |             |             |             |
| C       | -0.90342700 | -0.14228200 | -0.28345800 |
| C       | 0.16166400  | 1.05940200  | 3.88287800  |

|   |             |             |             |
|---|-------------|-------------|-------------|
| H | 1.07037900  | 0.82978700  | 4.42949200  |
| C | -0.69648800 | 2.05944300  | 4.34020200  |
| H | -0.45455800 | 2.60904500  | 5.24376400  |
| C | -1.86436500 | 2.35356900  | 3.64020500  |
| H | -2.53279300 | 3.13079300  | 3.99473400  |
| C | -2.17688800 | 1.65282100  | 2.47715400  |
| H | -3.07600600 | 1.87624400  | 1.91090400  |
| C | -1.30713500 | 0.66371700  | 2.03210900  |
| C | -2.71778800 | -0.95921500 | 0.78126200  |
| C | -2.62385400 | -1.58340000 | -0.46392200 |
| C | -3.54190100 | -2.55570000 | -0.85930200 |
| H | -3.47226600 | -3.05092300 | -1.82104300 |
| C | -4.55148100 | -2.86723400 | 0.04155300  |
| H | -5.28637100 | -3.61794700 | -0.22775600 |
| C | -4.64359400 | -2.23544100 | 1.29390000  |
| H | -5.44802500 | -2.51012600 | 1.96721300  |
| C | -3.72674000 | -1.27099800 | 1.68974400  |
| H | -3.78633400 | -0.78432100 | 2.65688400  |
| C | -0.98265300 | -1.49296100 | -2.38486100 |
| H | -1.24986600 | -2.55003500 | -2.47736200 |
| H | 0.10634000  | -1.42128300 | -2.33812600 |
| C | -1.50936200 | -0.68382500 | -3.56769200 |
| H | -1.05565100 | 0.30780300  | -3.50991800 |
| H | -1.12663700 | -1.16490400 | -4.47458900 |
| C | -3.02939600 | -0.57889500 | -3.63522400 |
| H | -3.43428900 | -0.09395700 | -2.74096900 |
| H | -3.50013400 | -1.56244000 | -3.72963500 |
| H | -3.33086400 | 0.01779100  | -4.49979200 |
| N | -1.63666000 | -0.08031000 | 0.85278100  |
| N | -1.49575500 | -1.05099300 | -1.08340700 |

|   |             |             |             |
|---|-------------|-------------|-------------|
| B | 0.54472900  | 0.61881300  | -0.61846100 |
| B | 1.78302600  | -0.55338300 | -0.28340700 |
| C | 0.92587100  | 2.92788200  | -0.61014000 |
| C | 0.35516600  | 4.18579500  | 0.03346300  |
| H | -0.69492600 | 4.04598100  | 0.29939900  |
| H | 0.43875400  | 5.04599800  | -0.63945800 |
| H | 0.90961800  | 4.41474400  | 0.94873400  |
| C | 2.44159300  | 3.06587500  | -0.78317100 |
| H | 2.89896900  | 3.15315200  | 0.20718400  |
| H | 2.71207300  | 3.95131900  | -1.36710900 |
| H | 2.84617400  | 2.17353700  | -1.26914600 |
| C | 0.23223700  | 2.50560500  | -1.94038900 |
| C | -1.28717900 | 2.70332500  | -1.85982600 |
| H | -1.76826300 | 2.19398100  | -2.70028200 |
| H | -1.55668700 | 3.76305200  | -1.90598300 |
| H | -1.68669900 | 2.28958200  | -0.92765400 |
| C | 0.77563100  | 3.18357900  | -3.19063200 |
| H | 1.82734000  | 2.93216200  | -3.34277100 |
| H | 0.67971900  | 4.27242100  | -3.12089800 |
| H | 0.21270200  | 2.84900500  | -4.06797500 |
| C | 2.81427900  | -2.45149000 | 0.49786100  |
| C | 2.99317200  | -3.11367300 | 1.85453200  |
| H | 2.92450800  | -2.38445700 | 2.66412000  |
| H | 3.96590700  | -3.61222500 | 1.91196900  |
| H | 2.21480600  | -3.86703500 | 2.00183700  |
| C | 2.67487700  | -3.50730600 | -0.59711000 |
| H | 1.78112900  | -4.10434700 | -0.39842600 |
| H | 3.54094400  | -4.17424600 | -0.62228100 |
| H | 2.56425200  | -3.03665000 | -1.57869700 |
| C | 3.87647500  | -1.36384700 | 0.15597200  |

|   |             |             |             |
|---|-------------|-------------|-------------|
| C | 4.34873600  | -0.59460800 | 1.38899000  |
| H | 4.91718400  | 0.28000600  | 1.06271500  |
| H | 4.99002900  | -1.20948700 | 2.02598800  |
| H | 3.49410400  | -0.24760200 | 1.97913700  |
| C | 5.06568700  | -1.86307400 | -0.64834800 |
| H | 4.75170500  | -2.27028100 | -1.61118800 |
| H | 5.60222100  | -2.64111200 | -0.09600500 |
| H | 5.75799700  | -1.03730500 | -0.83263300 |
| O | 0.66428500  | 1.81899600  | 0.23726300  |
| O | 0.54139100  | 1.11729700  | -2.00437300 |
| O | 1.58946800  | -1.68422400 | 0.50039300  |
| O | 3.11333500  | -0.43412700 | -0.64535300 |
| C | -0.14289500 | 0.34969300  | 2.72648600  |
| H | 0.51237500  | -0.42781800 | 2.34249900  |

2-ts

|   |             |             |             |
|---|-------------|-------------|-------------|
| C | 0.10916600  | 0.50338800  | 0.76139200  |
| C | 0.59806400  | 3.24297300  | -3.19522800 |
| H | 1.06926900  | 3.29501100  | -4.17133300 |
| C | -0.46161800 | 4.09057400  | -2.88328200 |
| H | -0.81714900 | 4.81032800  | -3.61308100 |
| C | -1.06830600 | 4.00749500  | -1.62979800 |
| H | -1.89556800 | 4.66419800  | -1.38056600 |
| C | -0.61174800 | 3.09449100  | -0.68738600 |
| H | -1.07338600 | 3.02224800  | 0.29187600  |
| C | 0.44896700  | 2.24265100  | -1.00568900 |
| C | 2.25797700  | 1.19540200  | 0.37427900  |
| C | 2.24173500  | 0.42071100  | 1.55057700  |
| C | 3.41550300  | 0.13731000  | 2.23392900  |
| H | 3.41084800  | -0.44953900 | 3.14578500  |

|   |             |             |             |
|---|-------------|-------------|-------------|
| C | 4.61157800  | 0.65072700  | 1.71653800  |
| H | 5.54267400  | 0.43733400  | 2.23068000  |
| C | 4.62313700  | 1.43213900  | 0.56462100  |
| H | 5.56136600  | 1.82647300  | 0.18971500  |
| C | 3.43822000  | 1.72204400  | -0.12536700 |
| H | 3.44758500  | 2.34255500  | -1.01364100 |
| C | 0.46031600  | -0.73252000 | 2.92120800  |
| H | 1.34233300  | -1.21686000 | 3.35083700  |
| H | -0.17410400 | -1.51612600 | 2.49868300  |
| C | -0.29184500 | 0.05358500  | 3.99147200  |
| H | -1.15389900 | 0.53525200  | 3.51673800  |
| H | -0.68972400 | -0.65977300 | 4.72207400  |
| C | 0.59125500  | 1.08702100  | 4.68344000  |
| H | 0.99583800  | 1.79912800  | 3.95735100  |
| H | 1.43643500  | 0.60529600  | 5.18657100  |
| H | 0.03117300  | 1.65173700  | 5.43291000  |
| N | 0.92623500  | 1.32704300  | -0.04000400 |
| N | 0.91837300  | 0.12298000  | 1.83922200  |
| B | -1.32253500 | 0.06751600  | 0.49580300  |
| B | 0.03966500  | -1.12317800 | -0.36500500 |
| C | -3.39658000 | -0.03932700 | -0.42954200 |
| C | -4.47989000 | 0.90961900  | -0.91838100 |
| H | -4.42354200 | 1.86859000  | -0.39952800 |
| H | -5.47324700 | 0.47813700  | -0.76040300 |
| H | -4.35201900 | 1.09045900  | -1.98926900 |
| C | -3.33583600 | -1.28118500 | -1.31849800 |
| H | -3.02460700 | -0.98260000 | -2.32268800 |
| H | -4.30954800 | -1.77481500 | -1.38270000 |
| H | -2.60529000 | -1.99977500 | -0.93487200 |
| C | -3.47897400 | -0.40086200 | 1.08607500  |

|   |             |             |             |
|---|-------------|-------------|-------------|
| C | -3.91527000 | 0.79004000  | 1.93925700  |
| H | -3.75129000 | 0.54753400  | 2.99263700  |
| H | -4.97424600 | 1.02312500  | 1.79678300  |
| H | -3.32362800 | 1.67718100  | 1.69100300  |
| C | -4.32668300 | -1.62239800 | 1.40357800  |
| H | -3.93195100 | -2.51463100 | 0.91396100  |
| H | -5.35999500 | -1.46813300 | 1.07688600  |
| H | -4.33270900 | -1.79577600 | 2.48319100  |
| C | 1.08682500  | -3.06112100 | -0.90402500 |
| C | 2.45876600  | -3.65500200 | -0.63340300 |
| H | 3.19884300  | -2.87429600 | -0.44853500 |
| H | 2.78598700  | -4.26059200 | -1.48403400 |
| H | 2.41017100  | -4.30071600 | 0.24700300  |
| C | 0.02043200  | -4.15174200 | -0.91034800 |
| H | 0.00183700  | -4.63377100 | 0.07004800  |
| H | 0.23325100  | -4.91033100 | -1.66797600 |
| H | -0.97016100 | -3.73055500 | -1.10595900 |
| C | 1.01204300  | -2.12219700 | -2.15160000 |
| C | 2.31853400  | -1.37875600 | -2.41418400 |
| H | 2.14419900  | -0.62318500 | -3.18431300 |
| H | 3.09747600  | -2.05874100 | -2.76948400 |
| H | 2.67282800  | -0.87663000 | -1.50752700 |
| C | 0.51022500  | -2.78946200 | -3.42034700 |
| H | -0.49688300 | -3.18869800 | -3.28868800 |
| H | 1.17837800  | -3.60605200 | -3.71102200 |
| H | 0.48918600  | -2.05944500 | -4.23333800 |
| O | -2.13266500 | 0.63836300  | -0.50578400 |
| O | -2.10708100 | -0.68720300 | 1.40922200  |
| O | 0.75314500  | -2.15350000 | 0.18113700  |
| O | 0.03934900  | -1.12327500 | -1.73177500 |

|   |             |             |             |
|---|-------------|-------------|-------------|
| C | 1.04938000  | 2.31058700  | -2.26375100 |
| H | 1.85112500  | 1.62240300  | -2.50991400 |
| 3 |             |             |             |
| C | 0.23400400  | 0.40965400  | 0.01847500  |
| C | -3.58448800 | -0.65202600 | 2.64453100  |
| H | -4.63083700 | -0.38686400 | 2.76071500  |
| C | -3.12894400 | -1.89962700 | 3.06795800  |
| H | -3.81334000 | -2.60610300 | 3.52552600  |
| C | -1.78767800 | -2.23052100 | 2.88975800  |
| H | -1.41785200 | -3.19936900 | 3.21089400  |
| C | -0.90538100 | -1.32012100 | 2.31581000  |
| H | 0.14694600  | -1.56033900 | 2.21236500  |
| C | -1.35739300 | -0.06201000 | 1.89898900  |
| C | -0.66083900 | 2.21789400  | 1.24790200  |
| C | -0.03967800 | 2.74249500  | 0.10078000  |
| C | -0.09270000 | 4.10011300  | -0.17403800 |
| H | 0.38029400  | 4.50626000  | -1.06144500 |
| C | -0.76322400 | 4.94113600  | 0.73020100  |
| H | -0.81317800 | 6.00541000  | 0.52468700  |
| C | -1.34781600 | 4.42763600  | 1.87778900  |
| H | -1.85234100 | 5.08833300  | 2.57483000  |
| C | -1.29754300 | 3.05005000  | 2.15285500  |
| H | -1.75758500 | 2.64670200  | 3.04849800  |
| C | 0.79228300  | 1.81563000  | -2.04094300 |
| H | 0.16947900  | 2.63725800  | -2.42126800 |
| H | 0.41569500  | 0.89691000  | -2.50908800 |
| C | 2.24924400  | 2.01899200  | -2.45092300 |
| H | 2.81229100  | 1.13917700  | -2.12900200 |
| H | 2.29586700  | 2.04933300  | -3.54576000 |

|   |             |             |             |
|---|-------------|-------------|-------------|
| C | 2.86813700  | 3.28137000  | -1.86128900 |
| H | 2.75408900  | 3.29110100  | -0.77237200 |
| H | 2.38993700  | 4.18210300  | -2.26049200 |
| H | 3.93526200  | 3.34144400  | -2.09148600 |
| N | -0.43344400 | 0.83379100  | 1.30162900  |
| N | 0.60328700  | 1.72422300  | -0.59595900 |
| B | 1.58248900  | -0.39038800 | 0.25875700  |
| B | -0.85119500 | -0.37075800 | -0.86405600 |
| C | 3.22982300  | -1.56547700 | 1.27239000  |
| C | 4.34993800  | -1.26404400 | 2.25212000  |
| H | 4.66760600  | -0.22241400 | 2.18520700  |
| H | 5.21080100  | -1.90973200 | 2.05401700  |
| H | 4.00546900  | -1.45674900 | 3.27118300  |
| C | 2.64385000  | -2.95139400 | 1.53165700  |
| H | 2.24298600  | -2.98173100 | 2.54839900  |
| H | 3.40577200  | -3.72924200 | 1.43789600  |
| H | 1.83068900  | -3.16890500 | 0.83106600  |
| C | 3.58645200  | -1.33102700 | -0.23108300 |
| C | 4.57410800  | -0.18493200 | -0.43149600 |
| H | 4.67223300  | 0.02137100  | -1.50024600 |
| H | 5.56180300  | -0.44459400 | -0.04243300 |
| H | 4.22660100  | 0.72626800  | 0.06672500  |
| C | 4.05004900  | -2.57150800 | -0.97487100 |
| H | 3.28596800  | -3.35021100 | -0.96420100 |
| H | 4.96403100  | -2.96714700 | -0.52156400 |
| H | 4.26819600  | -2.31405600 | -2.01425200 |
| C | -2.08371900 | -2.06900000 | -1.70403400 |
| C | -1.90414000 | -3.10759700 | -2.79740500 |
| H | -1.21227900 | -2.76406100 | -3.56781700 |
| H | -2.86800600 | -3.33313300 | -3.26374000 |

|      |             |             |             |
|------|-------------|-------------|-------------|
| H    | -1.51039700 | -4.03034400 | -2.36414500 |
| C    | -2.86245400 | -2.65033500 | -0.52875300 |
| H    | -2.29693800 | -3.48646300 | -0.10928200 |
| H    | -3.84231200 | -3.01601800 | -0.84748500 |
| H    | -2.99849400 | -1.90257900 | 0.25836400  |
| C    | -2.65459300 | -0.69572300 | -2.19246400 |
| C    | -2.24685700 | -0.35285700 | -3.62262000 |
| H    | -2.48890900 | 0.69489600  | -3.81695100 |
| H    | -2.78103100 | -0.97466400 | -4.34583000 |
| H    | -1.17176200 | -0.49176300 | -3.77133600 |
| C    | -4.15411000 | -0.53333900 | -2.00936100 |
| H    | -4.43226200 | -0.60033000 | -0.95582600 |
| H    | -4.69176200 | -1.30523300 | -2.56819200 |
| H    | -4.46585400 | 0.44305800  | -2.38870900 |
| O    | 2.15184700  | -0.61482600 | 1.48176700  |
| O    | 2.31125000  | -0.90455200 | -0.78069900 |
| O    | -0.77704300 | -1.69469000 | -1.18550900 |
| O    | -1.97526600 | 0.25097800  | -1.32579400 |
| C    | -2.71368400 | 0.25738500  | 2.05089400  |
| H    | -3.08442400 | 1.21185600  | 1.69424900  |
| 4-ts |             |             |             |
| C    | -0.71293200 | -0.03072300 | 0.50924800  |
| B    | -1.11705500 | 1.46522400  | 0.26354100  |
| N    | 0.05988800  | -0.36141800 | 1.63774600  |
| C    | 2.15374100  | 1.44844500  | -1.31939200 |
| O    | -0.81025400 | 2.47150200  | 1.13888200  |
| O    | -1.85318600 | 1.87991000  | -0.81112500 |
| B    | 0.59703900  | -0.52198300 | -1.12519500 |
| N    | -1.74312000 | -1.00982600 | 0.49272300  |

|   |             |             |             |
|---|-------------|-------------|-------------|
| C | 1.20270200  | 0.38339000  | 2.14573800  |
| C | -0.39435700 | -1.52095100 | 2.21949000  |
| C | 3.45919100  | 1.47149700  | -0.83065100 |
| C | 0.94275400  | 1.07782600  | -1.49647400 |
| C | -1.24352600 | 3.71648200  | 0.52453000  |
| C | -2.31549700 | 3.21961500  | -0.50311200 |
| O | 1.58269600  | -1.33929200 | -0.56965900 |
| O | -0.05869800 | -1.20673900 | -2.16232000 |
| C | -1.53917400 | -1.92717100 | 1.51181000  |
| C | -3.00557500 | -0.85647900 | -0.15668500 |
| C | 2.53530000  | -0.37927600 | 2.11804300  |
| H | 1.27792400  | 1.30569200  | 1.56612700  |
| H | 0.96553800  | 0.67209000  | 3.18030700  |
| C | 0.05200400  | -2.24164000 | 3.32629100  |
| C | 4.49123700  | 0.74363500  | -1.48169500 |
| C | 3.80207700  | 2.23305800  | 0.31828300  |
| H | 0.14354000  | 1.56396700  | -2.05570200 |
| C | -0.01771200 | 4.34064700  | -0.13334600 |
| C | -1.78728800 | 4.62900300  | 1.61093400  |
| C | -3.70589700 | 3.06535600  | 0.10893100  |
| C | -2.38205400 | 4.02186900  | -1.79076200 |
| C | 1.51995000  | -2.63185700 | -1.19429400 |
| C | 0.77541200  | -2.32141200 | -2.53226600 |
| C | -2.24220400 | -3.07434500 | 1.85433900  |
| C | -4.15219000 | -0.74668100 | 0.63385100  |
| C | 3.47868100  | 0.16536700  | 3.18734500  |
| H | 2.35732600  | -1.44714000 | 2.28032800  |
| H | 2.97575900  | -0.29178800 | 1.12382200  |
| C | -0.66020700 | -3.39299800 | 3.67566500  |
| H | 0.91198300  | -1.91886400 | 3.90219800  |

|   |             |             |             |
|---|-------------|-------------|-------------|
| C | 5.78038400  | 0.74672500  | -0.97525900 |
| H | 4.25164400  | 0.17419700  | -2.37406500 |
| C | 5.10388400  | 2.24171800  | 0.79295900  |
| H | 3.02995100  | 2.81114700  | 0.81775800  |
| H | 0.74774200  | 4.49798600  | 0.63137000  |
| H | -0.26106000 | 5.30685900  | -0.58290300 |
| H | 0.39780800  | 3.68364700  | -0.90201200 |
| H | -0.97683500 | 4.92043600  | 2.28359200  |
| H | -2.56288600 | 4.13328900  | 2.19635400  |
| H | -2.20636100 | 5.53702800  | 1.16708800  |
| H | -4.34287100 | 2.52518700  | -0.59702900 |
| H | -4.15831300 | 4.03808400  | 0.31850500  |
| H | -3.66329300 | 2.48749700  | 1.03747200  |
| H | -3.14653500 | 3.59684700  | -2.44604500 |
| H | -1.42617900 | 4.00681400  | -2.31755600 |
| H | -2.65145200 | 5.06068900  | -1.57760800 |
| C | 0.72329100  | -3.56967200 | -0.29213500 |
| C | 2.94180600  | -3.14925000 | -1.36095100 |
| C | -0.10111600 | -3.44758900 | -3.05739200 |
| C | 1.71955500  | -1.83313300 | -3.63126900 |
| C | -1.78115400 | -3.80614200 | 2.95177000  |
| H | -3.11895000 | -3.37914600 | 1.29356700  |
| C | -5.39492300 | -0.58693000 | 0.02936300  |
| H | -4.06146600 | -0.78226800 | 1.71534900  |
| C | -4.34374900 | -0.63226500 | -2.14014700 |
| H | 3.59723400  | 1.24918000  | 3.08750800  |
| H | 4.47149300  | -0.28415900 | 3.10432300  |
| H | 3.09389600  | -0.03772100 | 4.19274100  |
| H | -0.33492100 | -3.97335400 | 4.53252300  |
| C | 6.10170100  | 1.49307900  | 0.16286100  |

|   |             |             |             |
|---|-------------|-------------|-------------|
| H | 6.54996500  | 0.16749300  | -1.47675900 |
| H | 5.34443100  | 2.83005100  | 1.67368700  |
| H | 1.13854100  | -3.53149500 | 0.71977000  |
| H | 0.76835900  | -4.60072700 | -0.65568500 |
| H | -0.32314300 | -3.26163400 | -0.24138600 |
| H | 3.37366000  | -3.34297600 | -0.37472900 |
| H | 3.57013700  | -2.41697900 | -1.87207500 |
| H | 2.95128300  | -4.08523000 | -1.92851600 |
| H | -0.89093100 | -3.69948500 | -2.34739100 |
| H | -0.56790800 | -3.14071700 | -3.99745100 |
| H | 0.49859300  | -4.34272300 | -3.25075500 |
| H | 1.12344100  | -1.45552700 | -4.46616000 |
| H | 2.36132400  | -2.63933300 | -3.99703500 |
| H | 2.34987000  | -1.01703700 | -3.26524800 |
| H | -2.30997600 | -4.70531900 | 3.24867800  |
| C | -5.49327400 | -0.52552600 | -1.35957400 |
| H | -6.28431000 | -0.50245600 | 0.64530900  |
| H | -4.41758200 | -0.58766600 | -3.22205800 |
| H | 7.11592900  | 1.49793500  | 0.54682000  |
| H | -6.46225000 | -0.39696000 | -1.83074300 |
| C | -3.09597600 | -0.80521500 | -1.54623800 |
| H | -2.19108800 | -0.89670900 | -2.13636800 |

5

|   |             |             |             |
|---|-------------|-------------|-------------|
| C | -0.08074100 | -0.85085600 | -0.60357100 |
| C | -0.12153100 | -3.14673700 | 3.59837900  |
| H | -0.09396100 | -4.14733300 | 4.01633700  |
| C | 0.14939700  | -2.04195200 | 4.40206100  |
| H | 0.38544700  | -2.18007800 | 5.45187800  |
| C | 0.11830200  | -0.75995100 | 3.85535300  |

|   |             |             |             |
|---|-------------|-------------|-------------|
| H | 0.33076000  | 0.10335600  | 4.47732000  |
| C | -0.19189400 | -0.57636400 | 2.51186600  |
| H | -0.21106500 | 0.41179200  | 2.06790800  |
| C | -0.45113400 | -1.68752000 | 1.71670900  |
| C | -1.96369700 | -2.02726100 | -0.21799100 |
| C | -1.94596700 | -1.65326000 | -1.56285700 |
| C | -2.99069800 | -1.98760900 | -2.42549900 |
| H | -2.99043900 | -1.68732600 | -3.46727700 |
| C | -4.04268500 | -2.71413400 | -1.88595100 |
| H | -4.87529000 | -2.99244500 | -2.52249700 |
| C | -4.05840600 | -3.09206900 | -0.53125100 |
| H | -4.90209000 | -3.65538200 | -0.14789500 |
| C | -3.02221600 | -2.75377600 | 0.32849100  |
| H | -3.03522100 | -3.03589000 | 1.37535700  |
| C | -0.30702200 | -0.48328900 | -3.07975600 |
| H | -0.89861100 | -1.02583100 | -3.82169900 |
| H | 0.73706800  | -0.76802600 | -3.17878000 |
| C | -0.47004500 | 1.02091200  | -3.25086700 |
| H | 0.03985300  | 1.51881300  | -2.41819500 |
| H | 0.05661800  | 1.30682100  | -4.16772200 |
| C | -1.93201700 | 1.44484200  | -3.32202700 |
| H | -2.45307900 | 1.14052000  | -2.40957400 |
| H | -2.43308200 | 0.98123900  | -4.17860200 |
| H | -2.02558200 | 2.52959400  | -3.42472200 |
| N | -0.79122500 | -1.52172600 | 0.33644300  |
| N | -0.76072100 | -0.95630600 | -1.76173500 |
| B | -1.22787500 | 2.14976400  | 0.32386400  |
| B | 1.43113700  | -0.14811700 | -0.37160600 |
| C | -3.35894500 | 2.90856300  | 0.64446800  |
| C | -4.12485400 | 3.49400500  | 1.82057400  |

|   |             |             |             |
|---|-------------|-------------|-------------|
| H | -3.70270100 | 3.17016300  | 2.77319100  |
| H | -5.17562000 | 3.19098600  | 1.77979500  |
| H | -4.08266400 | 4.58538900  | 1.77682800  |
| C | -3.82788400 | 3.54706300  | -0.66022600 |
| H | -3.62252300 | 4.61967900  | -0.62071100 |
| H | -4.90121900 | 3.40366200  | -0.81026800 |
| H | -3.29368500 | 3.12405000  | -1.51516100 |
| C | -3.34318100 | 1.34732800  | 0.59105700  |
| C | -3.37442200 | 0.70675600  | 1.97625400  |
| H | -3.15075800 | -0.35908400 | 1.87418800  |
| H | -4.35770500 | 0.81526100  | 2.44162300  |
| H | -2.62158400 | 1.15039500  | 2.63510700  |
| C | -4.41450700 | 0.73036600  | -0.29170400 |
| H | -4.33478400 | 1.06875800  | -1.32606400 |
| H | -5.40618000 | 1.00013100  | 0.08594500  |
| H | -4.32532400 | -0.35911900 | -0.27486900 |
| C | 3.27684800  | -1.11284200 | -1.50841600 |
| C | 3.35668300  | -2.00616000 | -2.74625100 |
| H | 2.41856400  | -2.53801700 | -2.92081500 |
| H | 4.16090900  | -2.74321600 | -2.64688000 |
| H | 3.56919400  | -1.39039700 | -3.62574200 |
| C | 4.55825500  | -0.27774300 | -1.43087200 |
| H | 4.59583800  | 0.37759500  | -2.30635500 |
| H | 5.44972800  | -0.91332300 | -1.43830600 |
| H | 4.57273800  | 0.34924600  | -0.53780000 |
| C | 2.96889400  | -1.88913500 | -0.18145900 |
| C | 2.14640800  | -3.16219100 | -0.42388500 |
| H | 1.79485000  | -3.54002900 | 0.54059200  |
| H | 2.74236800  | -3.94241200 | -0.90695400 |
| H | 1.27195700  | -2.96707600 | -1.05285500 |

|      |             |             |             |
|------|-------------|-------------|-------------|
| C    | 4.20598800  | -2.24598100 | 0.63547500  |
| H    | 4.74184400  | -1.34404000 | 0.94012500  |
| H    | 4.88456200  | -2.88641100 | 0.06228900  |
| H    | 3.90429400  | -2.78871100 | 1.53649700  |
| O    | -1.95839800 | 3.22269600  | 0.79195700  |
| O    | -2.03235200 | 1.07053800  | 0.03383800  |
| O    | 2.16349600  | -0.23420700 | -1.64451700 |
| O    | 2.19060200  | -0.96455500 | 0.56736400  |
| C    | 4.75360900  | 2.13798000  | 1.63456700  |
| C    | 3.48377000  | 1.60288600  | 1.43449200  |
| C    | 2.70968800  | 1.99439600  | 0.33403300  |
| C    | 3.23988900  | 2.93279600  | -0.55722300 |
| C    | 4.51704500  | 3.45692500  | -0.36713300 |
| C    | 5.27932000  | 3.06047800  | 0.72931600  |
| H    | 5.33816200  | 1.83108800  | 2.49704800  |
| H    | 3.08354600  | 0.86371500  | 2.12045500  |
| H    | 2.64537700  | 3.23831100  | -1.41429900 |
| H    | 4.91664400  | 4.17609900  | -1.07597300 |
| H    | 6.27325900  | 3.46988400  | 0.88053500  |
| C    | 1.34473700  | 1.42202200  | 0.12000200  |
| C    | 0.32055900  | 2.29154700  | 0.28719100  |
| H    | 0.61420800  | 3.31139300  | 0.56076900  |
| C    | -0.42062600 | -2.97399000 | 2.24922900  |
| H    | -0.61559800 | -3.82785200 | 1.60735300  |
| 6-ts |             |             |             |
| C    | 0.35083000  | -0.53509500 | 0.44934400  |
| C    | 4.25913700  | -1.25444100 | -2.35803200 |
| H    | 5.33634300  | -1.38381400 | -2.35832600 |
| C    | 3.57879600  | -1.00970700 | -3.54760500 |

|   |             |             |             |
|---|-------------|-------------|-------------|
| H | 4.11890800  | -0.96394300 | -4.48738800 |
| C | 2.20143000  | -0.80468100 | -3.51551600 |
| H | 1.66182600  | -0.59221600 | -4.43323300 |
| C | 1.49567500  | -0.87504600 | -2.31776300 |
| H | 0.42567600  | -0.71140200 | -2.29249900 |
| C | 2.17831000  | -1.15513900 | -1.13628900 |
| C | 1.90549400  | -2.06606300 | 1.16508400  |
| C | 1.05900200  | -1.76561600 | 2.23293700  |
| C | 1.16737900  | -2.41090200 | 3.46608400  |
| H | 0.51439800  | -2.16671300 | 4.29601800  |
| C | 2.13944300  | -3.39327500 | 3.58242000  |
| H | 2.25286700  | -3.92020500 | 4.52345300  |
| C | 2.96420900  | -3.73110900 | 2.49725500  |
| H | 3.69610300  | -4.52308100 | 2.61167300  |
| C | 2.86105100  | -3.08166800 | 1.27507300  |
| H | 3.48419500  | -3.37475400 | 0.44019800  |
| C | -0.87916000 | -0.23440200 | 2.61786200  |
| H | -1.13568600 | -0.98778000 | 3.36951900  |
| H | -1.76693000 | -0.06988000 | 2.01104700  |
| C | -0.42678100 | 1.06388000  | 3.28081000  |
| H | -0.24689000 | 1.80700100  | 2.49847100  |
| H | -1.26804800 | 1.42373800  | 3.88488800  |
| C | 0.81740700  | 0.92793200  | 4.15281300  |
| H | 1.67502900  | 0.58314900  | 3.56643400  |
| H | 0.66037500  | 0.21618100  | 4.96979500  |
| H | 1.08407800  | 1.89185900  | 4.59387100  |
| N | 1.47448800  | -1.25722800 | 0.10436200  |
| N | 0.15250800  | -0.82433700 | 1.75886600  |
| B | 0.45052000  | 2.36765100  | -0.11210800 |
| B | -1.66352600 | -0.24104100 | -0.54895400 |

|   |             |             |             |
|---|-------------|-------------|-------------|
| C | 2.38439400  | 2.96098300  | -1.13410900 |
| C | 3.48499200  | 2.27785700  | -1.92330000 |
| H | 3.58073300  | 1.22903500  | -1.64205400 |
| H | 4.44125300  | 2.78351100  | -1.75424300 |
| H | 3.25551700  | 2.32599000  | -2.99135900 |
| C | 2.11935200  | 4.35896800  | -1.69133400 |
| H | 1.78622900  | 4.26603200  | -2.72796100 |
| H | 3.02284500  | 4.97379900  | -1.67058300 |
| H | 1.33524900  | 4.86797700  | -1.12251900 |
| C | 2.58863200  | 2.96063500  | 0.41476100  |
| C | 3.30476000  | 1.71377600  | 0.92429500  |
| H | 3.25246600  | 1.69820400  | 2.01636600  |
| H | 4.35696000  | 1.70774500  | 0.62600000  |
| H | 2.82545000  | 0.81034000  | 0.53923200  |
| C | 3.25064500  | 4.21230600  | 0.96921200  |
| H | 2.66712000  | 5.10659300  | 0.74483300  |
| H | 4.25319100  | 4.33106600  | 0.54675800  |
| H | 3.34592600  | 4.12501000  | 2.05480000  |
| C | -2.35327500 | -2.44775400 | -0.59051600 |
| C | -1.19424400 | -3.34025500 | -0.14313000 |
| H | -0.22309400 | -2.91366600 | -0.39988500 |
| H | -1.26454800 | -4.32942500 | -0.60478300 |
| H | -1.24329900 | -3.45951300 | 0.94365400  |
| C | -3.66624300 | -3.16822700 | -0.30862700 |
| H | -3.67377600 | -3.51225100 | 0.72927000  |
| H | -3.77349700 | -4.04236200 | -0.95805900 |
| H | -4.52286500 | -2.50877400 | -0.45701500 |
| C | -2.20311300 | -1.92068600 | -2.06041500 |
| C | -1.35512800 | -2.80448000 | -2.96722400 |
| H | -1.27029600 | -2.33773400 | -3.95315100 |

|   |             |             |             |
|---|-------------|-------------|-------------|
| H | -1.83070100 | -3.78229900 | -3.09225700 |
| H | -0.34873300 | -2.95386400 | -2.57345600 |
| C | -3.54807800 | -1.65706900 | -2.73629200 |
| H | -4.20542800 | -1.06974800 | -2.09210900 |
| H | -4.05409900 | -2.59300700 | -2.98880900 |
| H | -3.37445400 | -1.09653300 | -3.65912200 |
| O | 1.15136900  | 2.21629700  | -1.28479100 |
| O | 1.22633100  | 2.90062800  | 0.89558600  |
| O | -2.33367200 | -1.23737300 | 0.17804500  |
| O | -1.55205100 | -0.64315500 | -1.88838000 |
| C | -5.69794100 | 1.63475300  | -0.74889600 |
| C | -4.34533400 | 1.37705200  | -0.95416600 |
| C | -3.41594700 | 1.55558000  | 0.07779800  |
| C | -3.87631000 | 2.00359500  | 1.32142300  |
| C | -5.23082100 | 2.25571800  | 1.53147300  |
| C | -6.14625300 | 2.06945700  | 0.49812300  |
| H | -6.40305800 | 1.50152700  | -1.56375700 |
| H | -3.99109400 | 1.05765100  | -1.92995400 |
| H | -3.15944300 | 2.14894700  | 2.12626400  |
| H | -5.57140500 | 2.59768200  | 2.50403100  |
| H | -7.20112900 | 2.26531400  | 0.66150700  |
| C | -1.96360400 | 1.27850400  | -0.14686200 |
| C | -1.09973700 | 2.28674600  | 0.04554400  |
| H | -1.53855500 | 3.24455700  | 0.35035500  |
| C | 3.56768200  | -1.31194000 | -1.15086900 |
| H | 4.11462500  | -1.44434100 | -0.22508200 |

7

|   |            |             |             |
|---|------------|-------------|-------------|
| C | 0.72317200 | -0.38116900 | 0.69861700  |
| C | 4.72465800 | -0.70631600 | -1.96401500 |

|   |             |             |             |
|---|-------------|-------------|-------------|
| H | 5.80733700  | -0.77168400 | -1.93737800 |
| C | 4.06818600  | -0.40834300 | -3.15628700 |
| H | 4.63697300  | -0.25091500 | -4.06671100 |
| C | 2.67900400  | -0.29662300 | -3.16956300 |
| H | 2.16081500  | -0.04584700 | -4.09012500 |
| C | 1.94170800  | -0.50017000 | -2.00726900 |
| H | 0.86300000  | -0.38613100 | -1.99629300 |
| C | 2.60440200  | -0.83439400 | -0.82707900 |
| C | 2.10019500  | -2.15104900 | 1.23122400  |
| C | 1.09238600  | -2.07011100 | 2.19789100  |
| C | 1.01050800  | -2.98143700 | 3.24969900  |
| H | 0.23622400  | -2.91072600 | 4.00570900  |
| C | 1.96113100  | -3.99348800 | 3.28641800  |
| H | 1.93006600  | -4.72256400 | 4.08892400  |
| C | 2.95390700  | -4.09660300 | 2.29945900  |
| H | 3.67045100  | -4.90933300 | 2.34977100  |
| C | 3.04032100  | -3.18249800 | 1.25557600  |
| H | 3.80183400  | -3.27771900 | 0.49066300  |
| C | -0.86575300 | -0.53743600 | 2.59451100  |
| H | -1.17078200 | -1.35960800 | 3.24851600  |
| H | -1.67671300 | -0.35677700 | 1.88794700  |
| C | -0.55164900 | 0.71209600  | 3.41011200  |
| H | -0.30194100 | 1.52389200  | 2.71764500  |
| H | -1.46435000 | 1.00287800  | 3.94313800  |
| C | 0.59066300  | 0.50155600  | 4.40077000  |
| H | 1.52052300  | 0.25530800  | 3.87788200  |
| H | 0.36816800  | -0.31751900 | 5.09305200  |
| H | 0.76963100  | 1.40379800  | 4.99073300  |
| N | 1.84786700  | -1.09363500 | 0.35090200  |
| N | 0.29214000  | -0.99411700 | 1.82818600  |

|   |             |             |             |
|---|-------------|-------------|-------------|
| B | 0.12338000  | 2.34204800  | 0.04060900  |
| B | -1.89404400 | -0.23736800 | -0.89759700 |
| C | 1.94360300  | 3.25853400  | -0.95691600 |
| C | 3.17669500  | 2.76776200  | -1.69437500 |
| H | 3.48251000  | 1.77648400  | -1.35711000 |
| H | 4.00438000  | 3.46827600  | -1.54048300 |
| H | 2.96830300  | 2.71472100  | -2.76643400 |
| C | 1.46051800  | 4.57828900  | -1.55893200 |
| H | 1.18736000  | 4.40729600  | -2.60319800 |
| H | 2.23870200  | 5.34541500  | -1.52432900 |
| H | 0.57813700  | 4.94944500  | -1.02847700 |
| C | 2.10555500  | 3.32778600  | 0.59662000  |
| C | 3.03640400  | 2.25546300  | 1.15436200  |
| H | 2.93777900  | 2.23944700  | 2.24372700  |
| H | 4.07991400  | 2.46443900  | 0.90216000  |
| H | 2.76701600  | 1.27119600  | 0.76660100  |
| C | 2.50666000  | 4.69542400  | 1.12901200  |
| H | 1.76376300  | 5.45499100  | 0.87990400  |
| H | 3.47314800  | 4.99813000  | 0.71428900  |
| H | 2.60241300  | 4.64978500  | 2.21713100  |
| C | -1.94472000 | -2.49220000 | -1.26415600 |
| C | -0.62478700 | -3.11101900 | -0.81641200 |
| H | 0.19955600  | -2.40257100 | -0.91793500 |
| H | -0.39222700 | -4.00265000 | -1.40543900 |
| H | -0.70502200 | -3.39809900 | 0.23639500  |
| C | -3.04941600 | -3.53721200 | -1.21616500 |
| H | -3.03797500 | -4.03216600 | -0.24154000 |
| H | -2.88912200 | -4.29763800 | -1.98644100 |
| H | -4.03311700 | -3.08826400 | -1.36238800 |
| C | -1.83264400 | -1.72188000 | -2.62175300 |

|   |             |             |             |
|---|-------------|-------------|-------------|
| C | -0.78598100 | -2.26189200 | -3.58250300 |
| H | -0.75785600 | -1.63619000 | -4.47883200 |
| H | -1.05020800 | -3.27975400 | -3.88541400 |
| H | 0.21113000  | -2.27808800 | -3.14122300 |
| C | -3.17472000 | -1.59230300 | -3.33878100 |
| H | -3.95398900 | -1.24964300 | -2.65298100 |
| H | -3.48867400 | -2.54749100 | -3.76740900 |
| H | -3.07562600 | -0.86235900 | -4.14586000 |
| O | 0.85826200  | 2.31398100  | -1.12285900 |
| O | 0.77020200  | 3.02798000  | 1.05085000  |
| O | -2.27740300 | -1.43175400 | -0.33783500 |
| O | -1.46088100 | -0.38146800 | -2.19525100 |
| C | -6.03329200 | 1.03582400  | -0.39084900 |
| C | -4.68691500 | 0.93961600  | -0.72852500 |
| C | -3.68683300 | 1.20596800  | 0.21572100  |
| C | -4.07442100 | 1.55648600  | 1.51489400  |
| C | -5.42123300 | 1.64596300  | 1.85773100  |
| C | -6.40536700 | 1.38662700  | 0.90615600  |
| H | -6.79298700 | 0.84040900  | -1.14120700 |
| H | -4.40223200 | 0.68826700  | -1.74736700 |
| H | -3.30682000 | 1.74515000  | 2.26119100  |
| H | -5.70197600 | 1.91219400  | 2.87206700  |
| H | -7.45500500 | 1.45439000  | 1.17328400  |
| C | -2.24292400 | 1.11439100  | -0.16067100 |
| C | -1.41428100 | 2.10257400  | 0.21556700  |
| H | -1.88825700 | 2.92722000  | 0.76117200  |
| C | 3.99725600  | -0.91581000 | -0.79456200 |
| H | 4.50561700  | -1.12288200 | 0.14158200  |

|   |             |             |             |
|---|-------------|-------------|-------------|
| C | 1.12716600  | -0.18650400 | 0.30780900  |
| C | 1.28116900  | 3.66898400  | -1.85631900 |
| H | 0.51608400  | 4.07414200  | -2.50976700 |
| C | 2.31073900  | 4.48529900  | -1.39148100 |
| H | 2.34592100  | 5.53018300  | -1.68071900 |
| C | 3.29441300  | 3.96132900  | -0.55555500 |
| H | 4.09426800  | 4.59547200  | -0.18914800 |
| C | 3.24919900  | 2.62309400  | -0.17485300 |
| H | 3.99497400  | 2.20600900  | 0.49444600  |
| C | 2.21900000  | 1.81792100  | -0.65286700 |
| C | 3.22083200  | -0.47174700 | -0.46802800 |
| C | 2.75908200  | -1.69408100 | 0.02568600  |
| C | 3.55162800  | -2.84096100 | -0.01401500 |
| H | 3.20195500  | -3.79110500 | 0.37311200  |
| C | 4.81357500  | -2.70929200 | -0.57673900 |
| H | 5.46206300  | -3.57679700 | -0.62641800 |
| C | 5.27067200  | -1.48012000 | -1.08416200 |
| H | 6.26188800  | -1.42233700 | -1.51987100 |
| C | 4.48392000  | -0.33747700 | -1.04129100 |
| H | 4.83032500  | 0.61152800  | -1.43418500 |
| C | 0.63044200  | -2.47088000 | 1.17150400  |
| H | 0.95910100  | -3.45075200 | 0.81423600  |
| H | -0.39483900 | -2.30718900 | 0.83889600  |
| C | 0.75250100  | -2.36067500 | 2.68667600  |
| H | 0.43710700  | -1.35255300 | 2.97602700  |
| H | 0.02651600  | -3.05489400 | 3.12324000  |
| C | 2.15128600  | -2.65286900 | 3.22080100  |
| H | 2.88526600  | -1.94323100 | 2.82655300  |
| H | 2.47503200  | -3.66160500 | 2.94407500  |
| H | 2.17331100  | -2.58054500 | 4.31068000  |

|   |             |             |             |
|---|-------------|-------------|-------------|
| N | 2.18281500  | 0.43819900  | -0.27050200 |
| N | 1.46447200  | -1.47295200 | 0.48912500  |
| B | -0.30444900 | 0.52174600  | 0.46942100  |
| B | -1.60427900 | -0.17110400 | -0.37069400 |
| C | -1.65048200 | 1.88665200  | 1.81947200  |
| C | -1.52482000 | 2.70177800  | 3.10482500  |
| H | -0.92587600 | 2.18170700  | 3.85389800  |
| H | -2.51148600 | 2.91244000  | 3.52842900  |
| H | -1.04154200 | 3.65706300  | 2.88121600  |
| C | -2.25860700 | 2.79173200  | 0.74329300  |
| H | -1.56022500 | 3.61630400  | 0.56783900  |
| H | -3.20457900 | 3.21775000  | 1.09050600  |
| H | -2.43630800 | 2.26656600  | -0.19396200 |
| C | -2.41695600 | 0.51042900  | 2.03672400  |
| C | -2.17065400 | -0.04053500 | 3.44341300  |
| H | -2.53698900 | -1.06997100 | 3.47884000  |
| H | -2.69367700 | 0.54065000  | 4.20773100  |
| H | -1.10354200 | -0.04627300 | 3.67973000  |
| C | -3.92124500 | 0.65952600  | 1.80683200  |
| H | -4.12912900 | 0.89186200  | 0.76194800  |
| H | -4.33461000 | 1.44651300  | 2.44747100  |
| H | -4.41988800 | -0.28104100 | 2.06173000  |
| C | -2.46749200 | -1.84131300 | -1.71867300 |
| C | -2.07040400 | -2.78094300 | -2.84934600 |
| H | -1.29655000 | -2.33649200 | -3.47843600 |
| H | -2.93386300 | -3.02918500 | -3.47568100 |
| H | -1.67734900 | -3.71240600 | -2.43071300 |
| C | -3.40851400 | -2.56570400 | -0.75002500 |
| H | -2.86690400 | -3.40099200 | -0.29534100 |
| H | -4.28985500 | -2.96432200 | -1.26244300 |

|   |             |             |             |
|---|-------------|-------------|-------------|
| H | -3.72974800 | -1.89172200 | 0.04851700  |
| C | -3.04869100 | -0.47171600 | -2.18232700 |
| C | -2.33709800 | 0.05769300  | -3.43007500 |
| H | -2.61561800 | 1.10521700  | -3.57692600 |
| H | -2.61169700 | -0.50260500 | -4.32913800 |
| H | -1.25224100 | 0.00175100  | -3.29835700 |
| C | -4.55617100 | -0.46230700 | -2.40101600 |
| H | -5.08675700 | -0.69098100 | -1.47436200 |
| H | -4.84604100 | -1.19372000 | -3.16315000 |
| H | -4.87440000 | 0.52734900  | -2.74261800 |
| O | -0.32596500 | 1.51372100  | 1.43612500  |
| O | -1.87813900 | -0.47275000 | 1.15836000  |
| O | -1.29583500 | -1.43537300 | -1.01903300 |
| O | -2.72905700 | 0.38895300  | -1.09234800 |
| C | 1.23450300  | 2.32537400  | -1.49744000 |
| H | 0.44054400  | 1.67574900  | -1.85364900 |

9

|   |             |             |             |
|---|-------------|-------------|-------------|
| C | 0.99138900  | 0.01984500  | 0.53187700  |
| C | 2.38509200  | 4.21841800  | -1.17972200 |
| H | 3.04832500  | 5.05106900  | -0.97233100 |
| C | 1.32145400  | 4.37087000  | -2.06748800 |
| H | 1.15919300  | 5.32493500  | -2.55759800 |
| C | 0.46656900  | 3.30109100  | -2.32371000 |
| H | -0.36127500 | 3.41937700  | -3.01497200 |
| C | 0.67027200  | 2.06795700  | -1.70740500 |
| H | 0.01235500  | 1.22161100  | -1.91041400 |
| C | 1.73315500  | 1.93979100  | -0.81673100 |
| C | 3.14132400  | -0.02399100 | -0.09741600 |
| C | 2.87833200  | -1.16596800 | 0.66602300  |

|   |             |             |             |
|---|-------------|-------------|-------------|
| C | 3.86822300  | -2.11215100 | 0.93197100  |
| H | 3.66955900  | -2.99361700 | 1.53090700  |
| C | 5.12059100  | -1.87031100 | 0.38819500  |
| H | 5.92002400  | -2.58037300 | 0.56745100  |
| C | 5.37933400  | -0.72971600 | -0.39431100 |
| H | 6.37183900  | -0.58555900 | -0.80616900 |
| C | 4.39745200  | 0.21478000  | -0.65395600 |
| H | 4.59371300  | 1.09276900  | -1.25840600 |
| C | 0.79269600  | -2.06561900 | 1.84561100  |
| H | 1.33981200  | -3.01097900 | 1.79877300  |
| H | -0.17893000 | -2.20765700 | 1.35810900  |
| C | 0.65606800  | -1.57963200 | 3.28612500  |
| H | 0.10479100  | -0.63056000 | 3.28609800  |
| H | 0.03515400  | -2.30687800 | 3.81919400  |
| C | 1.99832100  | -1.40682300 | 3.99061800  |
| H | 2.61524600  | -0.65408800 | 3.48988100  |
| H | 2.55714200  | -2.34810400 | 4.00381700  |
| H | 1.85620300  | -1.08449800 | 5.02443400  |
| N | 1.94322400  | 0.68880800  | -0.14958400 |
| N | 1.53544900  | -1.10112200 | 1.02212600  |
| B | -0.57132600 | 0.39075200  | 0.57253700  |
| B | -1.76629600 | -0.41950900 | -0.39737900 |
| C | -2.21938600 | 1.91479600  | 1.47929300  |
| C | -2.33964700 | 2.50626600  | 2.87978100  |
| H | -2.17045100 | 1.74464500  | 3.64450700  |
| H | -3.32150200 | 2.95632300  | 3.03950500  |
| H | -1.58259600 | 3.28561300  | 3.00387900  |
| C | -2.28634900 | 3.01422900  | 0.42247600  |
| H | -1.41299200 | 3.66488500  | 0.52495700  |
| H | -3.18657200 | 3.62237400  | 0.54064600  |

|   |             |             |             |
|---|-------------|-------------|-------------|
| H | -2.28371600 | 2.57065500  | -0.57675300 |
| C | -3.25273200 | 0.77429500  | 1.18996000  |
| C | -3.16685700 | -0.33930500 | 2.24685800  |
| H | -3.79965800 | -1.16681000 | 1.91737500  |
| H | -3.51757200 | 0.00109200  | 3.22511200  |
| H | -2.15015600 | -0.72768200 | 2.35645600  |
| C | -4.67947300 | 1.33200100  | 1.19155700  |
| H | -4.80559200 | 2.07812300  | 0.40379700  |
| H | -4.95816000 | 1.77438000  | 2.15138000  |
| H | -5.36568300 | 0.50636700  | 0.98335400  |
| C | -1.95178600 | -2.55856500 | -1.35802500 |
| C | -1.35439400 | -3.95779100 | -1.26569700 |
| H | -0.31988200 | -3.92071300 | -0.91555000 |
| H | -1.37940600 | -4.46292300 | -2.23752600 |
| H | -1.93194000 | -4.55972700 | -0.55710400 |
| C | -3.45440700 | -2.65495700 | -1.64844000 |
| H | -3.94263500 | -3.14046100 | -0.79783800 |
| H | -3.66506500 | -3.24200500 | -2.54832100 |
| H | -3.88010400 | -1.65482800 | -1.76107500 |
| C | -1.23025100 | -1.61191600 | -2.36690800 |
| C | 0.29014100  | -1.81320100 | -2.34098200 |
| H | 0.77041700  | -0.97081000 | -2.85000900 |
| H | 0.59119600  | -2.73685700 | -2.84555400 |
| H | 0.65355900  | -1.85223200 | -1.30935400 |
| C | -1.73182900 | -1.71690000 | -3.80318700 |
| H | -2.78533500 | -1.43719300 | -3.86855000 |
| H | -1.61331700 | -2.73512300 | -4.18917700 |
| H | -1.15777700 | -1.04209300 | -4.44612600 |
| O | -0.85841300 | 1.39776100  | 1.42398600  |
| O | -3.05254400 | 0.24919400  | -0.10399900 |

|   |             |             |             |
|---|-------------|-------------|-------------|
| O | -1.76034900 | -1.88537600 | -0.12451000 |
| O | -1.53986100 | -0.32549100 | -1.86005000 |
| C | 2.59327000  | 3.00000100  | -0.54113700 |
| H | 3.39907800  | 2.87387600  | 0.17479700  |

10-ts

|   |             |             |             |
|---|-------------|-------------|-------------|
| C | -0.96774000 | -0.26999900 | -0.40859700 |
| C | -1.56539500 | 3.87463000  | 1.77038000  |
| H | -1.77031100 | 4.23504000  | 2.77250400  |
| C | -1.04703600 | 4.73445900  | 0.80481400  |
| H | -0.84409200 | 5.77042200  | 1.05518000  |
| C | -0.79544300 | 4.26937400  | -0.48504200 |
| H | -0.40000000 | 4.94189900  | -1.23896800 |
| C | -1.05338300 | 2.94258500  | -0.81744900 |
| H | -0.85199900 | 2.55667800  | -1.80862300 |
| C | -1.55050100 | 2.08943400  | 0.16244600  |
| C | -3.14302200 | 0.19583900  | -0.10550300 |
| C | -3.01739800 | -1.17088200 | -0.36355700 |
| C | -4.13330100 | -2.00978700 | -0.40643500 |
| H | -4.04472200 | -3.07010100 | -0.61282200 |
| C | -5.36514900 | -1.41761500 | -0.17713000 |
| H | -6.25837600 | -2.03172700 | -0.19892700 |
| C | -5.48832500 | -0.03827200 | 0.08012500  |
| H | -6.47378400 | 0.38147200  | 0.24856700  |
| C | -4.38228600 | 0.79573600  | 0.12002100  |
| H | -4.46757100 | 1.85861400  | 0.31579000  |
| C | -1.06073100 | -2.73345000 | -0.78023700 |
| H | -1.76338900 | -3.46781500 | -0.37692600 |
| H | -0.13751400 | -2.77516000 | -0.19660600 |
| C | -0.79365600 | -2.98586600 | -2.25980900 |

|   |             |             |             |
|---|-------------|-------------|-------------|
| H | -0.07156300 | -2.23920600 | -2.60761300 |
| H | -0.30343100 | -3.96158600 | -2.33947800 |
| C | -2.05232500 | -2.95575300 | -3.12138600 |
| H | -2.54169200 | -1.97772000 | -3.07779800 |
| H | -2.77274000 | -3.71016600 | -2.78873100 |
| H | -1.81141500 | -3.16048400 | -4.16688900 |
| N | -1.85451800 | 0.72014400  | -0.15280500 |
| N | -1.66145500 | -1.41149500 | -0.54562800 |
| B | 0.63363500  | -0.13891900 | -0.50374900 |
| B | 1.86389300  | -1.06304300 | 0.08310000  |
| C | 2.35037700  | 1.30410200  | -1.53939200 |
| C | 2.30905000  | 2.08535200  | -2.85428000 |
| H | 1.84195800  | 1.49443600  | -3.64567700 |
| H | 3.30506100  | 2.39370200  | -3.18123000 |
| H | 1.70612600  | 2.98672300  | -2.70351100 |
| C | 2.85283300  | 2.22431200  | -0.42187400 |
| H | 2.08809900  | 2.98336800  | -0.22978100 |
| H | 3.77585000  | 2.73137500  | -0.71803100 |
| H | 3.02189000  | 1.65587900  | 0.49380100  |
| C | 3.22542900  | 0.01042400  | -1.64264100 |
| C | 2.77891300  | -0.85217700 | -2.83055300 |
| H | 3.22885400  | -1.84392400 | -2.73088900 |
| H | 3.10584200  | -0.42036700 | -3.78083300 |
| H | 1.69260200  | -0.96004800 | -2.85565300 |
| C | 4.70909200  | 0.34821300  | -1.80647600 |
| H | 5.08676200  | 0.85968400  | -0.91824800 |
| H | 4.90200700  | 0.96899400  | -2.68488600 |
| H | 5.26710200  | -0.58602700 | -1.92011000 |
| C | 1.96286000  | -1.82681600 | 2.28957100  |
| C | 1.51745500  | -2.97297300 | 3.18870500  |

|   |             |             |             |
|---|-------------|-------------|-------------|
| H | 0.52920700  | -3.33839000 | 2.90174700  |
| H | 1.48742500  | -2.65877100 | 4.23721200  |
| H | 2.22612700  | -3.80184400 | 3.10319200  |
| C | 3.43147800  | -1.49197900 | 2.57523700  |
| H | 4.04442000  | -2.35516700 | 2.30029800  |
| H | 3.59532500  | -1.27451500 | 3.63519200  |
| H | 3.75360300  | -0.63742900 | 1.97525000  |
| C | 1.05592800  | -0.55703400 | 2.37319600  |
| C | -0.41836600 | -0.93545700 | 2.51316500  |
| H | -1.04109300 | -0.05952500 | 2.31074800  |
| H | -0.63306800 | -1.27413400 | 3.53081200  |
| H | -0.69547700 | -1.73700300 | 1.82427800  |
| C | 1.42957700  | 0.41197300  | 3.49089900  |
| H | 2.43528200  | 0.80909000  | 3.34109800  |
| H | 1.38471700  | -0.08023400 | 4.46862300  |
| H | 0.72627800  | 1.25099400  | 3.49736700  |
| O | 0.97872300  | 0.98148200  | -1.27256400 |
| O | 3.15807300  | -0.74853500 | -0.43899800 |
| O | 1.82249800  | -2.23333100 | 0.92988800  |
| O | 1.32133100  | 0.10686800  | 1.12960500  |
| C | -1.82332500 | 2.54428000  | 1.45022200  |
| H | -2.23678900 | 1.86444800  | 2.18887600  |

11

|   |             |             |             |
|---|-------------|-------------|-------------|
| C | -0.76509700 | -0.33286200 | 0.09355500  |
| C | -2.18344300 | 4.09094100  | 0.57005300  |
| H | -2.38489700 | 4.75458000  | 1.40402700  |
| C | -1.98744500 | 4.60892500  | -0.70864900 |
| H | -2.03615600 | 5.68061200  | -0.87116800 |
| C | -1.73058200 | 3.75508600  | -1.78048200 |

|   |             |             |             |
|---|-------------|-------------|-------------|
| H | -1.57908900 | 4.16038300  | -2.77535000 |
| C | -1.66826300 | 2.37941800  | -1.58000400 |
| H | -1.45089200 | 1.69475400  | -2.39131400 |
| C | -1.85655500 | 1.87721700  | -0.29746400 |
| C | -3.02269300 | -0.27713600 | 0.06991800  |
| C | -2.62450000 | -1.58602300 | 0.33785000  |
| C | -3.56295200 | -2.59450200 | 0.56142800  |
| H | -3.26926000 | -3.61456500 | 0.78004100  |
| C | -4.90087600 | -2.23082400 | 0.49343000  |
| H | -5.66109100 | -2.98573400 | 0.66058400  |
| C | -5.29602000 | -0.91049600 | 0.21268000  |
| H | -6.35307700 | -0.67288700 | 0.16720700  |
| C | -4.36343500 | 0.09387100  | -0.00346600 |
| H | -4.65275800 | 1.11724200  | -0.21509100 |
| C | -0.44839300 | -2.77383900 | 0.69924800  |
| H | -1.07510500 | -3.33515200 | 1.39816500  |
| H | 0.43737200  | -2.44669900 | 1.24529500  |
| C | -0.01984400 | -3.65163500 | -0.47498700 |
| H | 0.82677600  | -3.17212900 | -0.96932400 |
| H | 0.36232400  | -4.58097900 | -0.03916700 |
| C | -1.11917500 | -3.96185000 | -1.48402700 |
| H | -1.53188300 | -3.04618900 | -1.91975200 |
| H | -1.94205400 | -4.51881900 | -1.02601200 |
| H | -0.72139100 | -4.56751600 | -2.30219700 |
| N | -1.85054400 | 0.45752000  | -0.07660100 |
| N | -1.22945700 | -1.58092400 | 0.33633100  |
| B | 0.80566900  | 0.26216900  | 0.04161300  |
| B | 2.04854700  | -0.86924800 | 0.13293700  |
| C | 2.00766000  | 0.75540900  | -2.08025300 |
| C | 1.64256300  | 1.43198200  | -3.40538900 |

|   |             |             |             |
|---|-------------|-------------|-------------|
| H | 0.70939500  | 1.02961800  | -3.80604100 |
| H | 2.42826600  | 1.33453400  | -4.15847300 |
| H | 1.48639900  | 2.49732500  | -3.21107900 |
| C | 3.23996500  | 1.46562900  | -1.49934200 |
| H | 2.93358300  | 2.45543500  | -1.15082200 |
| H | 4.02143200  | 1.59222300  | -2.25398700 |
| H | 3.67128800  | 0.91977200  | -0.65663800 |
| C | 2.29061300  | -0.77887500 | -2.27065600 |
| C | 1.07264700  | -1.48431200 | -2.86294700 |
| H | 1.25592300  | -2.56105900 | -2.91355600 |
| H | 0.88247800  | -1.13354500 | -3.88004400 |
| H | 0.17765200  | -1.30051300 | -2.26088200 |
| C | 3.50769400  | -1.04136300 | -3.15662400 |
| H | 4.40795000  | -0.59500300 | -2.72875100 |
| H | 3.36438500  | -0.65349300 | -4.16748200 |
| H | 3.66585200  | -2.12142200 | -3.22449900 |
| C | 2.62021500  | -0.18584800 | 2.41006600  |
| C | 2.81559200  | -1.00689000 | 3.68238300  |
| H | 2.04647200  | -1.77777200 | 3.77080900  |
| H | 2.78816500  | -0.37829300 | 4.57599000  |
| H | 3.79029800  | -1.50133100 | 3.63999300  |
| C | 3.82850500  | 0.73020500  | 2.19996900  |
| H | 4.69162000  | 0.11963600  | 1.92264700  |
| H | 4.07424400  | 1.28349600  | 3.10999800  |
| H | 3.62748400  | 1.44843200  | 1.40085400  |
| C | 1.29123700  | 0.66173600  | 2.44918800  |
| C | 0.12057200  | -0.15136600 | 3.02989300  |
| H | -0.81160200 | 0.37972300  | 2.81124600  |
| H | 0.21090100  | -0.24869600 | 4.11556700  |
| H | 0.05053100  | -1.15858800 | 2.61894800  |

|   |             |             |             |
|---|-------------|-------------|-------------|
| C | 1.46933100  | 1.89070000  | 3.35144000  |
| H | 2.16803500  | 2.59957900  | 2.90399000  |
| H | 1.81785400  | 1.62891200  | 4.35443700  |
| H | 0.49900600  | 2.38781300  | 3.44497200  |
| O | 0.87961900  | 0.96348900  | -1.24836900 |
| O | 2.64222400  | -1.38479700 | -1.00064000 |
| O | 2.66596500  | -1.15620900 | 1.33309600  |
| O | 0.96299200  | 1.19747200  | 1.18032400  |
| C | -2.12000800 | 2.71610700  | 0.78037200  |
| H | -2.26777800 | 2.28946100  | 1.76761000  |

12

|   |             |             |             |
|---|-------------|-------------|-------------|
| B | -0.00001900 | -0.83565600 | -0.00007300 |
| B | -0.00001800 | 0.83562400  | 0.00028900  |
| C | -2.33311100 | -0.66045900 | 0.42791000  |
| C | -3.53735400 | -1.53994500 | 0.10189100  |
| H | -3.53779100 | -1.83501200 | -0.94929100 |
| H | -4.47923600 | -1.04066100 | 0.33529100  |
| H | -3.47319300 | -2.44745200 | 0.70752300  |
| C | -2.29958000 | -0.36439900 | 1.92827400  |
| H | -2.14424300 | -1.30342600 | 2.46476500  |
| H | -3.24017700 | 0.07358200  | 2.26897200  |
| H | -1.48671500 | 0.32105000  | 2.18550600  |
| C | -2.33304100 | 0.66050500  | -0.42791000 |
| C | -2.29940500 | 0.36442700  | -1.92827600 |
| H | -2.14401700 | 1.30344200  | -2.46476900 |
| H | -3.23996700 | -0.07356300 | -2.26905100 |
| H | -1.48650300 | -0.32103600 | -2.18537500 |
| C | -3.53731200 | 1.53996800  | -0.10202700 |
| H | -3.53786100 | 1.83506700  | 0.94914400  |

|   |             |             |             |
|---|-------------|-------------|-------------|
| H | -4.47915900 | 1.04065300  | -0.33551300 |
| H | -3.47308500 | 2.44745000  | -0.70768900 |
| C | 2.33306900  | 0.66030000  | 0.42816300  |
| C | 3.53730900  | 1.53988600  | 0.10245200  |
| H | 3.53784600  | 1.83520000  | -0.94866300 |
| H | 4.47918400  | 1.04058200  | 0.33583700  |
| H | 3.47304800  | 2.44725400  | 0.70828100  |
| C | 2.29964400  | 0.36348600  | 1.92836800  |
| H | 2.14448700  | 1.30225500  | 2.46535500  |
| H | 3.24020900  | -0.07482200 | 2.26874300  |
| H | 1.48668500  | -0.32198100 | 2.18525700  |
| C | 2.33305000  | -0.66029600 | -0.42817200 |
| C | 2.29946600  | -0.36351100 | -1.92839600 |
| H | 2.14383600  | -1.30223900 | -2.46531500 |
| H | 3.24015400  | 0.07437800  | -2.26898100 |
| H | 1.48676200  | 0.32230100  | -2.18518900 |
| C | 3.53729800  | -1.53989700 | -0.10258400 |
| H | 3.53778900  | -1.83533200 | 0.94849800  |
| H | 4.47916300  | -1.04053200 | -0.33586800 |
| H | 3.47306400  | -2.44718800 | -0.70853100 |
| O | -1.18336600 | -1.49906900 | 0.12938300  |
| O | -1.18330000 | 1.49908500  | -0.12930800 |
| O | 1.18331500  | 1.49896900  | 0.13006000  |
| O | 1.18331500  | -1.49900900 | -0.12990700 |

13-ts

|   |             |             |             |
|---|-------------|-------------|-------------|
| B | -0.08295100 | -0.69192800 | 0.19463200  |
| B | -1.34461200 | 0.78553100  | -0.68870100 |
| C | -2.33087400 | -1.68206600 | 0.71350500  |
| C | -2.69668000 | -3.13770200 | 1.01907700  |

|   |             |             |             |
|---|-------------|-------------|-------------|
| H | -2.21307300 | -3.81711300 | 0.31428400  |
| H | -3.77517400 | -3.30652900 | 1.00116900  |
| H | -2.33171000 | -3.37476400 | 2.02213000  |
| C | -2.93628400 | -0.78757700 | 1.80617200  |
| H | -2.33973700 | -0.90038300 | 2.71514800  |
| H | -3.96153200 | -1.09561900 | 2.02854600  |
| H | -2.94483100 | 0.26674000  | 1.52620400  |
| C | -2.83304800 | -1.26530500 | -0.70523000 |
| C | -2.28084900 | -2.18996700 | -1.79304100 |
| H | -2.42977300 | -1.71686200 | -2.76682300 |
| H | -2.81916000 | -3.14090200 | -1.78986200 |
| H | -1.21782900 | -2.39090400 | -1.65350300 |
| C | -4.35943200 | -1.23993800 | -0.78770800 |
| H | -4.77745800 | -0.51365200 | -0.08762500 |
| H | -4.79048700 | -2.22198500 | -0.58599000 |
| H | -4.64693600 | -0.94296100 | -1.79979200 |
| C | -0.08658300 | 2.73167800  | -0.51710200 |
| C | 1.29103000  | 2.66842000  | -1.17478500 |
| H | 1.69195100  | 1.65551200  | -1.20644700 |
| H | 1.99653900  | 3.31282800  | -0.64315600 |
| H | 1.19767500  | 3.03554100  | -2.19996600 |
| C | -0.56314900 | 4.18101400  | -0.52534700 |
| H | -0.49461100 | 4.56905600  | -1.54428200 |
| H | 0.06984400  | 4.79901700  | 0.11771400  |
| H | -1.59868800 | 4.26853500  | -0.19393800 |
| C | -0.15423600 | 2.06315000  | 0.91121900  |
| C | 1.17773500  | 1.89925800  | 1.61774700  |
| H | 1.03296200  | 1.33438000  | 2.54263700  |
| H | 1.56337900  | 2.88896800  | 1.87922700  |
| H | 1.91968300  | 1.38643800  | 1.00629400  |

|   |             |             |             |
|---|-------------|-------------|-------------|
| C | -1.17203200 | 2.71742700  | 1.83977400  |
| H | -2.15546000 | 2.77832500  | 1.36535400  |
| H | -0.85399100 | 3.72402200  | 2.11950500  |
| H | -1.26204100 | 2.11412400  | 2.74611800  |
| O | -0.90132900 | -1.66746100 | 0.78833800  |
| O | -2.45624700 | 0.09122500  | -1.03344800 |
| O | -1.01569500 | 1.96439700  | -1.30700800 |
| O | -0.74715600 | 0.74165200  | 0.63576900  |
| C | 4.71056400  | -1.40854800 | 1.27136700  |
| C | 3.34131300  | -1.20825300 | 1.12064800  |
| C | 2.78942500  | -0.99925900 | -0.14916100 |
| C | 3.63726000  | -0.98582900 | -1.26551800 |
| C | 5.00462500  | -1.18564000 | -1.11580900 |
| C | 5.54370000  | -1.39843500 | 0.15385200  |
| H | 5.12951800  | -1.57045300 | 2.25944100  |
| H | 2.68324700  | -1.21015000 | 1.98524500  |
| H | 3.20885000  | -0.81833900 | -2.25041000 |
| H | 5.65266000  | -1.17530100 | -1.98637400 |
| H | 6.61146900  | -1.55370300 | 0.27130000  |
| C | 1.35458200  | -0.76919300 | -0.30377700 |
| C | 0.47439500  | -0.56499000 | -1.28577800 |
| H | 0.48716600  | -0.51986100 | -2.37163800 |

14

|   |             |             |             |
|---|-------------|-------------|-------------|
| B | -0.04096400 | -0.30118400 | 0.77165600  |
| B | -1.05233200 | 0.43742100  | -1.32828900 |
| C | -2.04207700 | -1.81598100 | 0.77224200  |
| C | -2.19941400 | -3.24455500 | 1.28913800  |
| H | -1.48353600 | -3.91489200 | 0.80856900  |
| H | -3.21072000 | -3.62183900 | 1.12691900  |

|   |             |             |             |
|---|-------------|-------------|-------------|
| H | -2.00179600 | -3.24883900 | 2.36429300  |
| C | -2.98218500 | -0.88273600 | 1.53690000  |
| H | -2.63652600 | -0.80632700 | 2.57092500  |
| H | -3.99540100 | -1.29279000 | 1.54591700  |
| H | -3.00104600 | 0.11506300  | 1.09881300  |
| C | -2.27679400 | -1.73626900 | -0.78209600 |
| C | -1.31914800 | -2.64635300 | -1.55311900 |
| H | -1.31616100 | -2.34720400 | -2.60520700 |
| H | -1.66515000 | -3.68161500 | -1.49875900 |
| H | -0.30197100 | -2.59378700 | -1.16641700 |
| C | -3.71783700 | -2.08876500 | -1.15192300 |
| H | -4.42035000 | -1.39241300 | -0.68982700 |
| H | -3.97305200 | -3.10799700 | -0.85616300 |
| H | -3.82620100 | -2.01143900 | -2.23723600 |
| C | -0.46379100 | 2.70095200  | -0.56500500 |
| C | 0.85822600  | 2.88614400  | -1.33243800 |
| H | 1.57796300  | 2.08204700  | -1.20380600 |
| H | 1.33203200  | 3.82304700  | -1.02696000 |
| H | 0.61494300  | 2.96485000  | -2.39596100 |
| C | -1.19258900 | 4.04506400  | -0.66535600 |
| H | -1.24206400 | 4.32969900  | -1.71973100 |
| H | -0.65531400 | 4.82937500  | -0.12662800 |
| H | -2.21077000 | 3.97854100  | -0.28114300 |
| C | -0.28524300 | 2.24234400  | 0.96905800  |
| C | 1.13321500  | 2.48369400  | 1.47952300  |
| H | 1.18143500  | 2.21812700  | 2.53904400  |
| H | 1.40085500  | 3.53932100  | 1.37727700  |
| H | 1.87050300  | 1.88549900  | 0.93929700  |
| C | -1.27982200 | 2.94805000  | 1.89498300  |
| H | -2.30668000 | 2.76308700  | 1.56938400  |

|   |             |             |             |
|---|-------------|-------------|-------------|
| H | -1.10681300 | 4.02433600  | 1.94007000  |
| H | -1.16185300 | 2.53436200  | 2.89921700  |
| O | -0.66261500 | -1.49746900 | 1.03542100  |
| O | -2.14904100 | -0.36128900 | -1.17892700 |
| O | -1.33940800 | 1.77988200  | -1.22136000 |
| O | -0.63915000 | 0.85970000  | 1.16340800  |
| C | 4.28189100  | -1.62047000 | 1.23579100  |
| C | 2.95182600  | -1.25359200 | 1.05485000  |
| C | 2.51069400  | -0.71776700 | -0.16295100 |
| C | 3.44794300  | -0.53467000 | -1.18986700 |
| C | 4.77793600  | -0.89696700 | -1.00979500 |
| C | 5.19940200  | -1.44452500 | 0.20229000  |
| H | 4.60343900  | -2.03965700 | 2.18393700  |
| H | 2.23685300  | -1.39192300 | 1.86298900  |
| H | 3.13246000  | -0.09597800 | -2.13252800 |
| H | 5.49150800  | -0.74706100 | -1.81383400 |
| H | 6.23853100  | -1.72454700 | 0.34178400  |
| C | 1.09612000  | -0.33861800 | -0.31750200 |
| C | 0.44786300  | -0.06612300 | -1.46800000 |
| H | 0.94576900  | -0.10996100 | -2.43974800 |

15-ts

|   |             |             |             |
|---|-------------|-------------|-------------|
| B | -0.29544100 | 0.57458700  | 0.24132000  |
| B | 0.81299800  | -0.54415500 | -1.10397700 |
| C | 1.06345000  | 2.48573300  | 0.55477200  |
| C | 0.72411500  | 3.97281000  | 0.48720200  |
| H | 0.02294800  | 4.18787600  | -0.32052800 |
| H | 1.62478800  | 4.57555000  | 0.34766200  |
| H | 0.25870500  | 4.26646500  | 1.43130300  |
| C | 1.93725000  | 2.24583300  | 1.78513600  |

|   |             |             |             |
|---|-------------|-------------|-------------|
| H | 1.40859400  | 2.62683700  | 2.66271800  |
| H | 2.88758500  | 2.77923000  | 1.70155100  |
| H | 2.13741000  | 1.18640400  | 1.93822400  |
| C | 1.70300600  | 1.91389200  | -0.82059100 |
| C | 1.74730900  | 2.96208800  | -1.93231000 |
| H | 2.16532800  | 2.49753200  | -2.82890800 |
| H | 2.37715400  | 3.81221900  | -1.66139700 |
| H | 0.74573200  | 3.32284300  | -2.17325100 |
| C | 3.10853600  | 1.34562700  | -0.63461400 |
| H | 3.14466200  | 0.56931600  | 0.12902000  |
| H | 3.79809400  | 2.14789500  | -0.35797500 |
| H | 3.44555100  | 0.91129400  | -1.57870400 |
| C | 1.93212600  | -2.36636600 | -0.24332700 |
| C | 1.27082400  | -3.65416800 | -0.73510000 |
| H | 0.24887100  | -3.47606800 | -1.07652300 |
| H | 1.25284700  | -4.41676200 | 0.04870400  |
| H | 1.84783600  | -4.04094300 | -1.57866800 |
| C | 3.40598700  | -2.64201100 | 0.04214100  |
| H | 3.86316200  | -3.03172500 | -0.87068200 |
| H | 3.53208400  | -3.38557000 | 0.83323200  |
| H | 3.93692300  | -1.72985500 | 0.32103500  |
| C | 1.14768900  | -1.71629600 | 1.01495900  |
| C | -0.11935600 | -2.45323500 | 1.44391100  |
| H | -0.65854900 | -1.83449700 | 2.16793700  |
| H | 0.16005200  | -3.38606400 | 1.94058700  |
| H | -0.79369400 | -2.67963600 | 0.62146700  |
| C | 2.02162000  | -1.50735700 | 2.24658600  |
| H | 2.90769300  | -0.91181800 | 2.02058900  |
| H | 2.34341000  | -2.46896900 | 2.65348300  |
| H | 1.44140300  | -0.98850800 | 3.01480300  |

|   |             |             |             |
|---|-------------|-------------|-------------|
| O | -0.20310000 | 1.82493500  | 0.76496500  |
| O | 0.78139600  | 0.92079400  | -1.31574200 |
| O | 1.90677000  | -1.40078000 | -1.30571600 |
| O | 0.85132600  | -0.38817400 | 0.50555900  |
| C | -4.81952300 | 0.94250600  | 0.76830400  |
| C | -3.44764900 | 0.86039500  | 0.54600700  |
| C | -2.90882000 | -0.15951400 | -0.25026700 |
| C | -3.78204300 | -1.10552200 | -0.80653200 |
| C | -5.15148300 | -1.02610800 | -0.58251800 |
| C | -5.67638800 | -0.00026000 | 0.20457200  |
| H | -5.21986300 | 1.74127000  | 1.38496900  |
| H | -2.77746400 | 1.59579000  | 0.98387000  |
| H | -3.37785300 | -1.91447300 | -1.40901700 |
| H | -5.81370600 | -1.76858900 | -1.01702400 |
| H | -6.74561100 | 0.05904100  | 0.38079800  |
| C | -1.45635700 | -0.22563100 | -0.46930800 |
| C | -0.74468000 | -0.94675300 | -1.36418400 |
| H | -1.17670000 | -1.60643600 | -2.11753800 |

16

|   |             |             |             |
|---|-------------|-------------|-------------|
| B | -0.95481900 | 0.52413600  | -0.01321700 |
| B | 1.18441400  | -1.54627200 | -0.09731800 |
| C | -0.72023600 | 2.64255600  | 0.74487100  |
| C | -1.62372600 | 3.83775200  | 0.99011200  |
| H | -2.50163400 | 3.81497300  | 0.34221000  |
| H | -1.07723800 | 4.76859200  | 0.81049900  |
| H | -1.96070200 | 3.83524900  | 2.02977000  |
| C | 0.37502200  | 2.55624700  | 1.80488800  |
| H | -0.09300400 | 2.43693400  | 2.78517800  |
| H | 0.98577200  | 3.46282700  | 1.81974800  |

|   |             |             |             |
|---|-------------|-------------|-------------|
| H | 1.02039300  | 1.69115000  | 1.61920800  |
| C | -0.15831400 | 2.53087600  | -0.70690000 |
| C | -1.13609700 | 3.03818500  | -1.76373000 |
| H | -0.77362500 | 2.74277800  | -2.75116300 |
| H | -1.21952800 | 4.12756800  | -1.73417600 |
| H | -2.13155900 | 2.60781400  | -1.61862700 |
| C | 1.21038400  | 3.15600800  | -0.90854100 |
| H | 1.95131400  | 2.70819400  | -0.24487300 |
| H | 1.16865700  | 4.23157400  | -0.71145900 |
| H | 1.53347300  | 3.00903700  | -1.94260100 |
| C | 3.35098000  | -1.31296600 | -0.70523500 |
| C | 4.54910100  | -2.21806300 | -0.93001400 |
| H | 4.47712500  | -3.13061800 | -0.33581300 |
| H | 5.47293700  | -1.69590000 | -0.66306800 |
| H | 4.60651700  | -2.49572500 | -1.98555600 |
| C | 3.34380200  | -0.15616700 | -1.70162700 |
| H | 3.27577600  | -0.56358400 | -2.71342500 |
| H | 4.25776300  | 0.43910800  | -1.62806000 |
| H | 2.47800200  | 0.49203400  | -1.52897800 |
| C | 3.15712200  | -0.83449100 | 0.76642800  |
| C | 3.56930100  | -1.89008900 | 1.78981700  |
| H | 3.21817800  | -1.58093000 | 2.77724700  |
| H | 4.65596500  | -2.00236200 | 1.82626500  |
| H | 3.12423900  | -2.86104600 | 1.55301500  |
| C | 3.80080400  | 0.50047900  | 1.09580800  |
| H | 3.41799400  | 1.29626200  | 0.45549800  |
| H | 4.88592900  | 0.44026400  | 0.96771700  |
| H | 3.59250600  | 0.76120200  | 2.13698600  |
| O | -1.50325900 | 1.42481200  | 0.86026000  |
| O | -0.05973400 | 1.09424900  | -0.88359100 |

|   |             |             |             |
|---|-------------|-------------|-------------|
| O | 2.13389900  | -2.06734700 | -0.93892900 |
| O | 1.71559300  | -0.70645700 | 0.85285400  |
| C | -5.08703700 | -0.82770100 | -0.45413600 |
| C | -3.73985000 | -0.47790500 | -0.44502400 |
| C | -2.75770200 | -1.38918900 | -0.03353100 |
| C | -3.17320900 | -2.65620500 | 0.40133400  |
| C | -4.51846200 | -3.00686400 | 0.39797900  |
| C | -5.48146300 | -2.09576400 | -0.03483600 |
| H | -5.82816400 | -0.10806700 | -0.78718400 |
| H | -3.44602100 | 0.51852400  | -0.76480900 |
| H | -2.43709400 | -3.36590000 | 0.76663800  |
| H | -4.81872400 | -3.99105700 | 0.74348400  |
| H | -6.53152800 | -2.36979600 | -0.03528000 |
| C | -1.32252900 | -1.00324200 | -0.06032400 |
| C | -0.33013800 | -1.91105700 | -0.16061000 |
| H | -0.59020900 | -2.96487700 | -0.28083500 |

2a

|   |            |             |             |
|---|------------|-------------|-------------|
| B | 0.91699800 | -0.38898900 | 0.04716700  |
| C | 2.83347500 | 0.81821100  | 0.15406400  |
| C | 3.54916900 | 1.82599300  | -0.72921100 |
| H | 3.29107600 | 1.68893000  | -1.78042000 |
| H | 4.63310300 | 1.72617400  | -0.61664300 |
| H | 3.26679300 | 2.83933600  | -0.43258600 |
| C | 3.03215400 | 1.16328900  | 1.62806700  |

|   |             |             |             |
|---|-------------|-------------|-------------|
| H | 2.60157200  | 2.14904000  | 1.82020400  |
| H | 4.09306600  | 1.18880500  | 1.89018500  |
| H | 2.52955200  | 0.43518100  | 2.27169600  |
| C | 3.15629800  | -0.67727000 | -0.16485000 |
| C | 3.41494400  | -0.92329700 | -1.64937600 |
| H | 3.42936200  | -2.00062700 | -1.83115200 |
| H | 4.37601600  | -0.50510300 | -1.95953700 |
| H | 2.62478800  | -0.47974000 | -2.26237300 |
| C | 4.26733600  | -1.28210500 | 0.67653100  |
| H | 4.02086500  | -1.25742400 | 1.73920100  |
| H | 5.20278300  | -0.73675300 | 0.51857500  |
| H | 4.42531600  | -2.32272300 | 0.38173200  |
| O | 1.41073500  | 0.88516000  | -0.10734900 |
| O | 1.90643300  | -1.33401300 | 0.15831000  |
| C | -5.00506900 | -1.21155600 | 0.20307100  |
| C | -3.61907800 | -1.12050000 | 0.21826000  |
| C | -2.98147700 | 0.11007200  | 0.00200700  |
| C | -3.77442300 | 1.24308500  | -0.22086800 |
| C | -5.16322500 | 1.15320800  | -0.23853800 |
| C | -5.78285700 | -0.07574400 | -0.02722200 |
| H | -5.48298700 | -2.17103100 | 0.37306100  |
| H | -3.02900400 | -2.01189700 | 0.40681800  |
| H | -3.29165500 | 2.20285200  | -0.38497100 |
| H | -5.75985300 | 2.04202300  | -0.41707800 |
| H | -6.86538600 | -0.15051700 | -0.03885200 |
| C | -1.51607500 | 0.25674200  | -0.00112400 |
| C | -0.59626500 | -0.71830400 | 0.08373300  |
| H | -0.91440000 | -1.75664900 | 0.16493500  |
| H | -1.16278400 | 1.28494200  | -0.09357500 |
